# Supplementary material for: Risk Factors for Invasive Candida Infection in Critically Ill Patients: A Systematic Review and Meta-analysis
Source: PubMed Central journal article supplement (PMC8941622; doi:10.1016/j.chest.2021.08.081), 2021-10-18
Supplement: mmc1.pdf [file mmc1.pdf]

# Risk Factors for Invasive *Candida* Infection in Critically Ill Patients

## A Systematic Review and Meta-analysis

*Daniel O. Thomas-Rüddel, MD; Peter Schlattmann, MD; Mathias Pletz, MD;  
Oliver Kurzai, MD; and Frank Bloos, MD, PhD*

CHEST 2022; 161(2):345-355

*Online supplements are not copyedited prior to posting and the author(s) take full responsibility for the accuracy of all data.*

© 2022 AMERICAN COLLEGE OF CHEST PHYSICIANS. Reproduction of this article is prohibited without written permission from the American College of Chest Physicians. See online for more details. DOI: 10.1016/j.chest.2021.08.081

**Online Supplement to:**

**“Risk factors for invasive candida infection in critically ill patients: a systematic review and meta-analysis”**

**Full analysis report and supplementary data**

## Table of Contents

|                                                                  |    |
|------------------------------------------------------------------|----|
| MOOSE Checklist for Meta-analyses of Observational Studies ..... | 2  |
| Background of the analysis .....                                 | 4  |
| Study goal .....                                                 | 4  |
| Study protocol .....                                             | 4  |
| Search terms.....                                                | 4  |
| Statistics .....                                                 | 5  |
| Risk of bias assessment .....                                    | 6  |
| Publication bias assesment .....                                 | 7  |
| Results Unadjusted data .....                                    | 11 |
| Assessment of bias .....                                         | 11 |
| Complete analysis .....                                          | 14 |
| Unadjusted Meta-analyses of single risk factors .....            | 15 |
| Sensitivity Analysis .....                                       | 93 |
| Results adjusted data .....                                      | 96 |
| Assessment of bias .....                                         | 96 |
| Complete analysis .....                                          | 97 |
| Adjusted Meta-analyses of single risk factors .....              | 98 |

## MOOSE Checklist for Meta-analyses of Observational Studies

**e-Table 1: MOOSE checklist**

| Item No                                     | Recommendation                                                                                                                                                                                                                                                               | Reported on Page No |
|---------------------------------------------|------------------------------------------------------------------------------------------------------------------------------------------------------------------------------------------------------------------------------------------------------------------------------|---------------------|
| Reporting of background should include      |                                                                                                                                                                                                                                                                              |                     |
| 1                                           | Problem definition                                                                                                                                                                                                                                                           | 1                   |
| 2                                           | Hypothesis statement                                                                                                                                                                                                                                                         | 1                   |
| 3                                           | Description of study outcome(s)                                                                                                                                                                                                                                              | 1                   |
| 4                                           | Type of exposure or intervention used                                                                                                                                                                                                                                        | 2                   |
| 5                                           | Type of study designs used                                                                                                                                                                                                                                                   | 1                   |
| 6                                           | Study population                                                                                                                                                                                                                                                             | 1                   |
| Reporting of search strategy should include |                                                                                                                                                                                                                                                                              |                     |
| 7                                           | Qualifications of searchers (eg, librarians and investigators)                                                                                                                                                                                                               | S4                  |
| 8                                           | Search strategy, including time period included in the synthesis and key words                                                                                                                                                                                               | 1, S4               |
| 9                                           | Effort to include all available studies, including contact with authors                                                                                                                                                                                                      | 1, 2                |
| 10                                          | Databases and registries searched                                                                                                                                                                                                                                            | 1                   |
| 11                                          | Search software used, name and version, including special features used (eg, explosion)                                                                                                                                                                                      | 2                   |
| 12                                          | Use of hand searching (eg, reference lists of obtained articles)                                                                                                                                                                                                             | 1                   |
| 13                                          | List of citations located and those excluded, including justification                                                                                                                                                                                                        | F1                  |
| 14                                          | Method of addressing articles published in languages other than English                                                                                                                                                                                                      | 1                   |
| 15                                          | Method of handling abstracts and unpublished studies                                                                                                                                                                                                                         | 1                   |
| 16                                          | Description of any contact with authors                                                                                                                                                                                                                                      | 1, T1, 6            |
| Reporting of methods should include         |                                                                                                                                                                                                                                                                              |                     |
| 17                                          | Description of relevance or appropriateness of studies assembled for assessing the hypothesis to be tested                                                                                                                                                                   | 1                   |
| 18                                          | Rationale for the selection and coding of data (eg, sound clinical principles or convenience)                                                                                                                                                                                | 2                   |
| 19                                          | Documentation of how data were classified and coded (eg, multiple raters, blinding and interrater reliability)                                                                                                                                                               | 2                   |
| 20                                          | Assessment of confounding (eg, comparability of cases and controls in studies where appropriate)                                                                                                                                                                             | 1                   |
| 21                                          | Assessment of study quality, including blinding of quality assessors, stratification or regression on possible predictors of study results                                                                                                                                   | 2                   |
| 22                                          | Assessment of heterogeneity                                                                                                                                                                                                                                                  | 2                   |
| 23                                          | Description of statistical methods (eg, complete description of fixed or random effects models, justification of whether the chosen models account for predictors of study results, dose-response models, or cumulative meta-analysis) in sufficient detail to be replicated | 2, S5               |
| 24                                          | Provision of appropriate tables and graphics                                                                                                                                                                                                                                 | T1, F1-3, S11-138   |

| Item No                                 | Recommendation                                                                                                            | Reported on Page No |
|-----------------------------------------|---------------------------------------------------------------------------------------------------------------------------|---------------------|
| Reporting of results should include     |                                                                                                                           |                     |
| 25                                      | Graphic summarizing individual study estimates and overall estimate                                                       | F2-3, S11-138       |
| 26                                      | Table giving descriptive information for each study included                                                              | T1                  |
| 27                                      | Results of sensitivity testing (eg, subgroup analysis)                                                                    | 6, S93-95           |
| 28                                      | Indication of statistical uncertainty of findings                                                                         | F2-3, S11-138       |
| Reporting of discussion should include  |                                                                                                                           |                     |
| 29                                      | Quantitative assessment of bias (eg, publication bias)                                                                    | 8                   |
| 30                                      | Justification for exclusion (eg, exclusion of non-English language citations)                                             | 8                   |
| 31                                      | Assessment of quality of included studies                                                                                 | 8                   |
| Reporting of conclusions should include |                                                                                                                           |                     |
| 32                                      | Consideration of alternative explanations for observed results                                                            | N/A                 |
| 33                                      | Generalization of the conclusions (ie, appropriate for the data presented and within the domain of the literature review) | 8                   |
| 34                                      | Guidelines for future research                                                                                            | 8                   |
| 35                                      | Disclosure of funding source                                                                                              | 9                   |

*From: Stroup DF, Berlin JA, Morton SC, et al, for the Meta-analysis Of Observational Studies in Epidemiology (MOOSE) Group. Meta-analysis of Observational Studies in Epidemiology. A Proposal for Reporting. JAMA. 2000;283(15):2008-2012. doi: 10.1001/jama.283.15.2008.*

Page numbers anteceded by an S refer to this Supplement. Numbers anteceded by an F refer to Figures of the main manuscript. Numbers antecede by an T refer to tables from the main manuscript. N/A means not applicable to our study.

## Background of the analysis

### Study goal

The goal of this meta-analysis is to systematically review the literature on potential risk factors for the development of invasive candida infections in critically ill patients and to develop common odds ratios for identification of the most important risk factors.

### Study protocol

This analysis plan is based on the study protocol from Dec.16, 2014.

### Search terms

#### e-Table 2: search terms

| Fungal disease     |                                                                                                                                                                                                                                                                              |
|--------------------|------------------------------------------------------------------------------------------------------------------------------------------------------------------------------------------------------------------------------------------------------------------------------|
| MeSH terms         | mycoses, candida, candidemia                                                                                                                                                                                                                                                 |
| Title/Abstract     | fung, candida*, candidemia, candidaemia, candidiasis                                                                                                                                                                                                                         |
| Patient population |                                                                                                                                                                                                                                                                              |
| MeSH terms         | critical care, intensive care                                                                                                                                                                                                                                                |
| Title/Abstract     | intensive care, critical care, critical illness, critically ill                                                                                                                                                                                                              |
| Risk factors       |                                                                                                                                                                                                                                                                              |
| MeSH terms         | Risk, "models, statistical", regression analysis, logistic models, odds ratio, sensitivity and specificity, survival analysis, operations research", multivariate analysis, decision support techniques, clinical protocols, practice guidelines as topic, patient selection |
| Title/Abstract     | score, risk*, predict*, odds, rule                                                                                                                                                                                                                                           |

*Modified from Muskett H, Shahin J, Eyres G, Harvey S, Rowan K, Harrison D. Risk factors for invasive fungal disease in critically ill adult patients: a systematic review. Critical care (London, England) 2011; 15: R287.*

The search was designed and performed by FB, a experienced clinical researcher. The search was performed on <https://pubmed.ncbi.nlm.nih.gov>, Web of Science, <https://www.sciencedirect.com>, <https://www.biomedcentral.com> and <https://www.cochranelibrary.com/advanced-search> on 23rd of June 2014. Search results were exported to Endnote (Calirvate Analytics, New York City). The search on Pubmed was saved and regular email alerts for new results were received until the 5th of December 2018.

## Statistics

This analysis is based on the data-file **2021-02-16\_Datenextraktion\_final.xlsx** containing the data extraction from Jan.10, 2020 including the correction of the adjusted data from Jan.20, 2021 (Removal of the study by Adrigüzel) and the addition of the study by *Ortiz Ruiz*. Meta-analysis was done with the R-package meta:

### library (meta)

*Schwarzer G. meta: An R package for meta-analysis. R news 2007; 7(3): 40-5.*

Odds ratios and 95% confidence intervals were either taken directly from the publication or calculated by DTR and FB if only frequency tables were given in the publication. Zero counts in a two-by-two table were replaced by 0.5 to avoid infinite odds ratios (Haldane-Anscombe-correction).

Standard error of the odds ratio was calculated from the OR and the upper limit of the 95% confidence interval as follows:

```
calcse<-function(or,u1)
{
  logor<-log(or)
  logul<-log(u1)
  se<-(logul-logor)/qnorm(0.975)
  return(se)
}
```

*function written by Schlattmann*

Metanalysis was performed with the metagen command by using the following syntax:

```
metagen(log(x[, c(OR, se_OR)]),
        sm="OR")
```

where x is the data.frame containing the ORs taken from the studies.

**Problem Study Chow 2008:** This study separately reports ORs for non-*albicans* and *albicans* candidemia against the same control group. For this analysis, ORs and confidence intervals are combined by the average of the log odds ratios:  $or = \exp((\ln(OR1)+\ln(OR2))/2)$ . However, this procedure might underestimate the confidence intervall. (see: <http://www.metafor-project.org/doku.php/analyses:gleser2009>)

## Risk of bias assessment

Two authors (FB and DTR) independently assessed the risk of bias for each included study by adapting the Scottish Intercollegiate Guidelines Network (SIGN) quality checklists for cohort studies and case control studies 10. The checklists provided measures for assessing internal validity (selection of subjects, assessment of exposure, confounding, and statistical analysis) and overall study quality. The modification of the SIGN checklist resulted in 9 checklist-items for the case control studies and the cohort studies (eTable 2 in the electronic supplement). One point was given for each checklist-item fulfilled. No points were given if a checklist-item was not fulfilled, not applicable, or sufficient information for assessment was not available. In addition, risk of bias was assessed in both study types on a scale of 0 to 2 resulting in a maximum attainable score of 10 in both study types. Discrepancies were resolved by discussion between the data extractors and if still unresolved discussion with a third author (MP, OK). Both study-types were deemed high quality (HQ) when the score was at least 9 points, acceptable quality (AQ) when the score was 6-8, and low quality (LQ) when the score was less than or equal to 5 points.

**e-Table 3: Modified SIGN Criteria**

| Cohort studies                                                                                                                                                                      | Case control studies                                                                                                                      |
|-------------------------------------------------------------------------------------------------------------------------------------------------------------------------------------|-------------------------------------------------------------------------------------------------------------------------------------------|
| The two groups being studied are selected from source populations that are comparable in all respects other than the factor under investigation.<br>yes/no/can't say/does not apply | The cases and controls are taken from comparable populations.<br>yes/no                                                                   |
| The likelihood that some eligible subjects might have the outcome at the time of enrolment is assessed and taken into account in the analysis.<br>yes/no/can't say/does not apply   | The same exclusion criteria are used for both cases and controls.<br>yes/no/can't say                                                     |
| The outcomes are clearly defined.<br>yes/no/can't say                                                                                                                               | Cases are clearly defined and differentiated from controls.<br>yes/no/can't say                                                           |
| The assessment of outcome is made blind to exposure status. If the study is retrospective this may not be applicable.<br>yes/no/can't say/does not apply                            | It is clearly established that controls are non-cases.<br>yes/no/can't say                                                                |
| The method of assessment of exposure is reliable.<br>yes/no/can't say                                                                                                               | Measures will have been taken to prevent knowledge of primary exposure influencing case ascertainment.<br>yes/no/can't say/does not apply |
| Evidence from other sources is used to demonstrate that the method of outcome assessment is valid and reliable.<br>yes/no/can't say/does not apply                                  | Exposure status is measured in a standard, valid and reliable way.<br>yes/no/can't say                                                    |
| The main potential confounders are identified and taken into account in the design and analysis.<br>yes/no/can't say                                                                |                                                                                                                                           |
| Have confidence intervals been provided?<br>yes/no                                                                                                                                  |                                                                                                                                           |
| How well was the study done to minimise the risk of bias or confounding?<br>High quality/acceptable/unacceptable                                                                    |                                                                                                                                           |

Modified from <http://www.sign.ac.uk/checklists-and-notes.html> (accessed Feb 20, 2018).



## Publication bias assesment

Risk factors *male sex* and *parenteral nutrition* are selected as marker variables for publication bias since they have been assessed in most studies. See appendix for the other variables. Funnel plot asymmetry was tested with the linear regression test according to Egger (**metabias** of the meta-package).

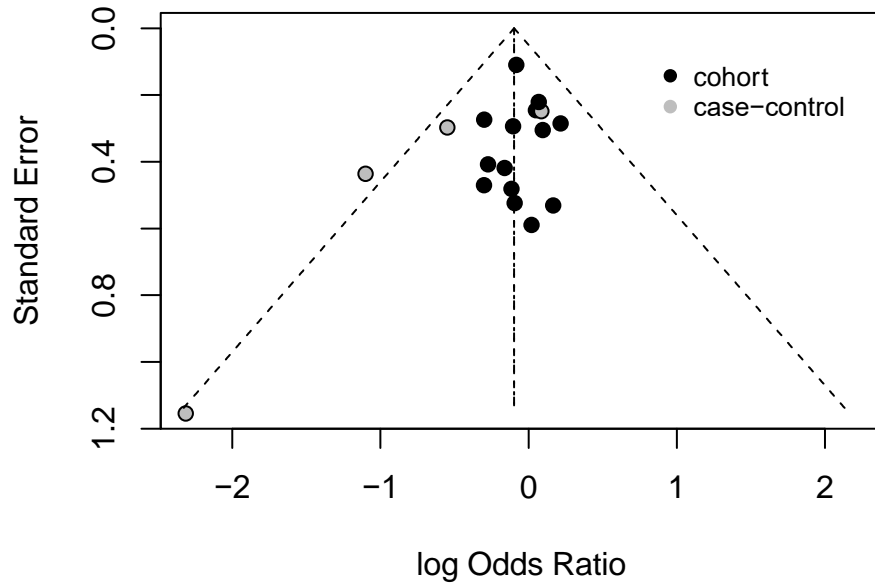

**e-Figure 1: Visually, there is no publication bias (funnel plot asymmetry  $p = 0.145$ ) and no significant heterogeneity for sex ( $I^2 = 0\%$  [0%, 50%]).**

The following analysis is showing a cumulative metaanalysis with the function `metacum(x, pooled = "random", sortvar = .seTE)`. Studies are added step by step ranked by the standard error for the odds ratio of interest. First study added has the lowest standard error.

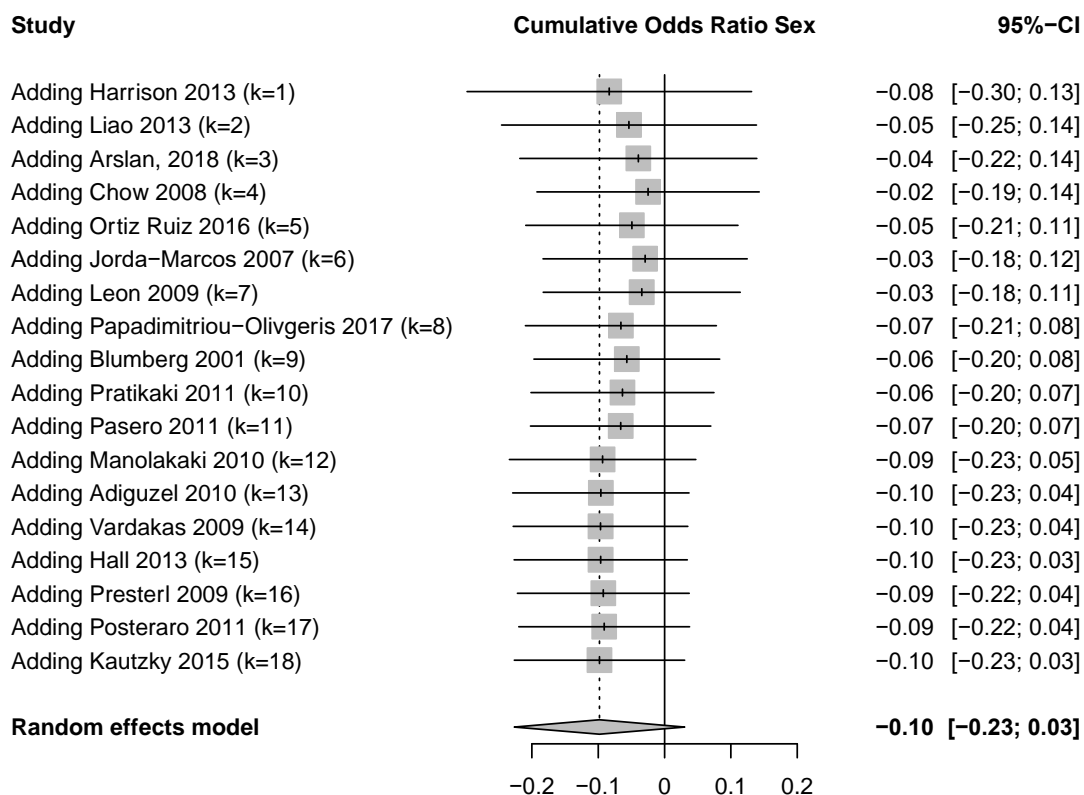

**e-Figure 2: The impact on the common odds ratio for sex remains e-Table after 11 studies added. However, changes in the common odds ratios are not really relevant.**

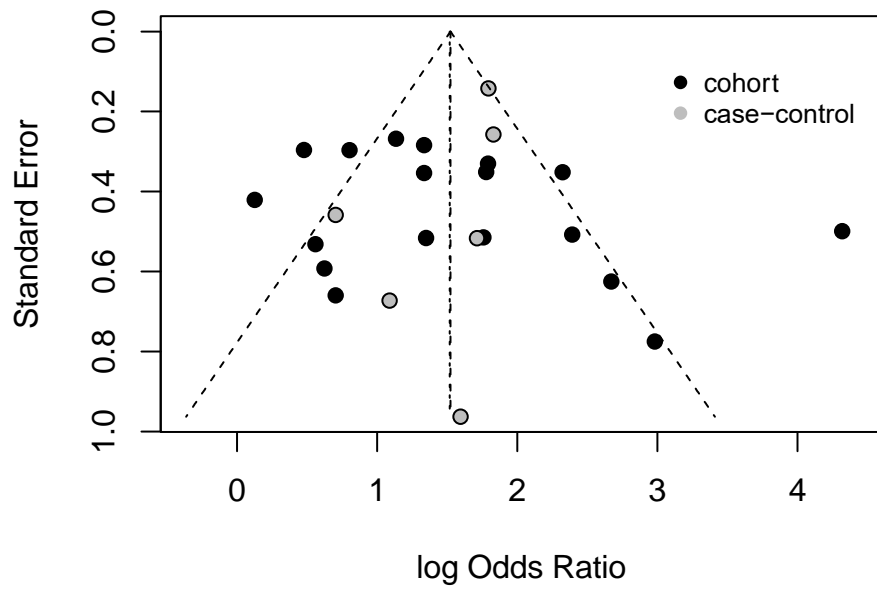

**e-Figure 3: Visually, the funnel plot is asymmetric but this is not significant (funnel plot asymmetry  $p = 0.921$ ) and there is significant heterogeneity for *total parenteral nutrition* ( $I^2 = 76.1\%$  [64.6%, 83.8%]).**

The following analysis is showing a cumulative meta-analysis with the function `metacum(x, pooled = "fixed", sortvar = .seTE)`. Studies are added step by step ranked by the standard error for the odds ratio of interest. First study added has the lowest standard error.

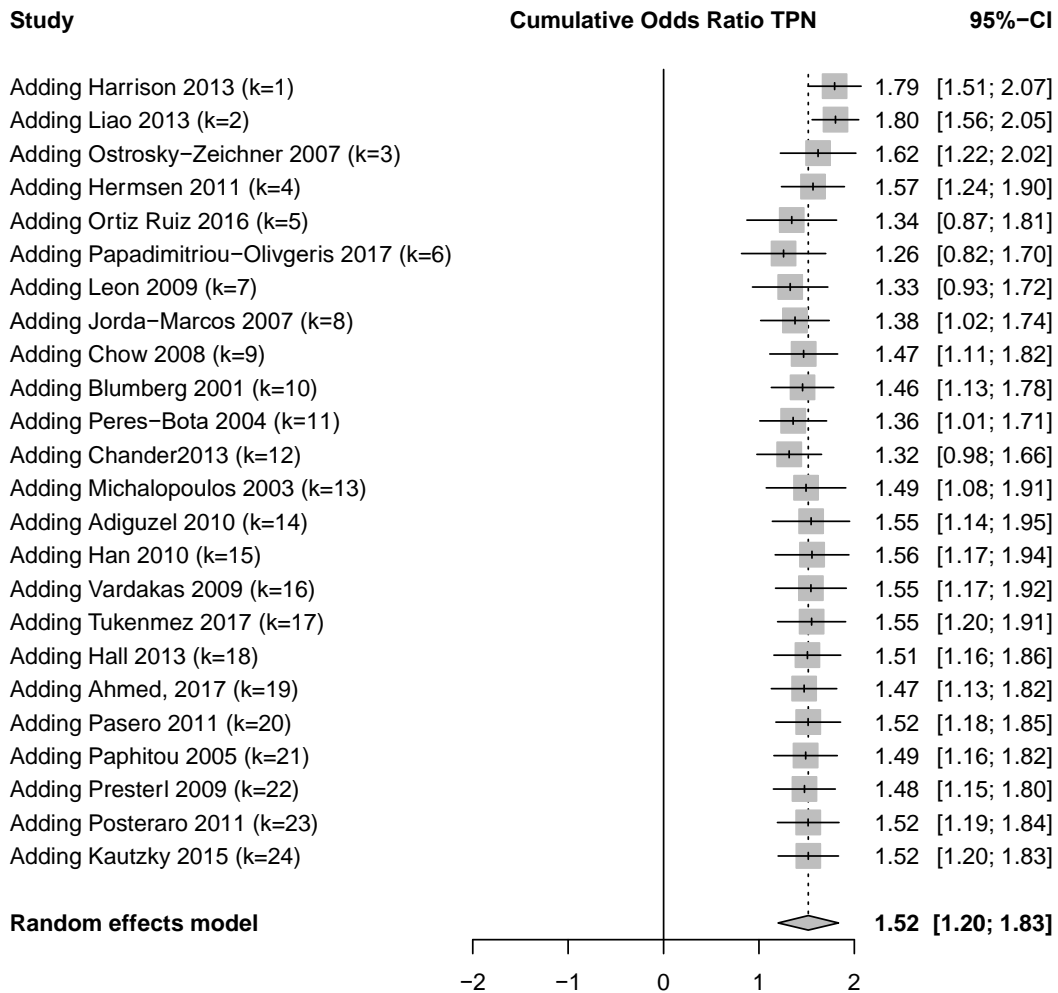

**e-Figure 4: The combined odds ratio for total parenteral nutrition seems to be accurate despite significant heterogeneity. The combined odds ratio remains e-Table after 6 studies were added to the meta-analysis. Less accurate studies do not have an impact on the final result.**

## Results Unadjusted data

### Assessment of bias

This meta-analysis includes 34 studies: 24 cohort and 10 case control studies. Overall quality was moderate with a median of 6 where 11 studies were of low, 18 studies of acceptable and 5 studies of high quality.

**e-Table 4: Bias assessment for each study**

| Study                        | Design       | Quality indicator |
|------------------------------|--------------|-------------------|
| Adiguzel 2010                | cohort       | 4                 |
| Agvald-Ohman 2008            | cohort       | 6                 |
| Ahmed, 2017                  | cohort       | 7                 |
| Arslan, 2018                 | case control | 6                 |
| Blumberg 2001                | cohort       | 9                 |
| Burghi 2011**                | cohort       | 2                 |
| Chander2013                  | cohort       | 6                 |
| Chow 2008                    | case control | 8                 |
| Eneh 2010*                   | cohort       | 0                 |
| Hall 2013                    | cohort       | 5                 |
| Han 2010                     | case control | 7                 |
| Harrison 2013                | cohort       | 8                 |
| Hermesen 2011                | case control | 9                 |
| Jorda-Marcos 2007            | cohort       | 9                 |
| Kautzky 2015                 | cohort       | 5                 |
| Kontopoulou 2014*            | cohort       | 1                 |
| Lau 2015                     | cohort       | 7                 |
| Leleu 2002                   | cohort       | 4                 |
| Leon 2009                    | cohort       | 6                 |
| Liao 2013                    | cohort       | 8                 |
| Manolakaki 2010              | cohort       | 5                 |
| Michalopoulos 2003           | case control | 9                 |
| Ortiz Ruiz 2016              | case control | 9                 |
| Ostrosky-Zeichner 2007       | cohort       | 7                 |
| Ostrosky-Zeichner 2011       | cohort       | 5                 |
| Papadimitriou-Olivgeris 2017 | case control | 8                 |
| Paphitou 2005                | cohort       | 6                 |
| Pasero 2011                  | cohort       | 8                 |
| Peres-Bota 2004              | cohort       | 6                 |
| Posteraro 2011               | cohort       | 6                 |
| Pratikaki 2011               | case control | 6                 |
| Presterl 2009                | cohort       | 6                 |
| Tukenmez 2017                | case control | 4                 |
| Vardakas 2009                | case control | 5                 |

\*: study with abstract only.

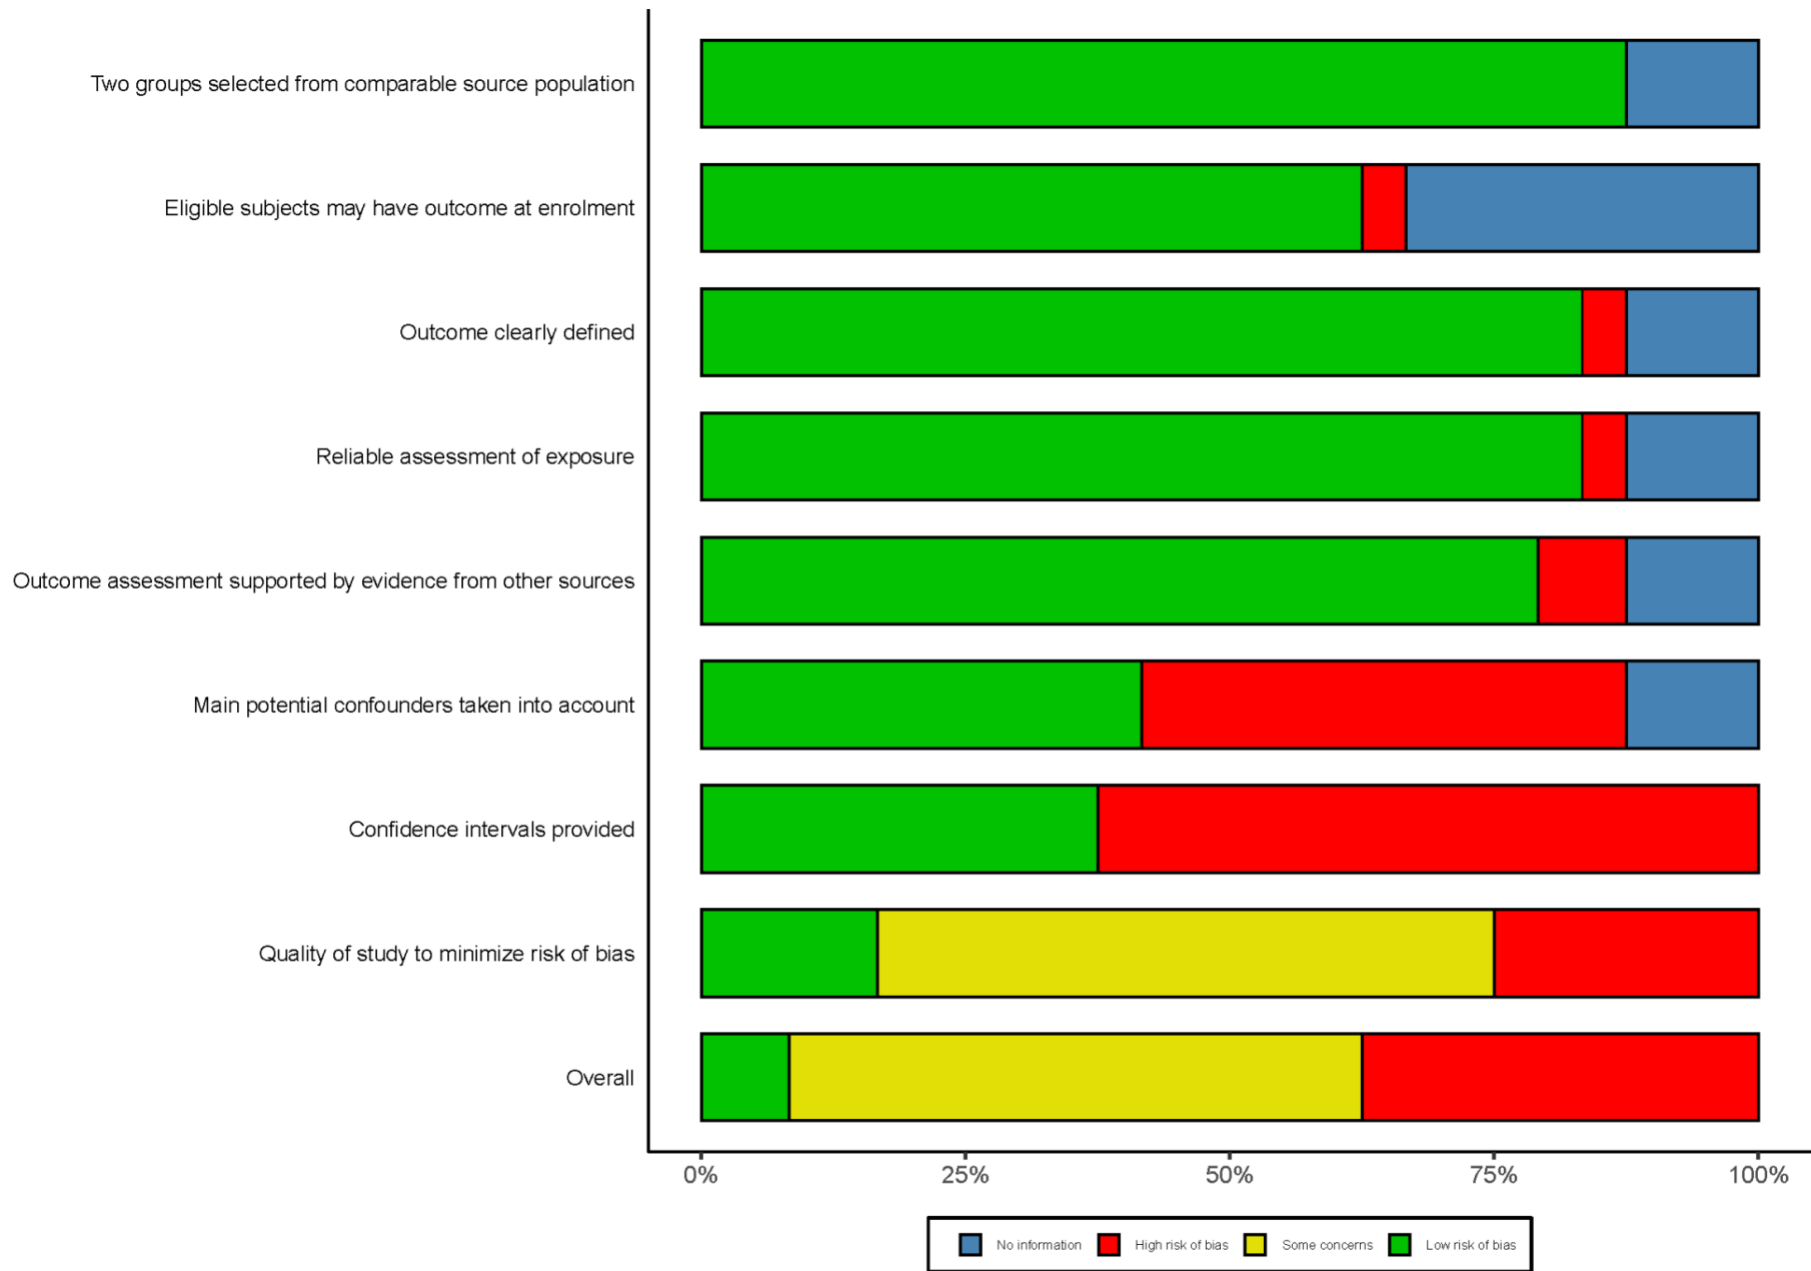

**e-Figure 5: Bias Cohort Studies - Items**

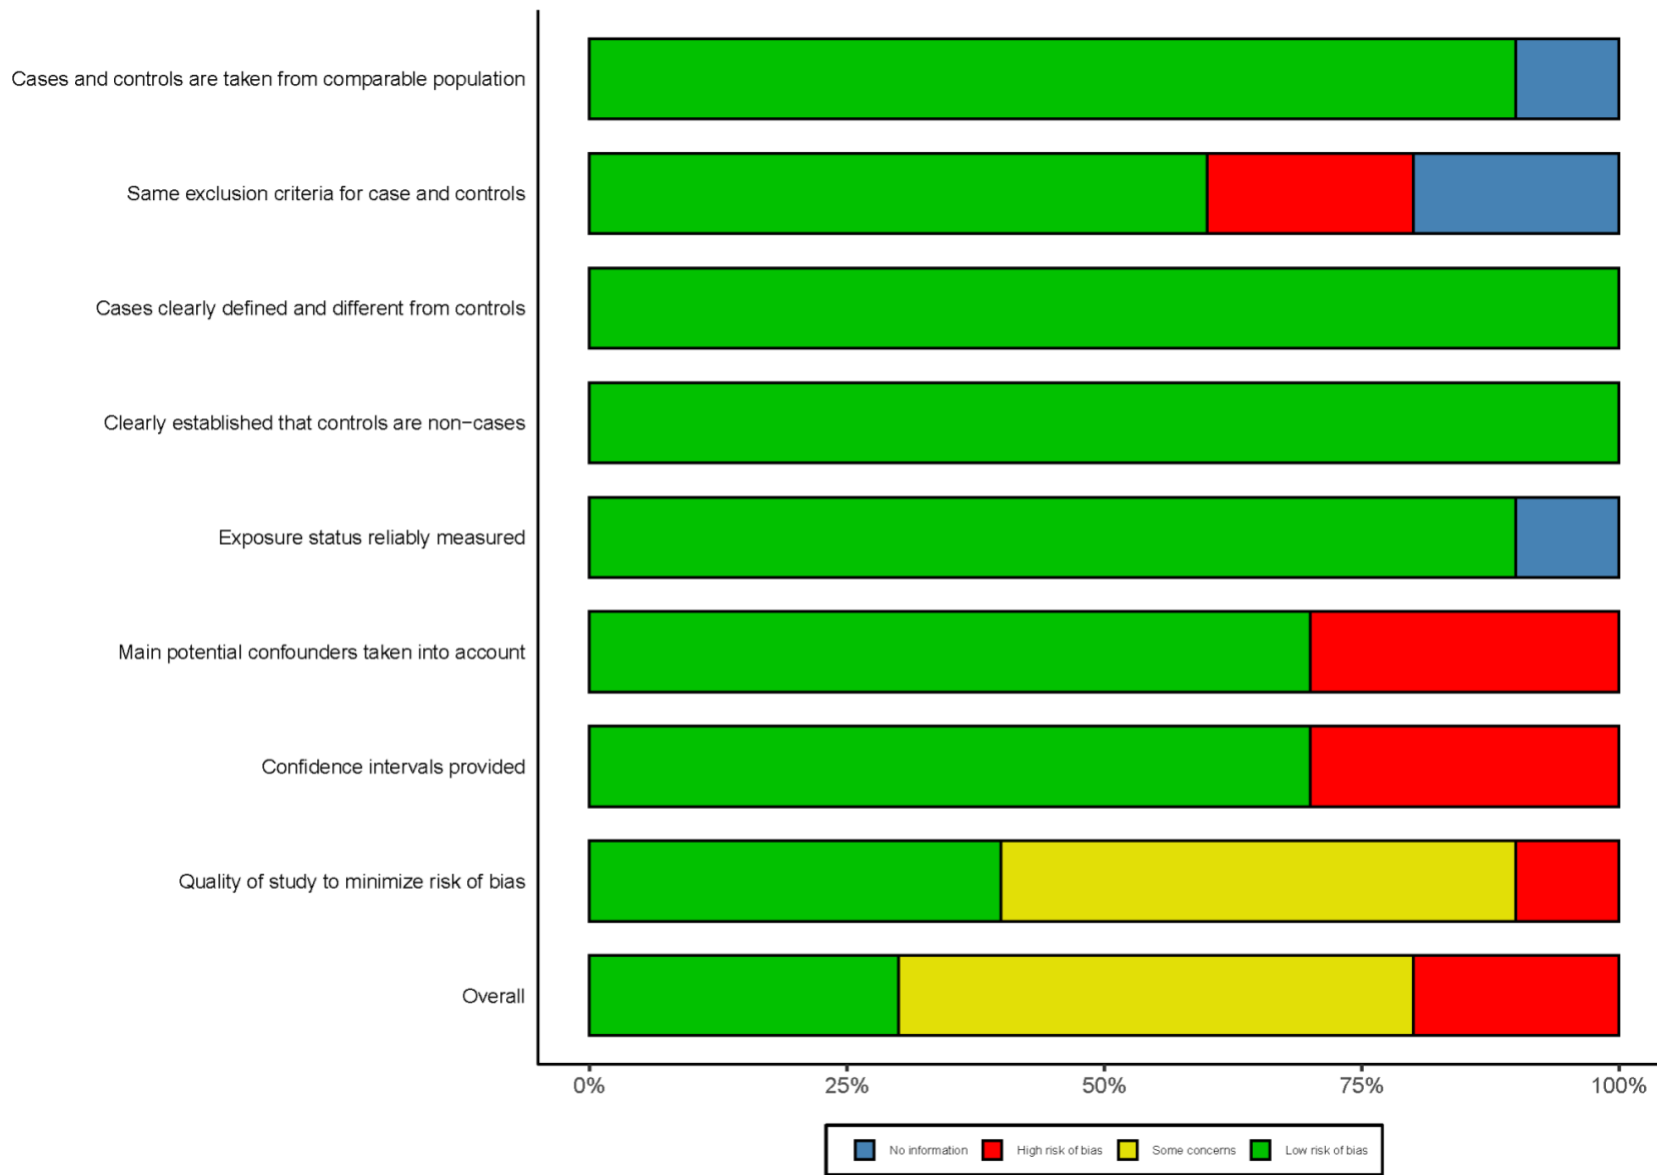

**e-Figure 6: Bias Case Control Studies - Items**

## Complete analysis

The following figure shows the common odds ratios (**random effects model**) of all obtained risk factors for invasive candida infection. Risk factors represented in one study only are excluded. Forest plot for all single risk factors are shown in the appendix.

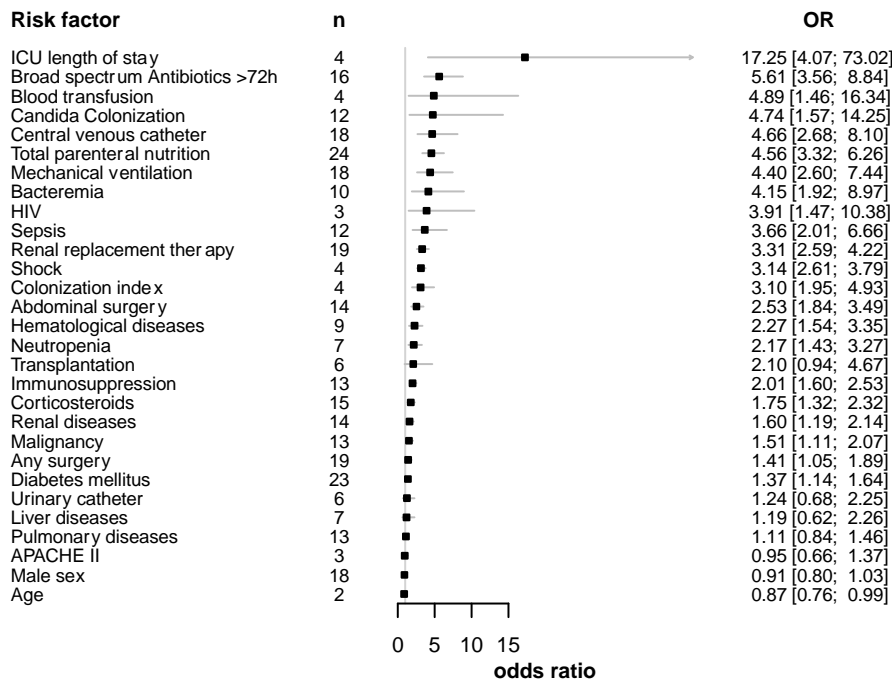

**e-Figure 7: n: number of studies assessing this risk factor; or: odds ratio with 95% confidence intervals**

Odds ratio for ICU length of stay is a significant outlier. The following figure presents the odds ratios with this parameter excluded.

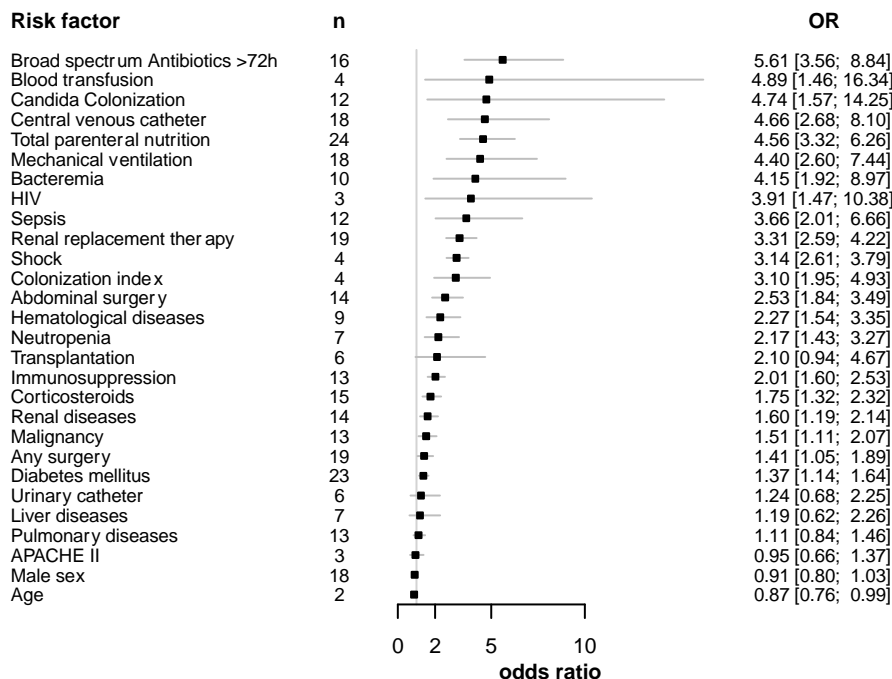

**e-Figure 8: n: number of studies assessing this risk factor; or: odds ratio with 95% confidence intervals**



## Unadjusted Meta-analyses of single risk factors

Cumulative meta-analysis is only done if two studies observed the risk factor.

Funnel plot is presented if at least seven studies reported the risk factor and Egger test for Funnel plot asymmetry was performed if at least ten studies reported the risk factor.

Cutoffs used to dichotomize continuous variables or units of measurement used by individual studies are reported in the footnotes for each risk factor meta-analysis. Definitions of risk factors significantly deviating from the terms or definitions used by the majority of studies are also reported in the footnotes.

Where continuous variables were only reported as summary statistics they are reported in the footnote either as mean $\pm$ SD or median [IQR Q1-Q3] or median (range Min-Max) with values for ICI first versus (vs.) controls followed by the reported p value or not significant (NS) in parentheses as reported in the individual studies.

When a case control study did match for a certain risk factor, or when a risk factor was inclusion or exclusion criterion of a study no data was extracted but it is reported in the footnote.

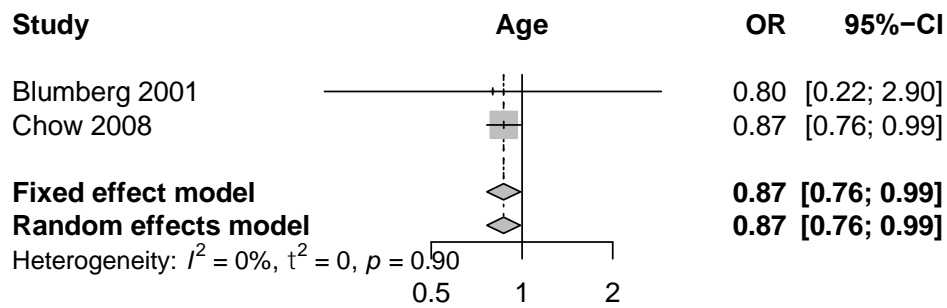

Age  $\geq$  65 years in Blumberg 2001  
 Per decade in Chow 2008

65 [55-73] years vs. 64 [53-79] (p=0.5) in Arslan 2018  
 28.2 $\pm$ 9.7 years vs. 52.7 $\pm$ 15.7 (p=0.003) in Kautzky 2015  
 42.7 $\pm$ 20.3 years vs. 45.4 $\pm$ 19.7 (p=0.5) in Manonalaki 2010  
 62.0 $\pm$ 17.6 years vs. 61.2 $\pm$ 16.9 (p=0.8) in Papadimitiou-Olivgeris 2017  
 64 (24-81) years vs. 58 (18-81) (NS) in Peres-Bota 2004

Age was matched for in Turkmenez 2017, Ortiz Ruiz 2016 & Vardakas 2009

**e-Figure 9**

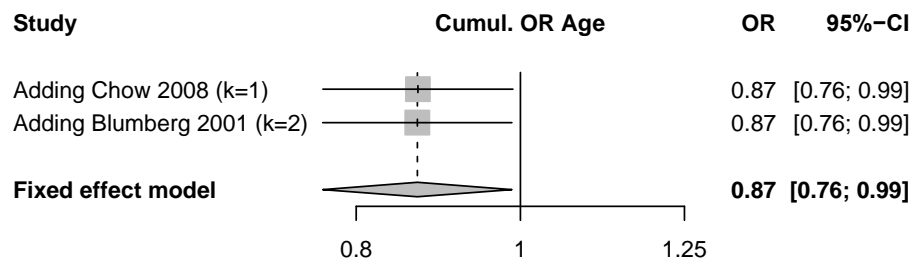

**e-Figure 10**

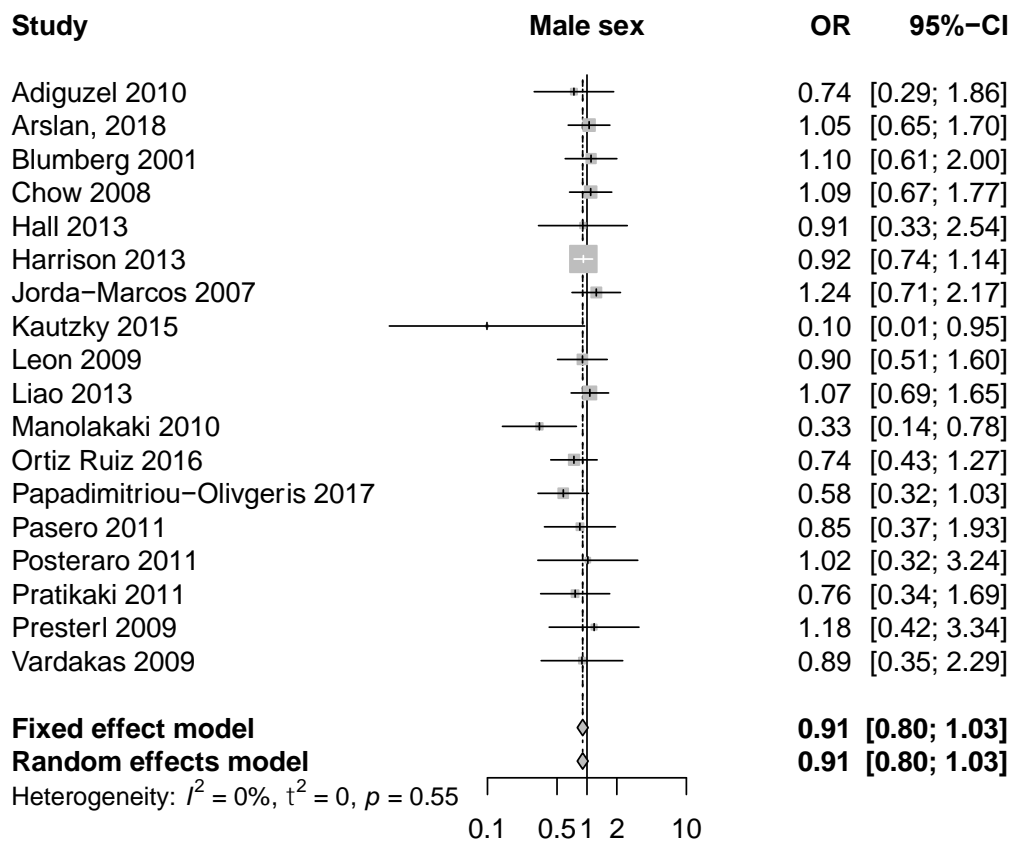

e-Figure 11

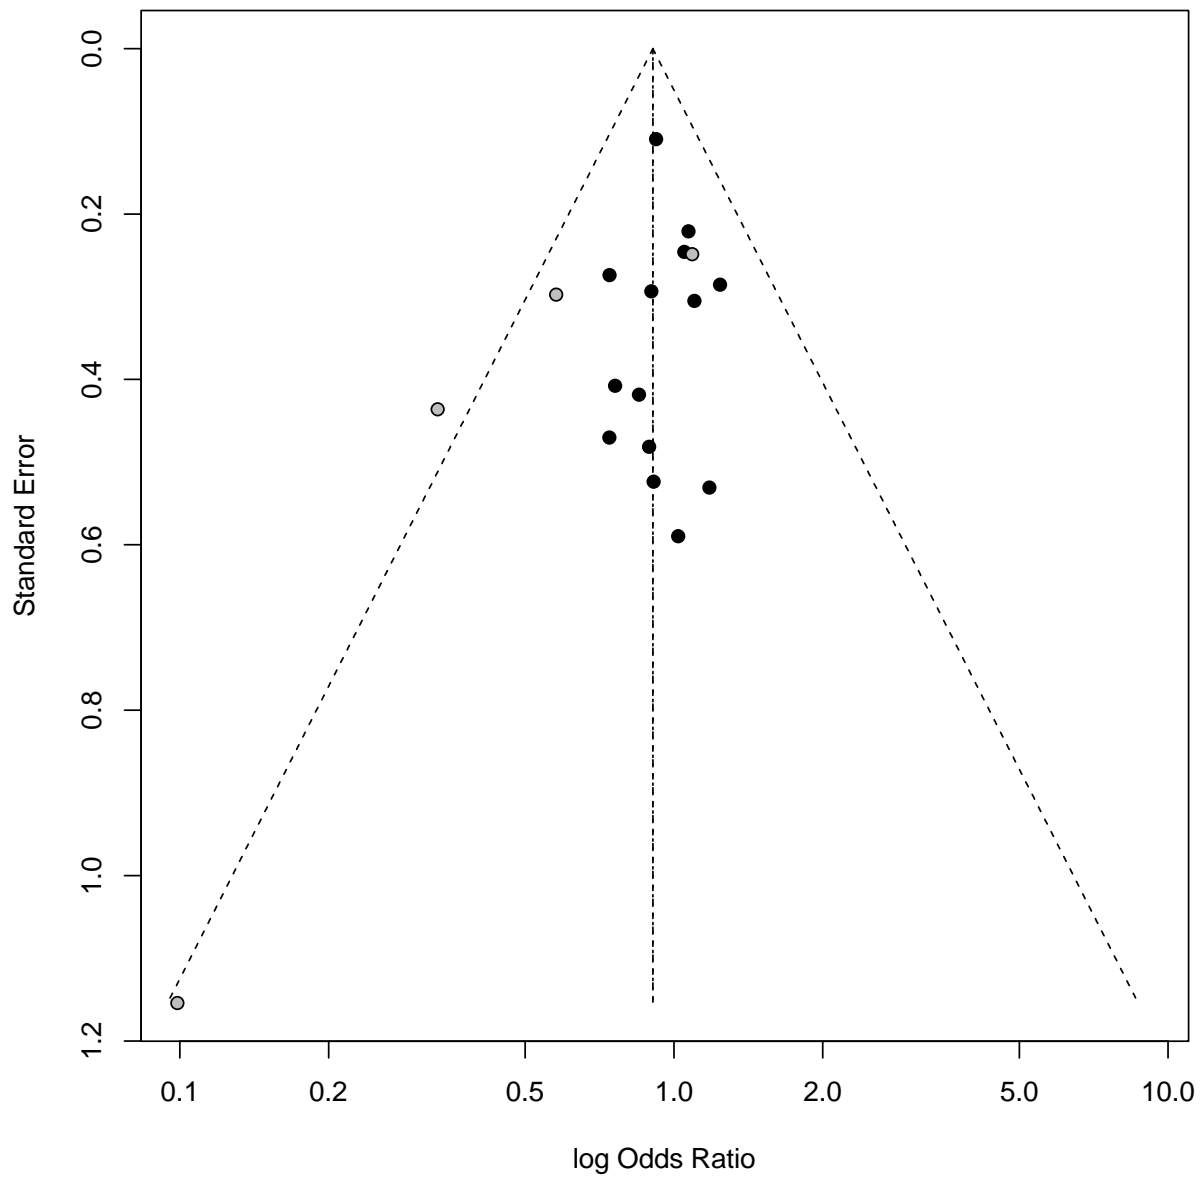

e-Figure 12

## [1] "p-value for Funnel-plot asymmetry (Eggers-test): 0.145"

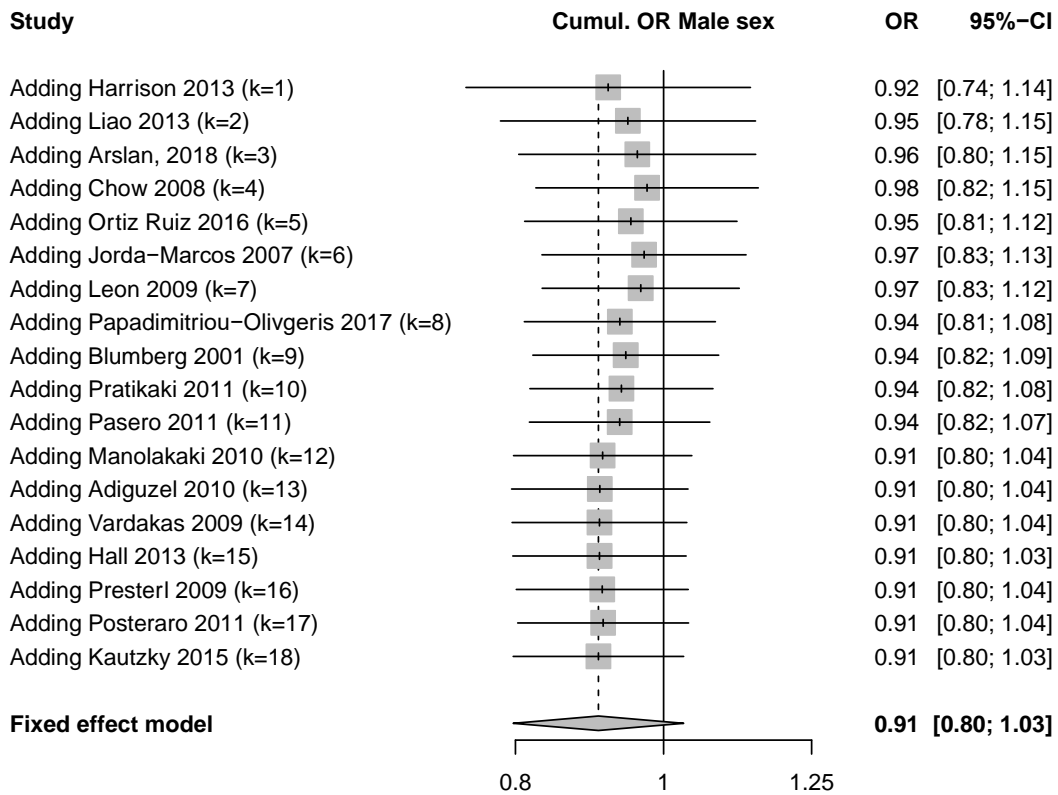

**e-Figure 13**

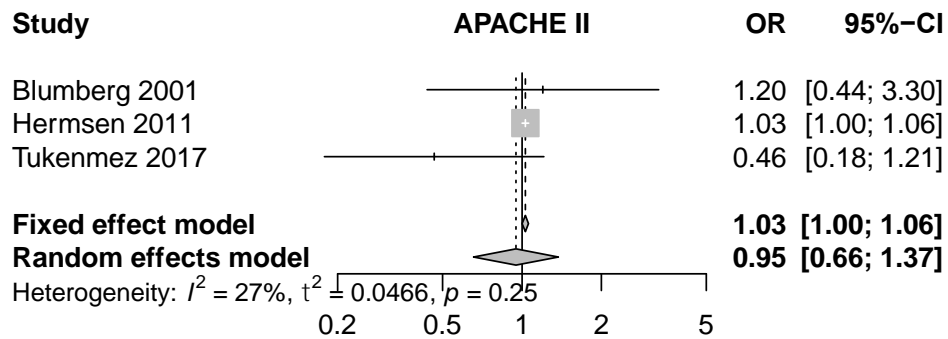

≥ 25 points in Blumberg 2001  
 Per point increase in Hermesen 2011  
 > 20 points in Turkenez 2017

16 [11-22] points vs. 16 [12-21] (p=0.7) in Arslan 2018  
 18 [13-22] points vs. 17 [12-22] (p=0.6) in Ortiz Ruiz 2016  
 17.4±7.0 points vs. 17.8±7.0 (p=0.7) in Papadimitriou-Olivgeris 2017  
 18.4±6.0 points vs. 17.0±7.0 (NS) in Peres-Bota 2004  
 20.3±7.9 points vs. 20.4±7.2 (p=0.9) in Vardakas 2009

**e-Figure 14**

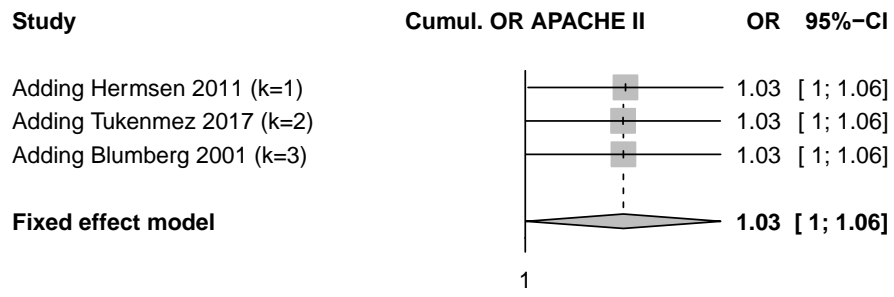

e-Figure 15



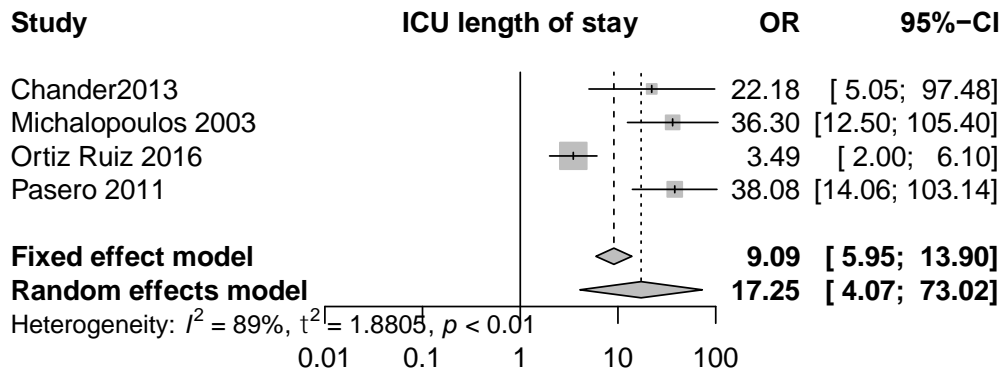

- > 15 days in Chander 2013
- ≥ 9 days in Michalopoulos 2003
- > 14 days in Ortiz Ruiz 2016
- > 20 days in Pasero 2011

22 [15-33]days vs. 3.0 [3-6] (p<0.01) in Chow 2008 for *Candida albicans*  
 25 [14-40]days vs. 3.0 [3-6] (p<0.01) in Chow 2008 for *Candida non albicans*  
 17 [9-23] days vs. 7.3 [3-15] (p<0.01) in Hall 2013  
 27 ± 7.5 days vs. 2.0 ± 1.6 (p<0.01) in Michalopoulos 2003, see above for dichotomized data  
 22 ± 1.7 days vs. 14 ± 1.4 (p<0.01) in Ortiz Ruiz 2016, see above for dichotomized data  
 22 [18;30]days vs. 5.5 [2;16] (p<0.01) in Tukenmez 2017

matched for in Vardakas 2009 & Pratikaki 2011

**e-Figure 16**

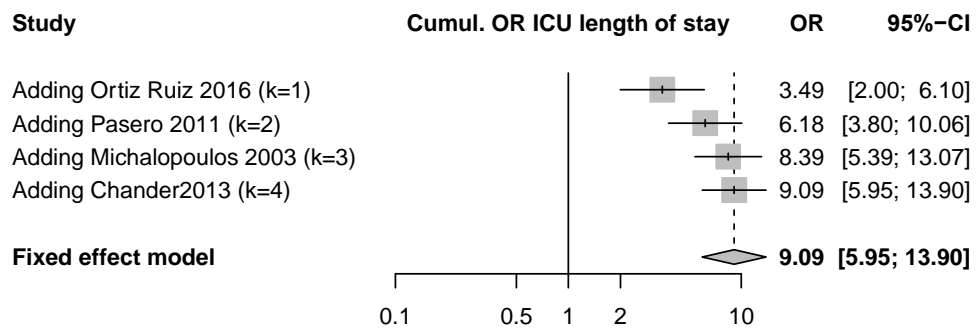

**e-Figure 17**

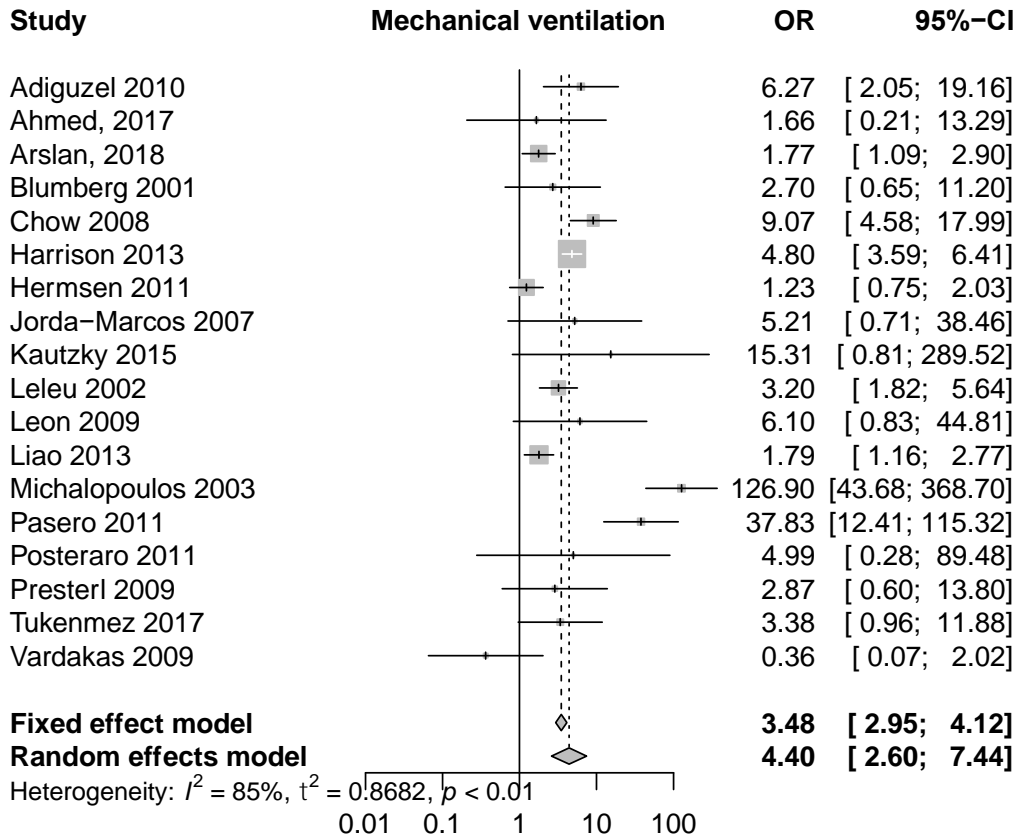

≥ 2 days in Liao 2013  
 ≥ 10 days in Michalopoulos 2003  
 > 10 days in Pasero 2011

All patients were ventilated in Papadimitriou-Olivgeris 2017

10.9±4.1 days vs. 4.0±4.7 (0.03) in Peres-Bota 2004

**e-Figure 18**

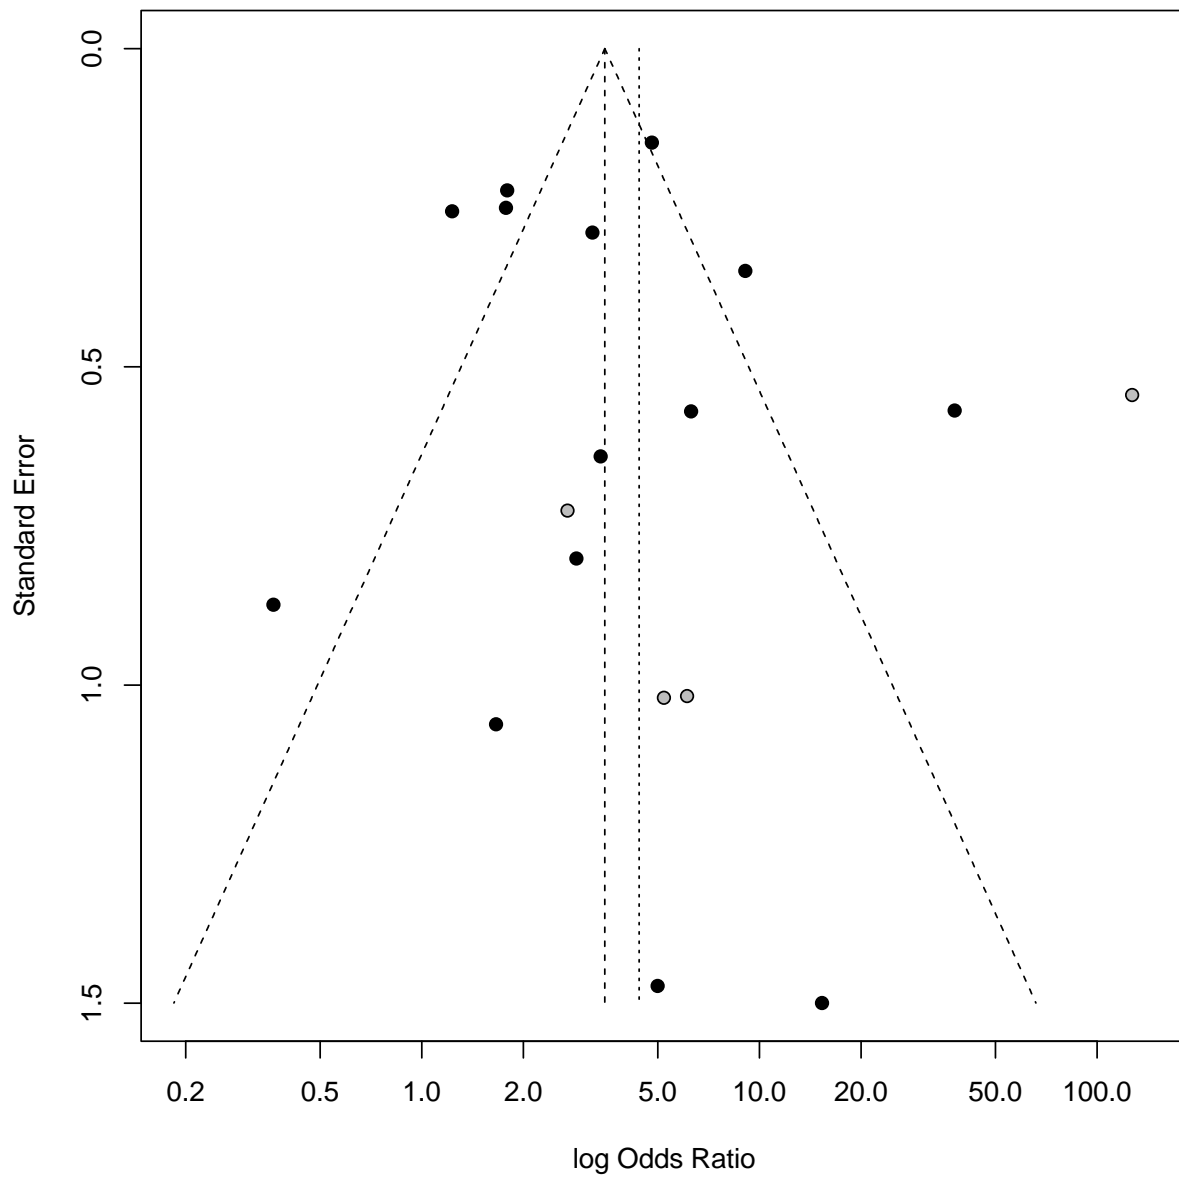

e-Figure 19  
## [1] "p-value for Funnel-plot asymmetry (Eggers-test): 0.463"

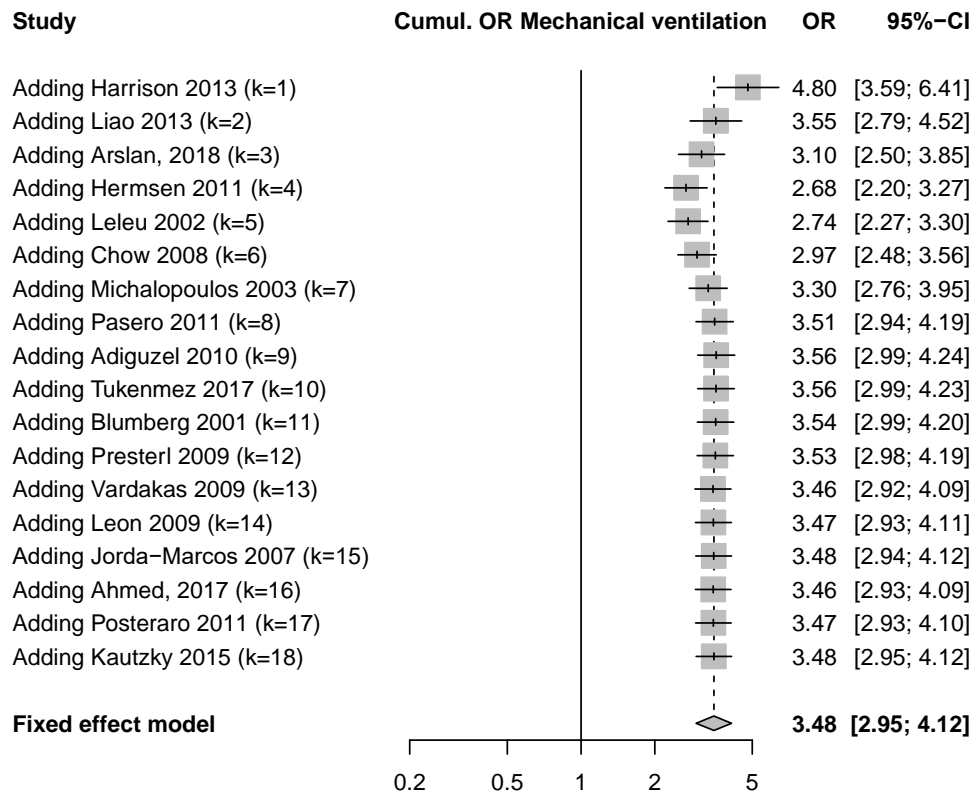

e-Figure 20

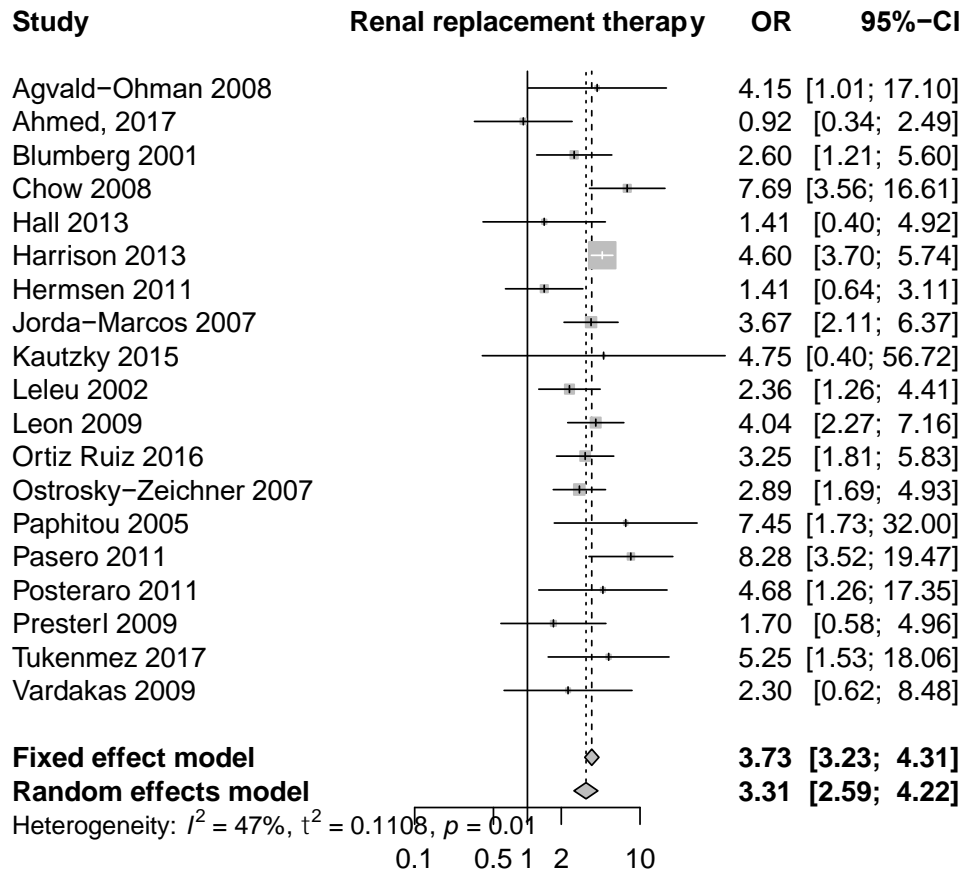

Any RRT up to day 3 in Papithou 2005  
 Any RRT up day 1-3 in Ostrosky-Zeichner 2007

1.7±2.2 days vs. 0.6±2.3 (p=0.03) in Peres-Bota 2004

**e-Figure 21**

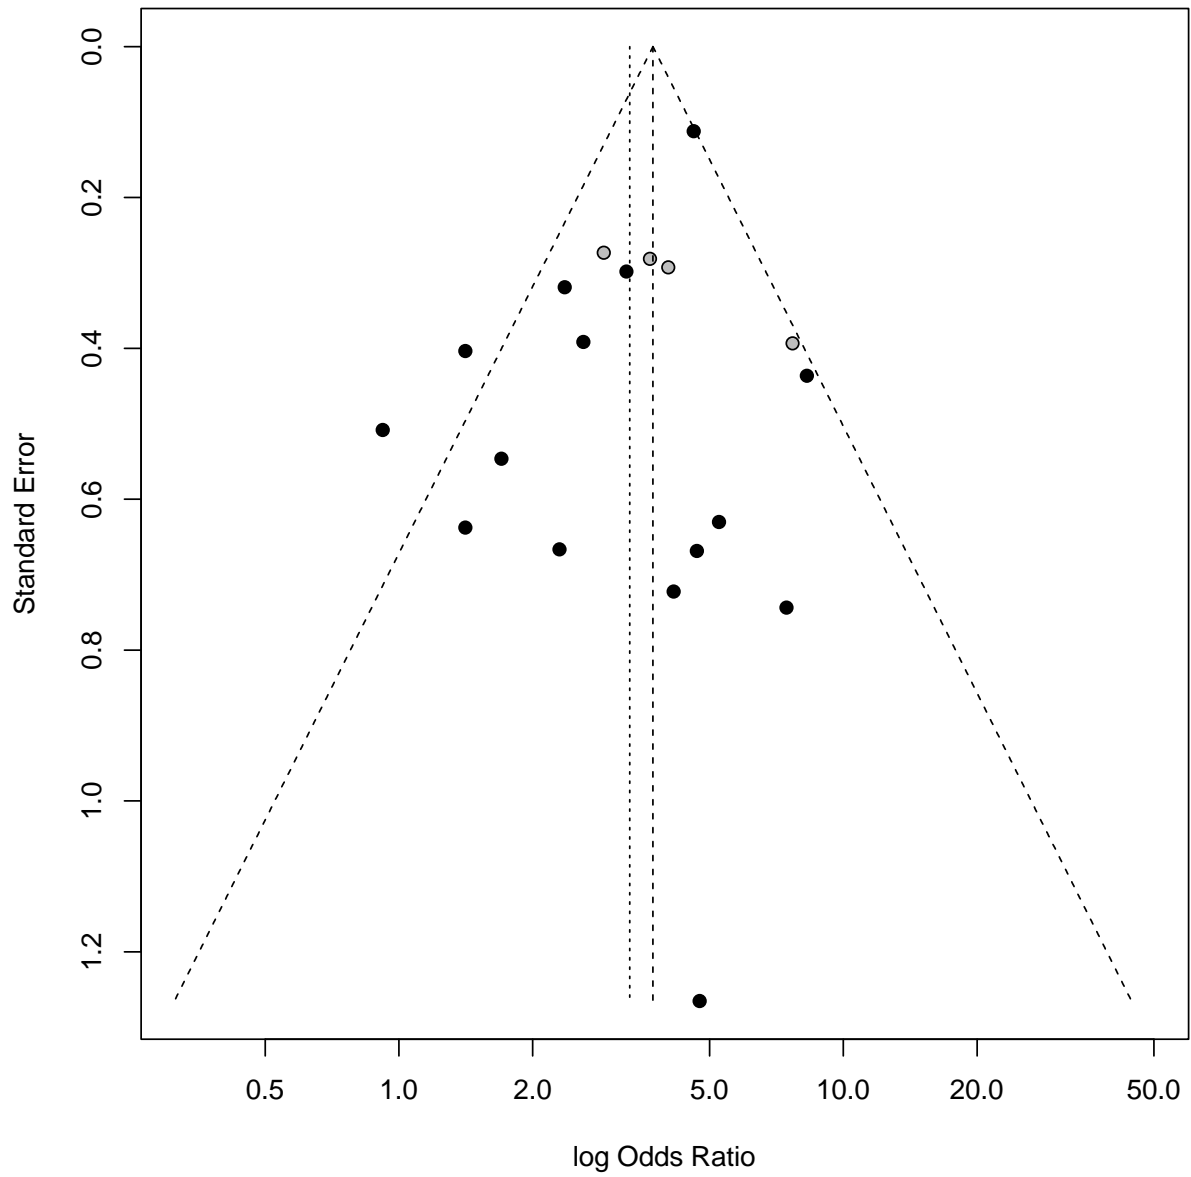

e-Figure 22

## [1] "p-value for Funnel-plot asymmetry (Eggers-test): 0.159"

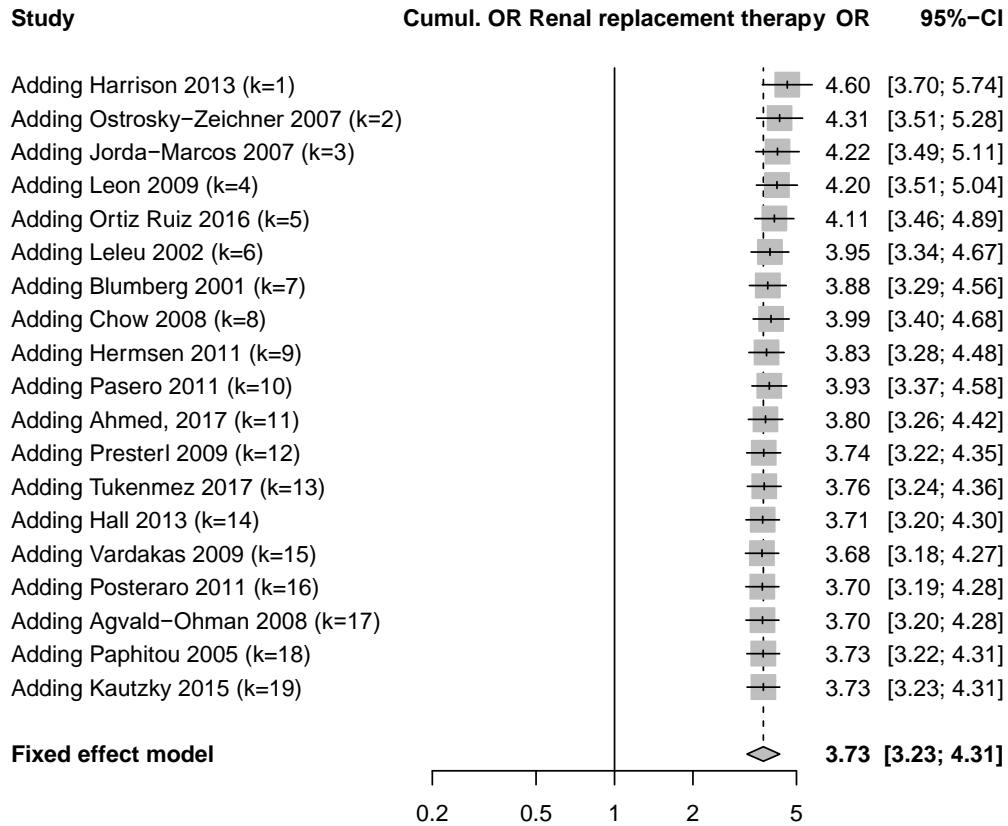

e-Figure 23



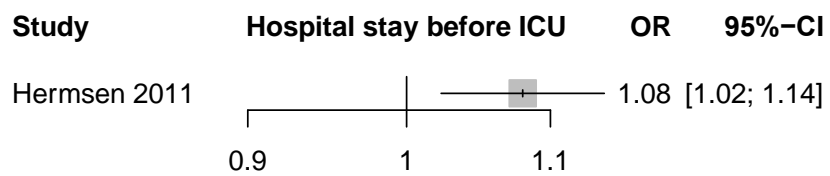

14 days [7-25.5] vs. 7 [3-12] ( $p < 0.01$ ) in Ahmed 2017  
 4.6 $\pm$ 5.6 days vs. 3.0 $\pm$ 3.3 (NS) in Peres-Bota 2004

Total days of stay including ICU:  
 35.4 $\pm$ 3.0 days vs. 21.4 $\pm$ 1.8 ( $p = 0.001$ ) in Ortiz-Ruiz 2016

**e-Figure 24**

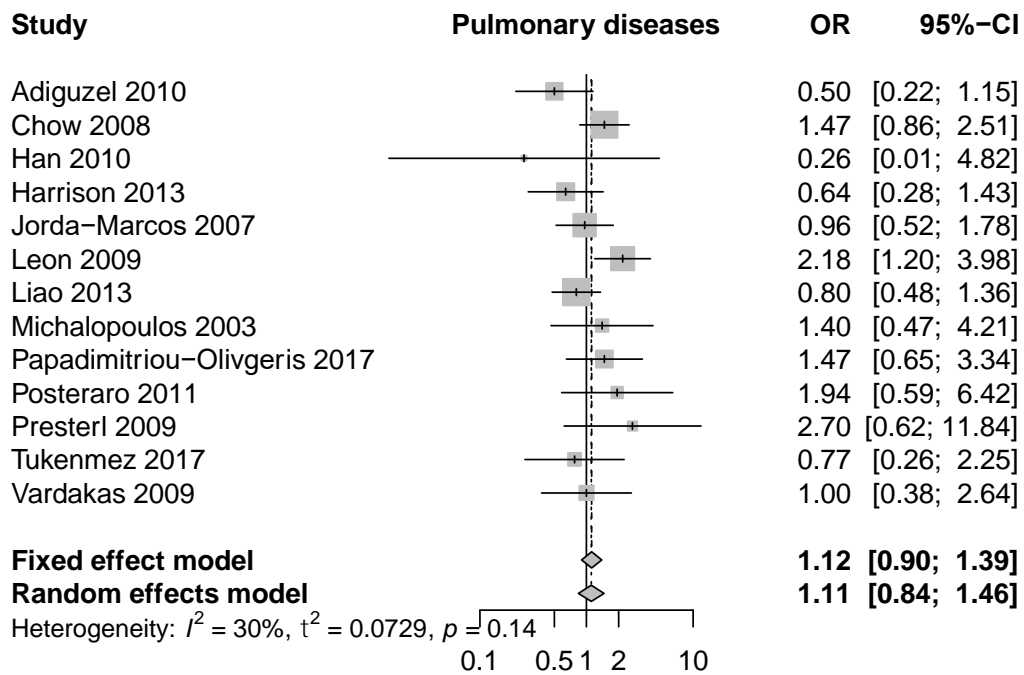

Only COPD in Adiguzel 2010, Han 2010, Leon 2009, Liao 2010 & Michalopoulos 2003

e-Figure 25

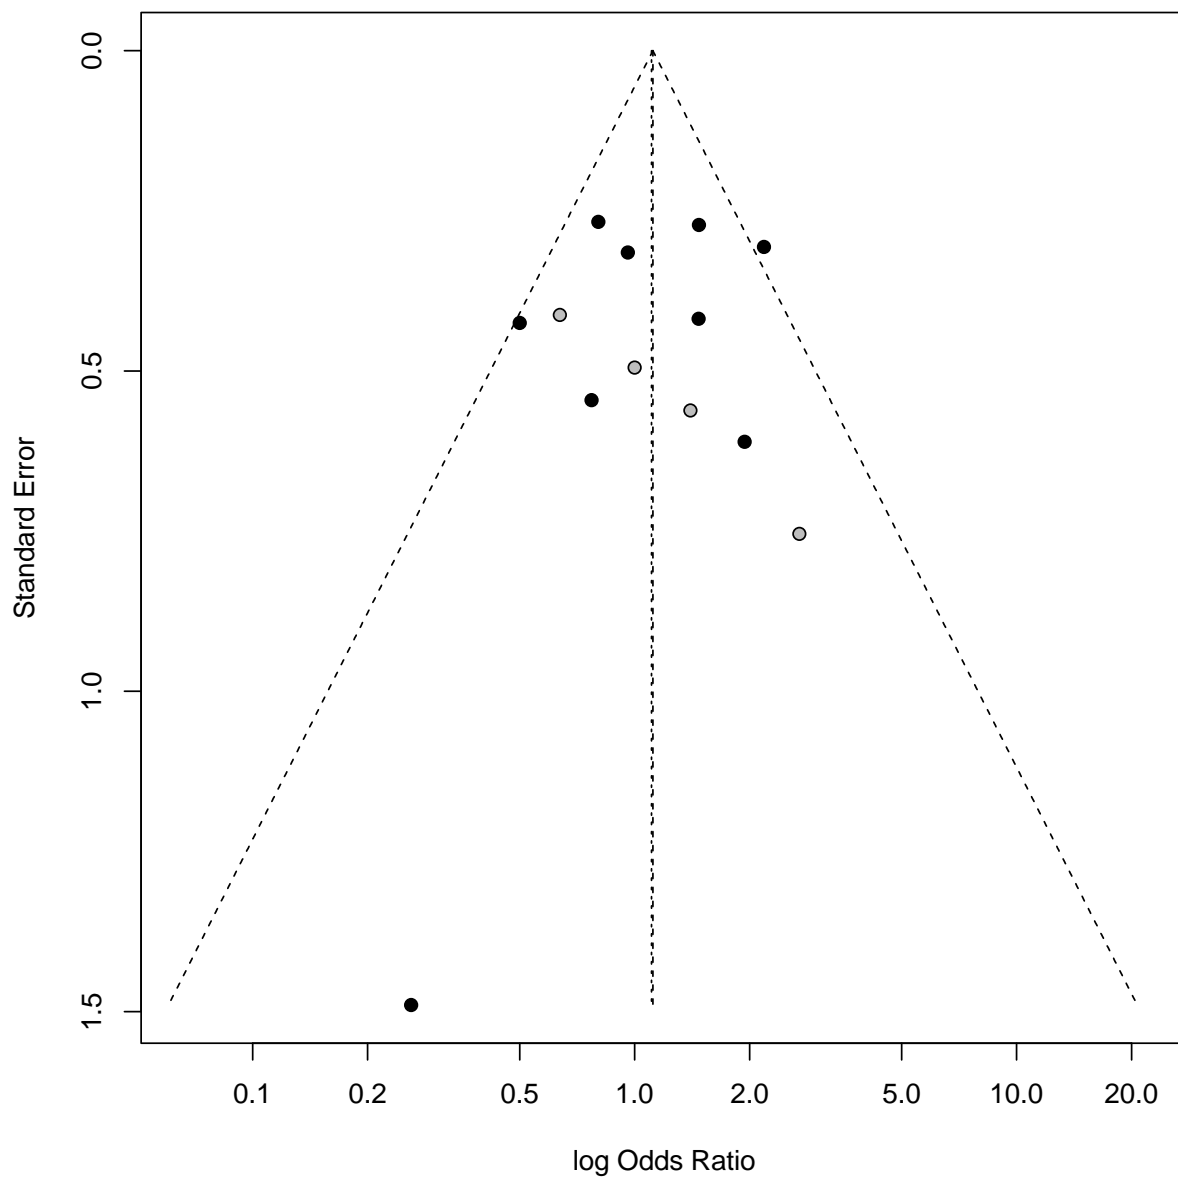

e-Figure 26

## [1] "p-value for Funnel-plot asymmetry (Eggers-test): 0.765"

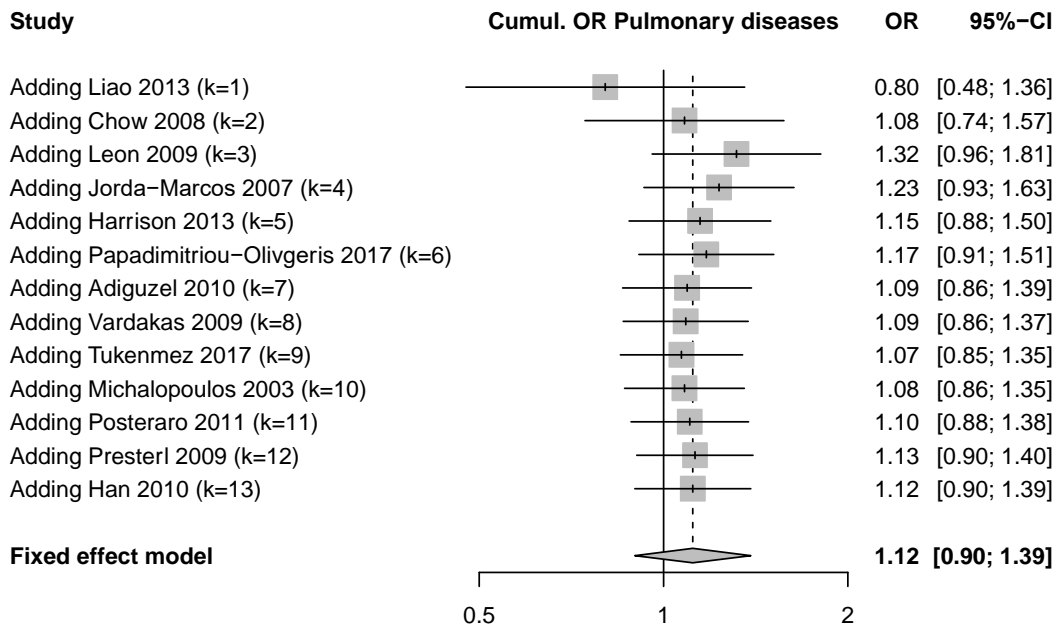

e-Figure 27

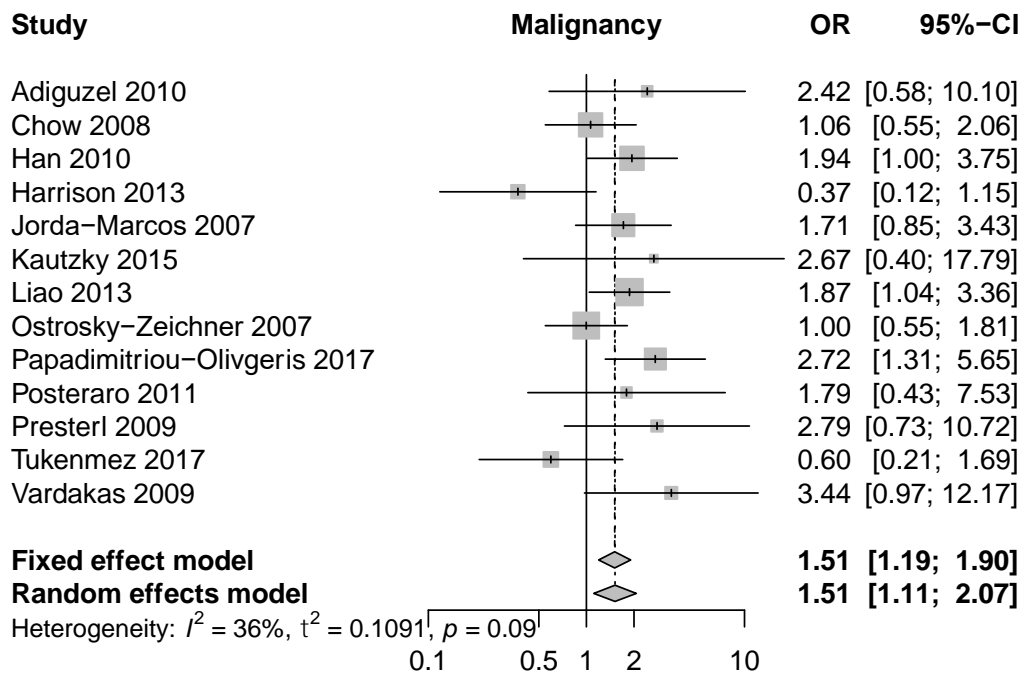

e-Figure 28

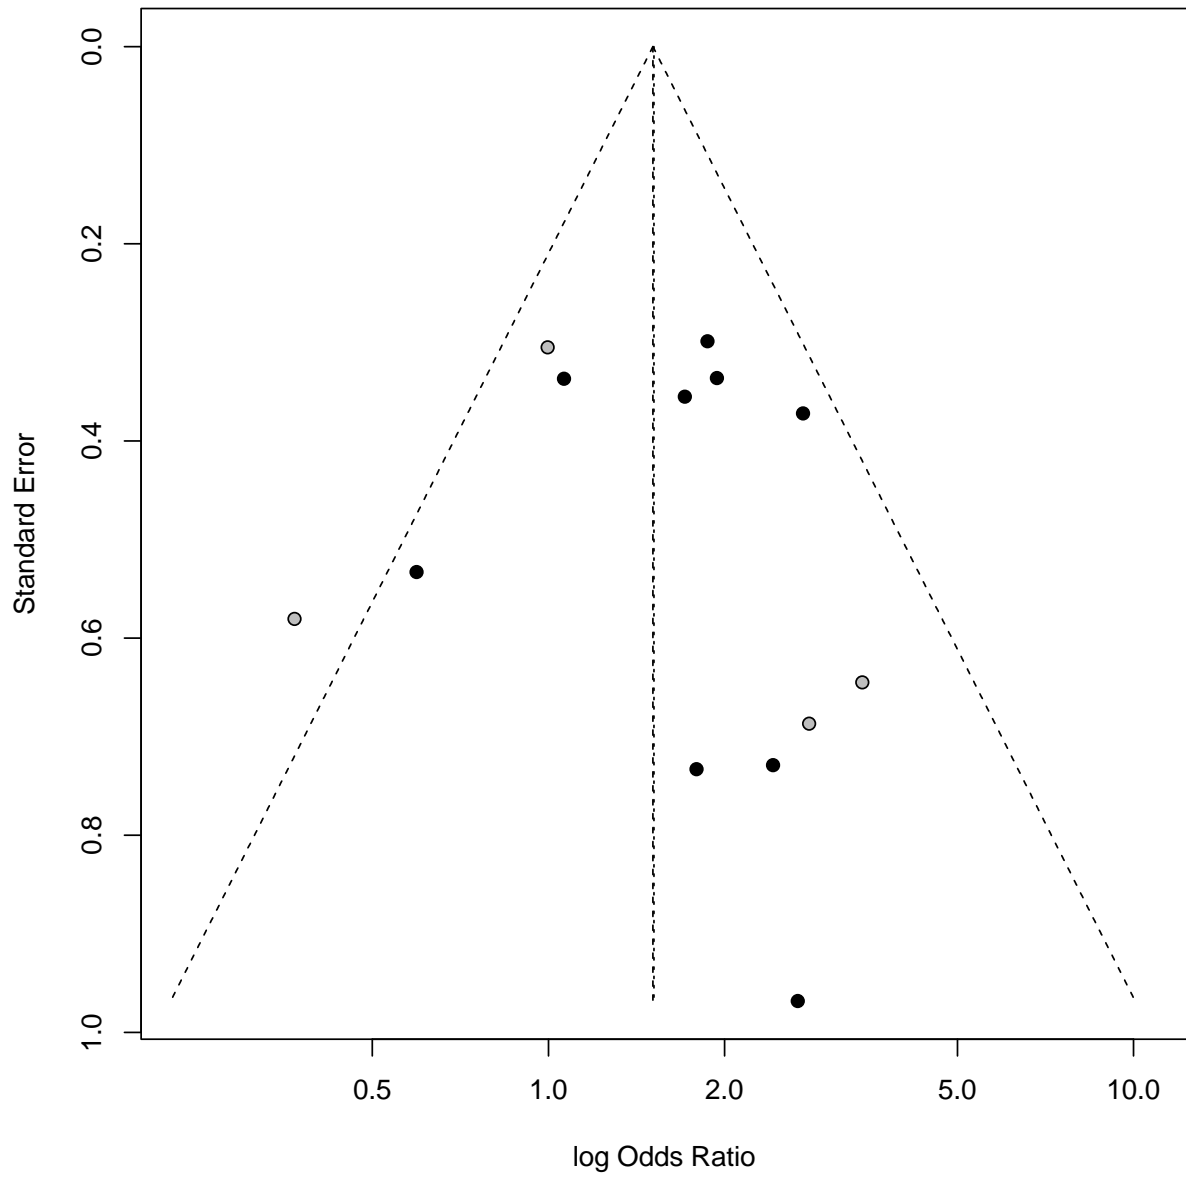

e-Figure 29

## [1] "p-value for Funnel-plot asymmetry (Eggers-test): 0.771"

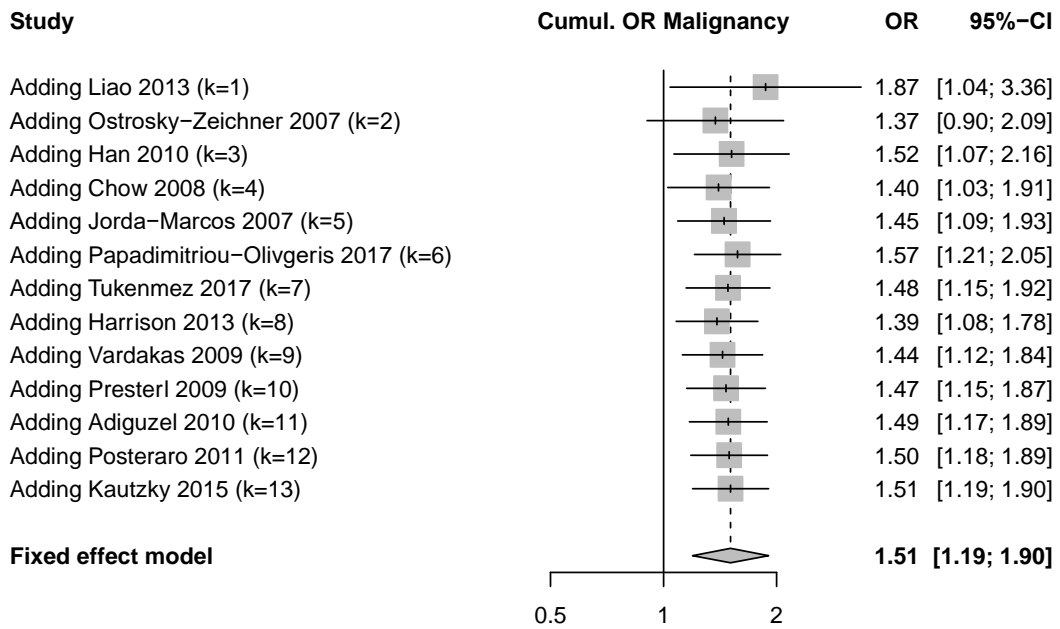

e-Figure 30

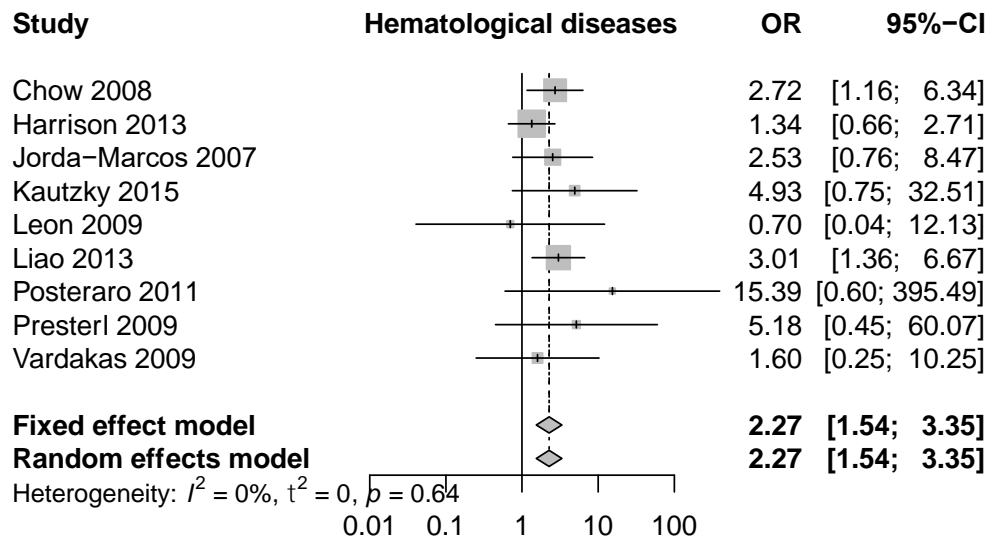

e-Figure 31



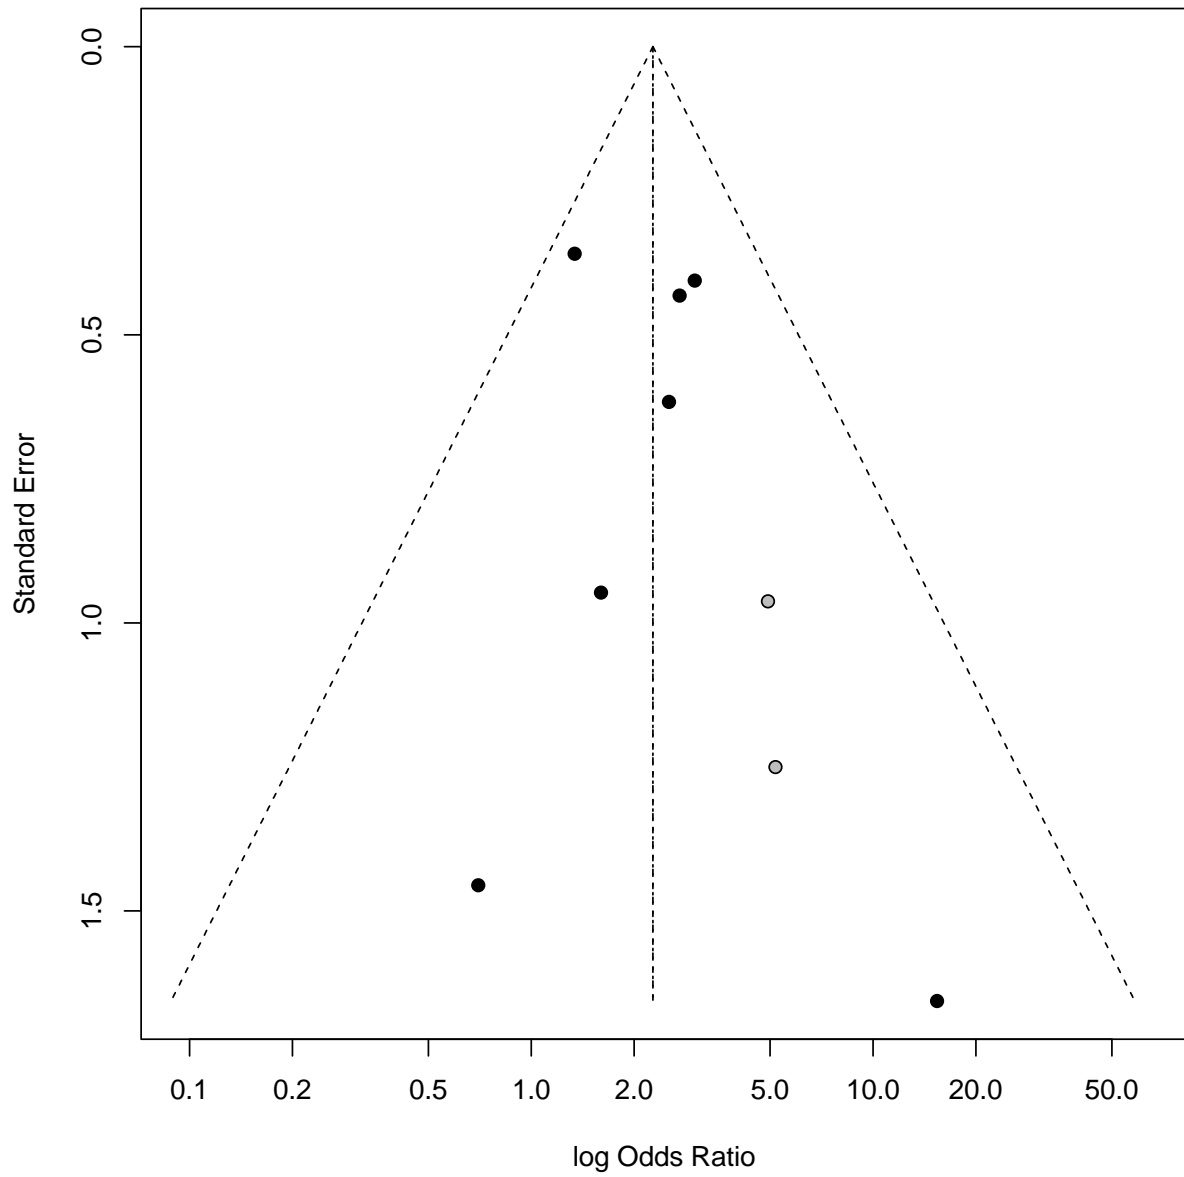

e-Figure 32

## [1] "Eggers test not available for less than 10 studies"

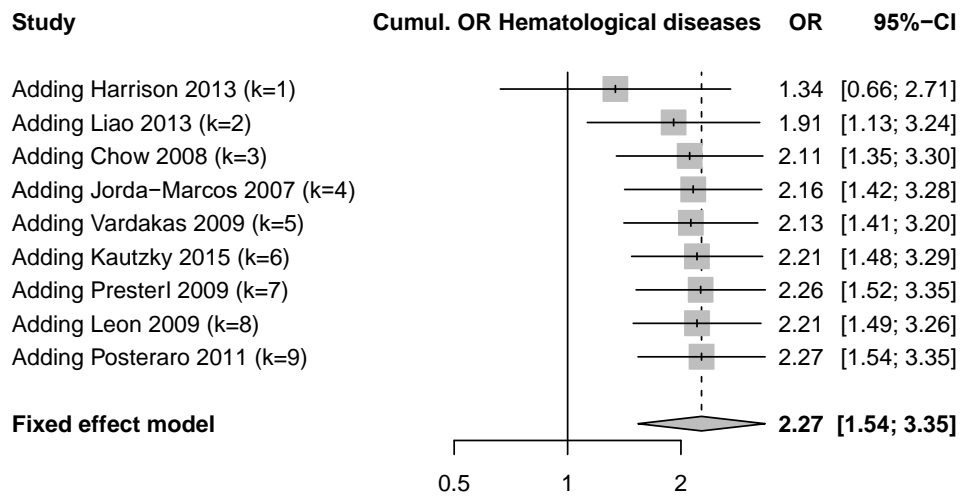

e-Figure 33

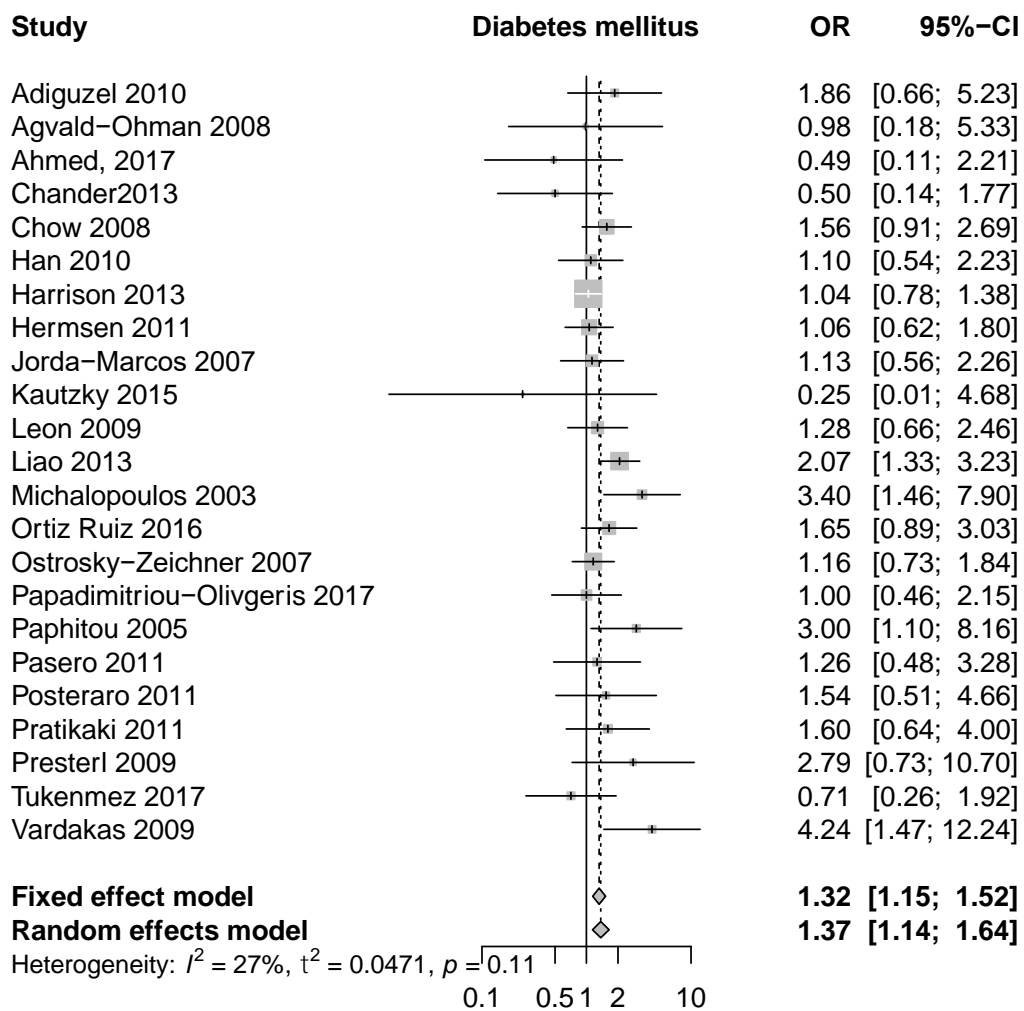

e-Figure 34

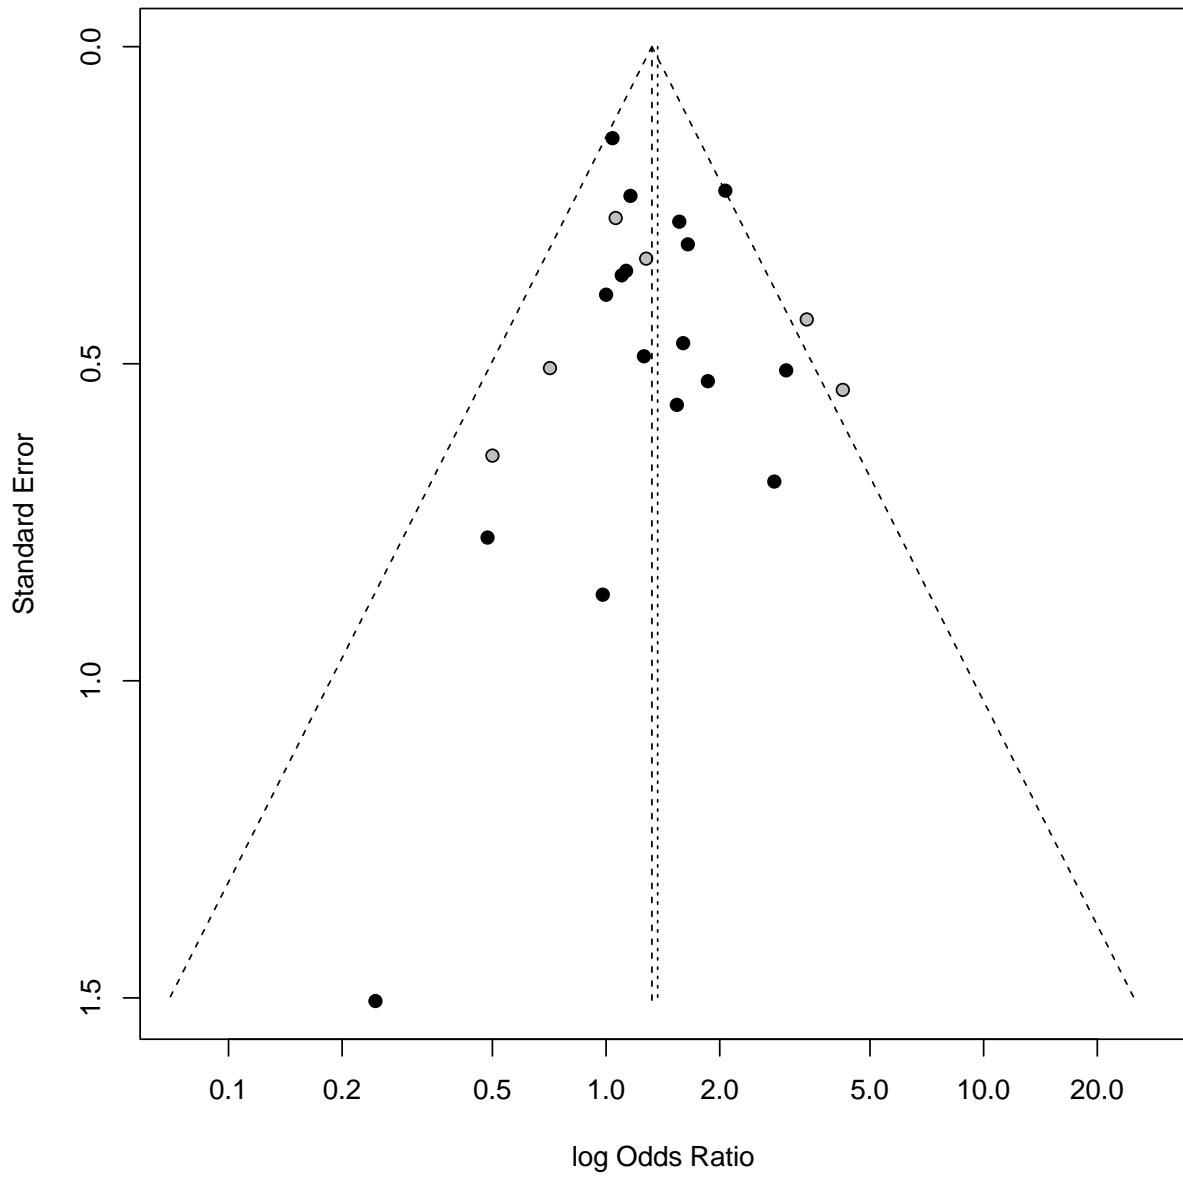

e-Figure 35

## [1] "p-value for Funnel-plot asymmetry (Eggers-test): 0.642"

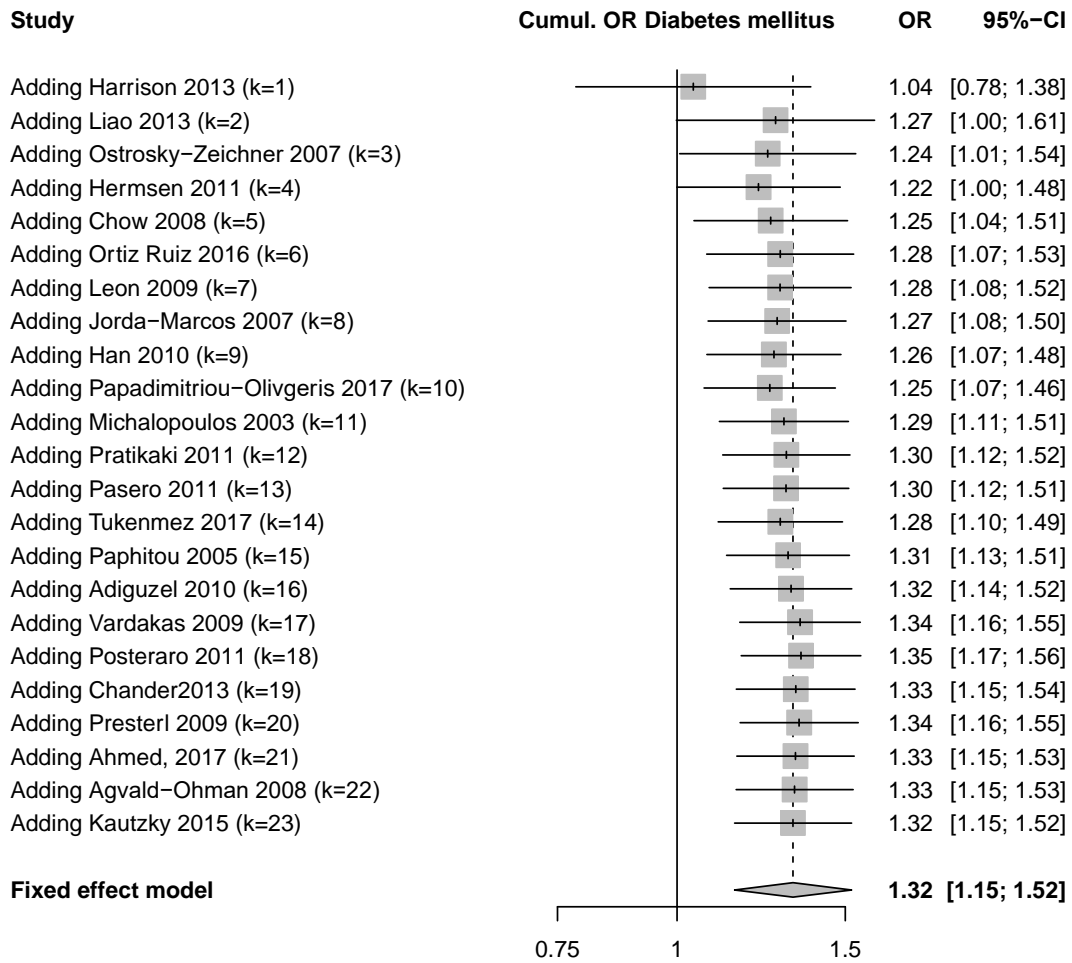

e-Figure 36

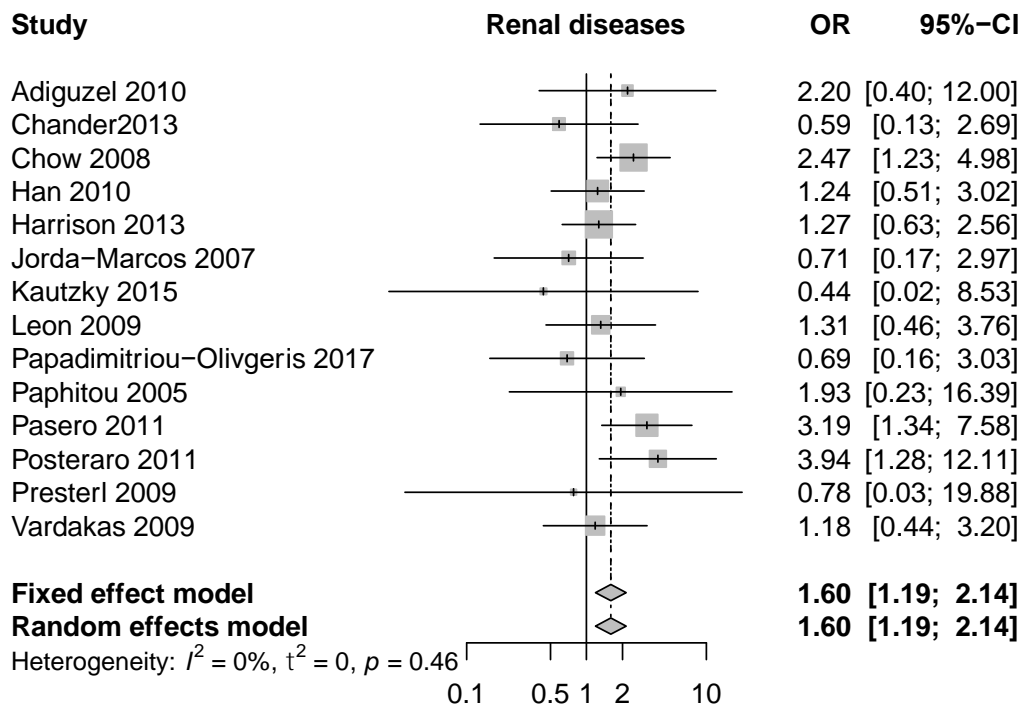

Creatinine > 2mg/dl in Pasero 2011  
 Chronic renal failure in Papadimitriou-Olivgeris 2017 & Posteraro 2011

e-Figure 37

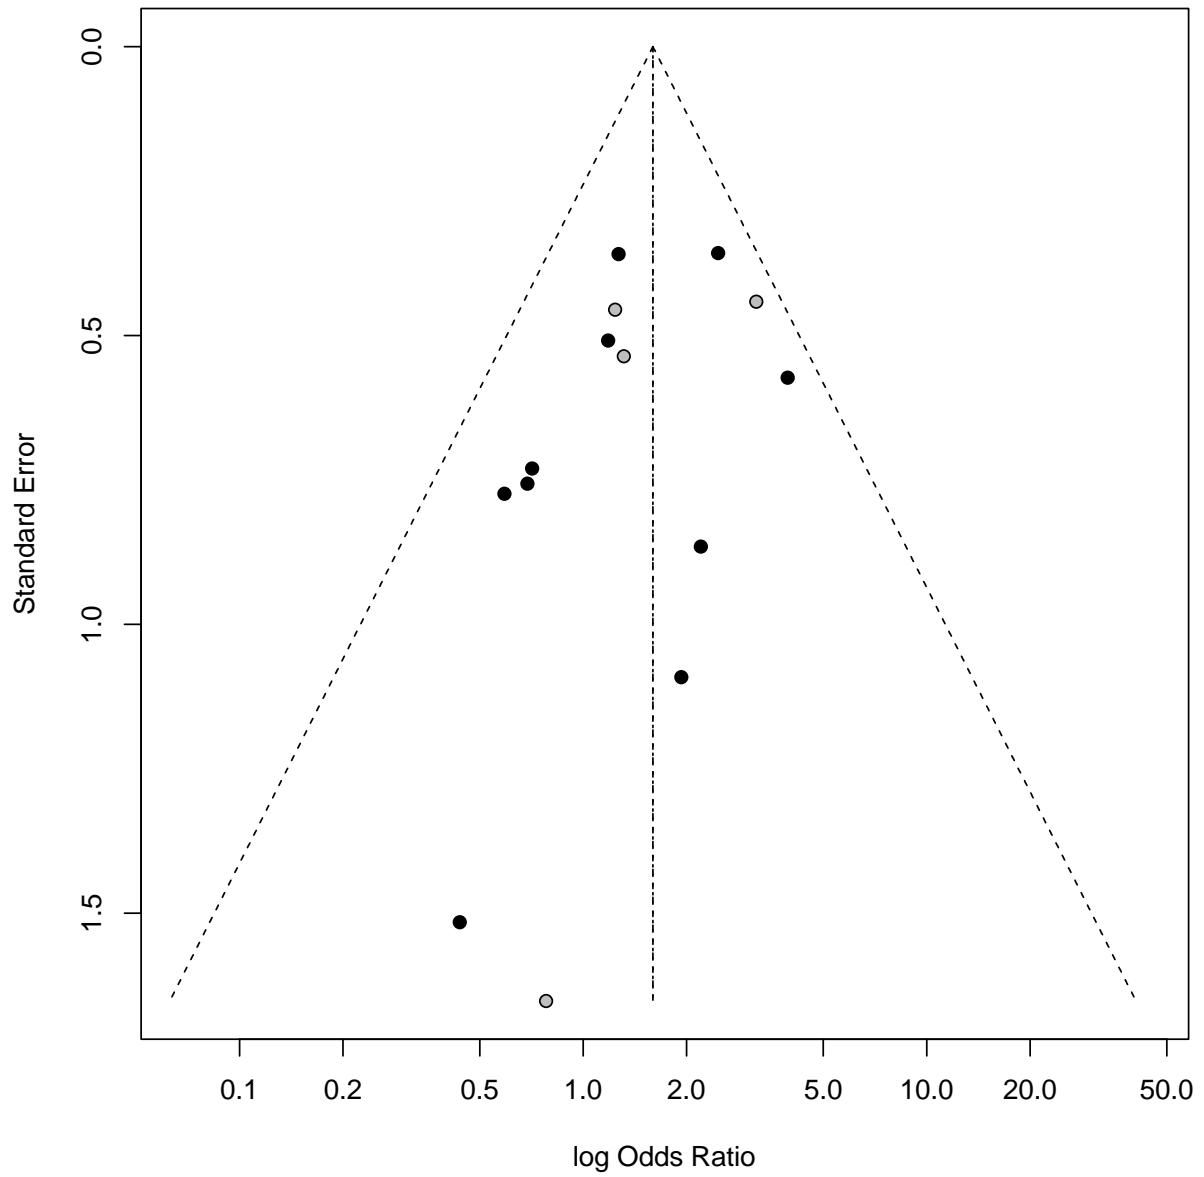

e-Figure 38

## [1] "p-value for Funnel-plot asymmetry (Eggers-test): 0.166"

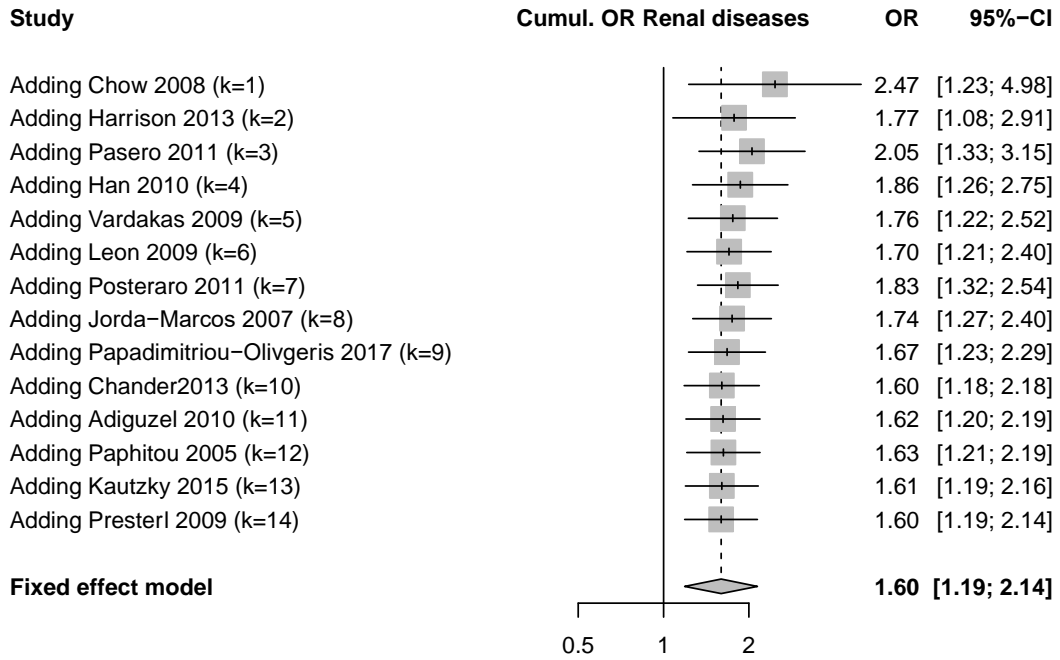

e-Figure 39



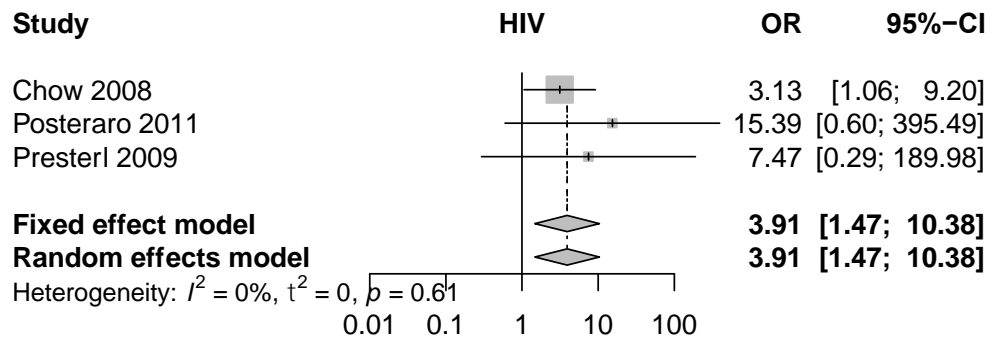

e-Figure 40

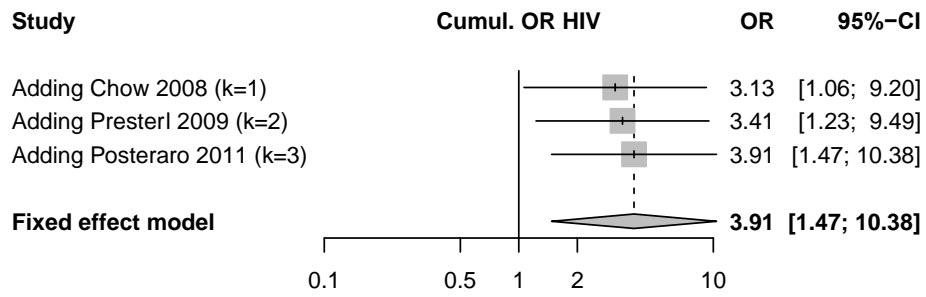

e-Figure 41

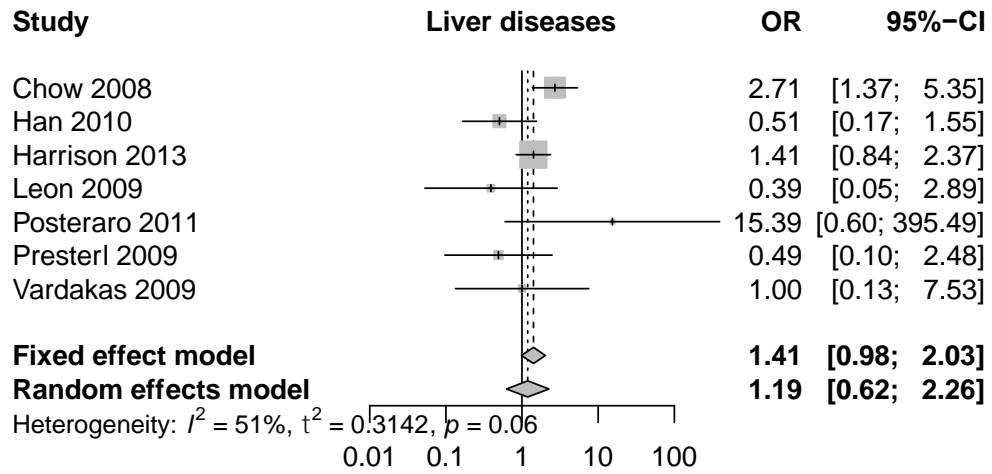

Only cirrhosis in Chowl 2009 & Posteraro 2011

e-Figure 42

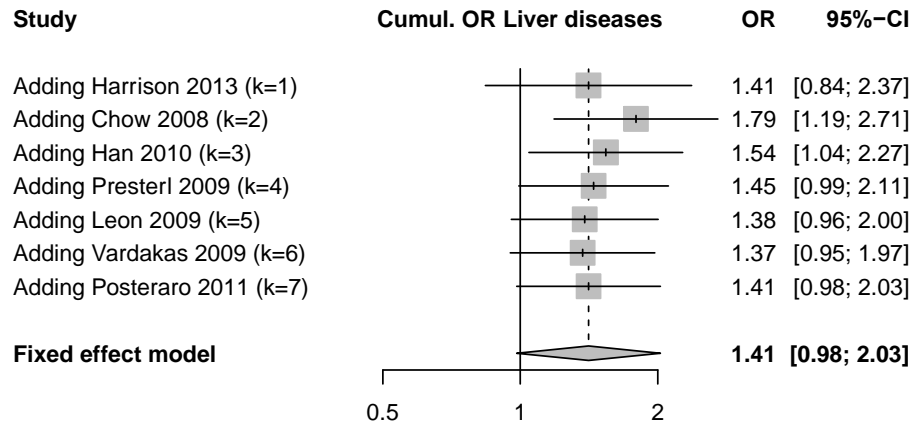

e-Figure 43

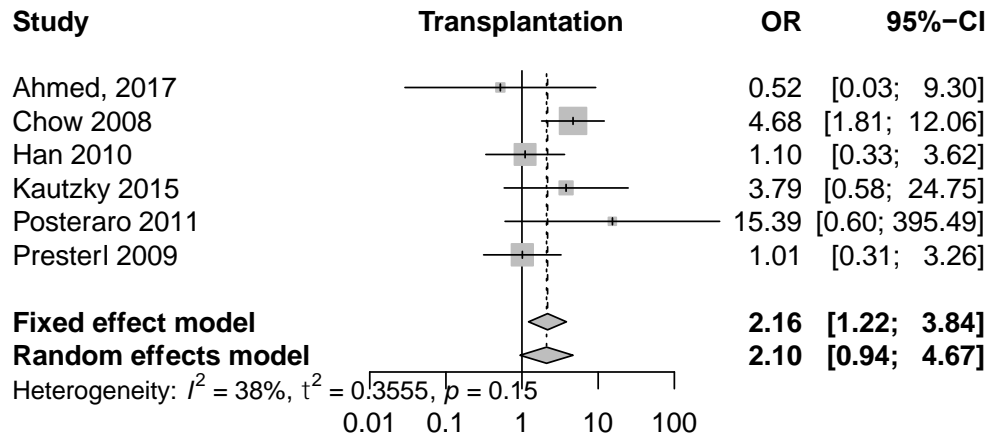

e-Figure 44

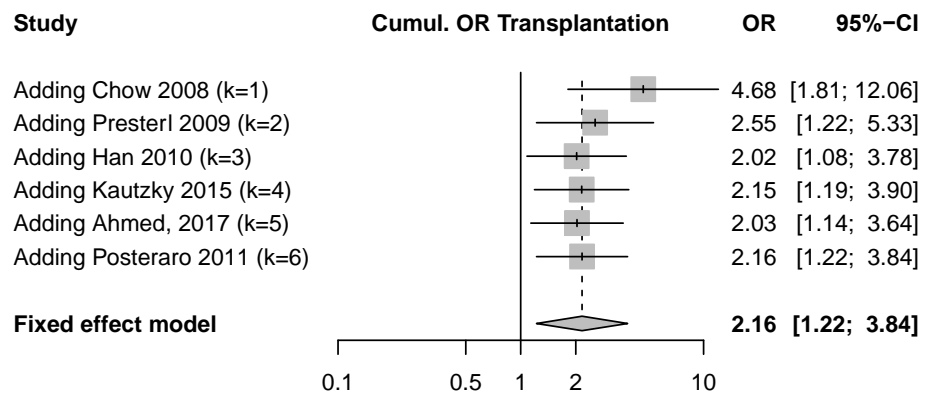

e-Figure 45

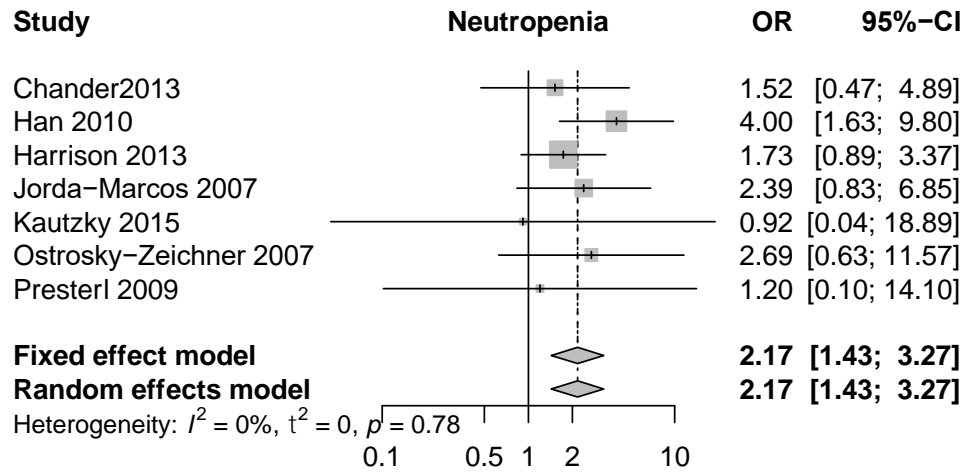

e-Figure 46

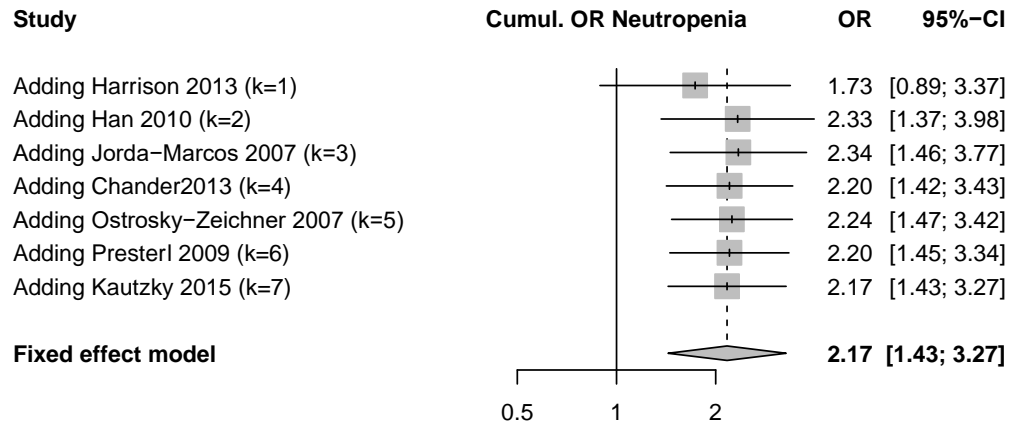

e-Figure 47



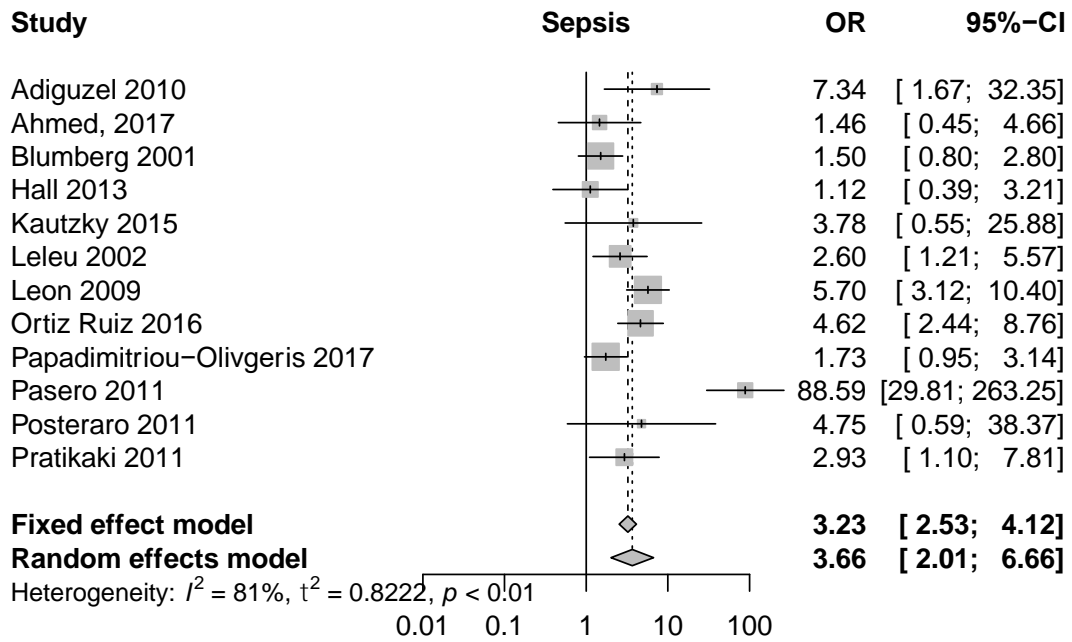

ARDS in Blumberg 2001 & Leleu 2002  
 severe sepsis in Hall 2013 & Pasero 2011  
 severe sepsis/septic shock in Leon 2009, Ortiz Ruiz 2016 & Posteraro 2011  
 KPC shock and sepsis in Papadimitriou-Olivgeris 2017

e-Figure 48

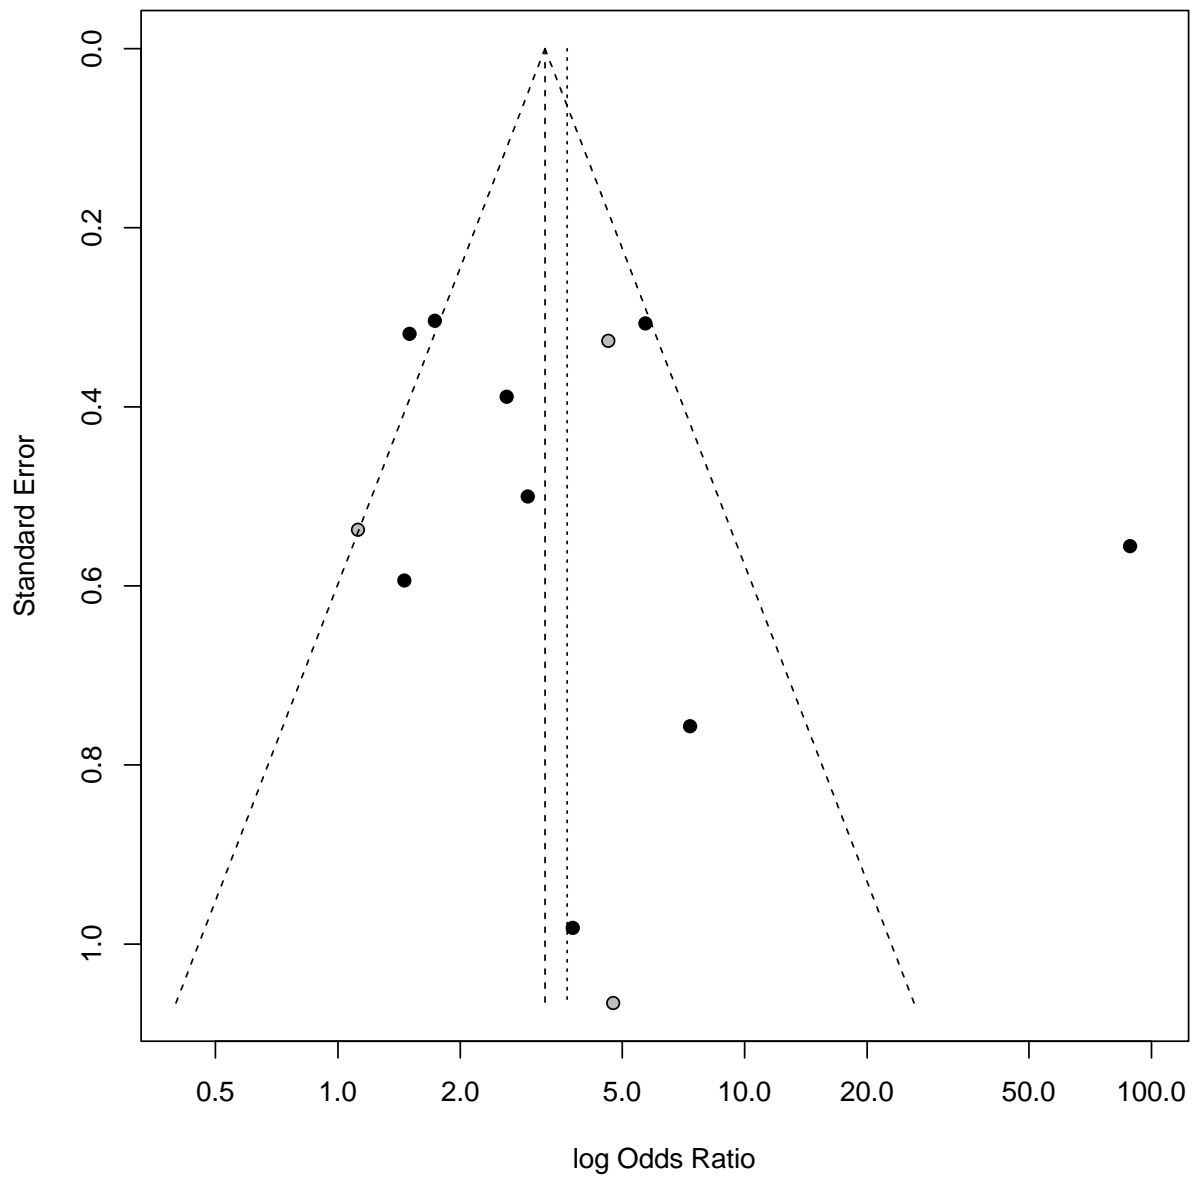

e-Figure 49

## [1] "p-value for Funnel-plot asymmetry (Eggers-test): 0.512"

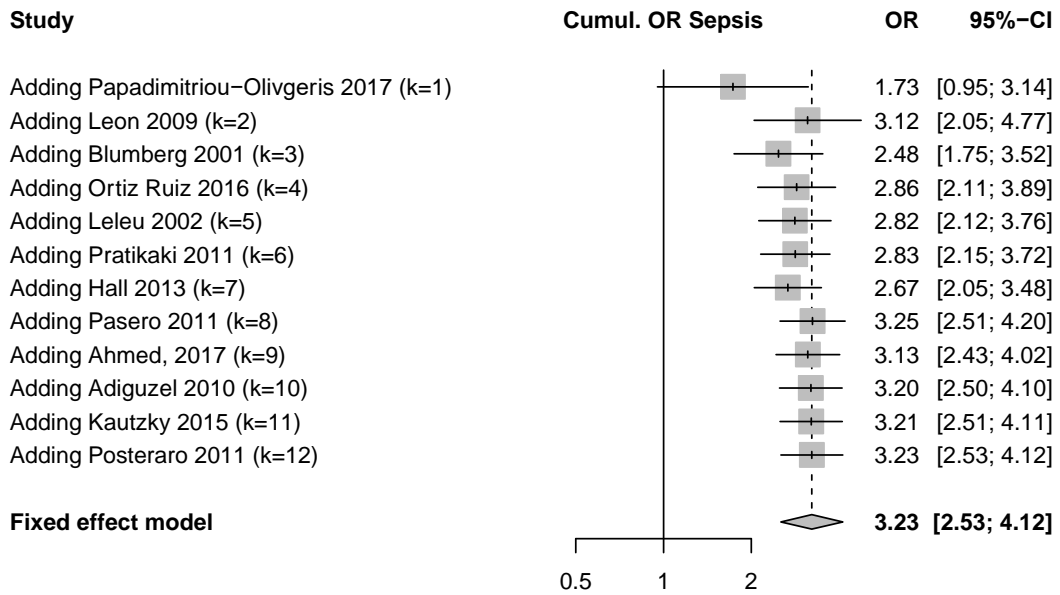

e-Figure 50

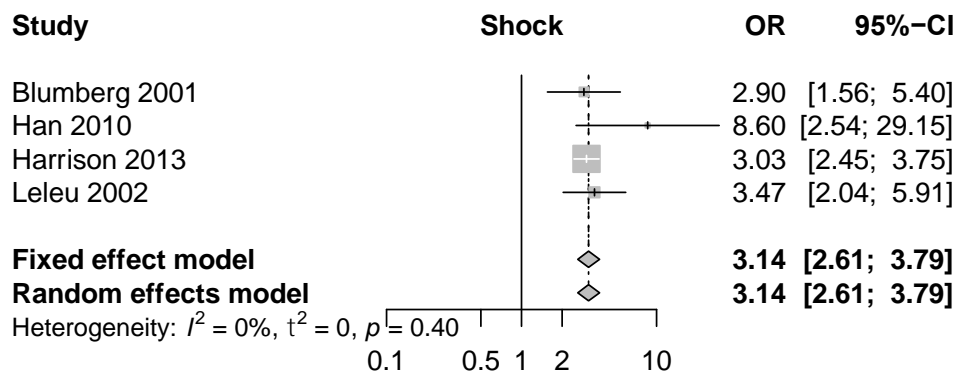

hemodynamic instability in Han 2010  
 advanced cardiovascular support in Harrison 2013

e-Figure 51

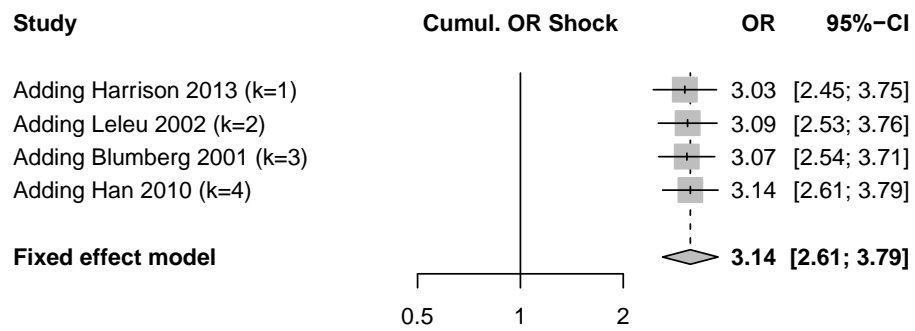

e-Figure 52

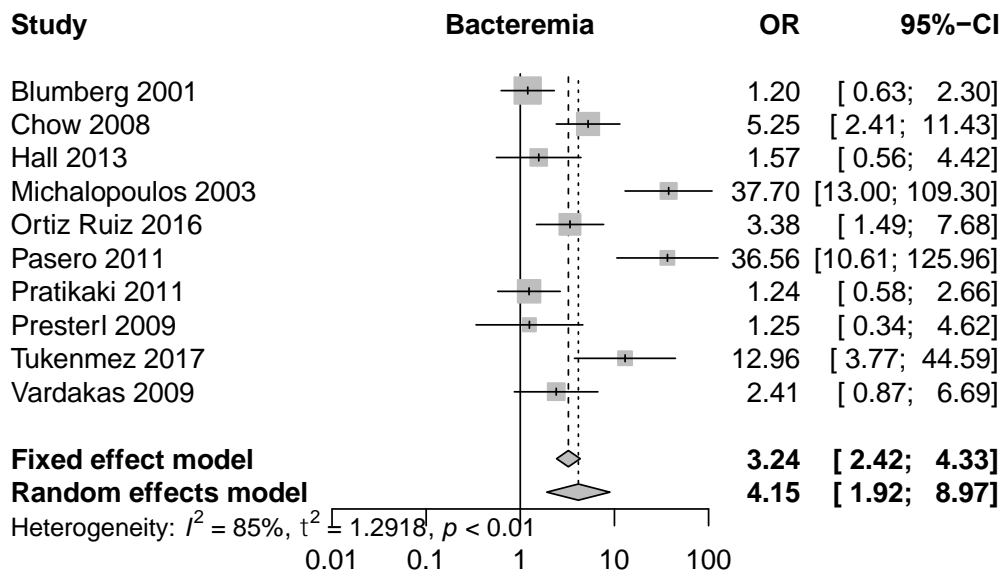

e-Figure 53

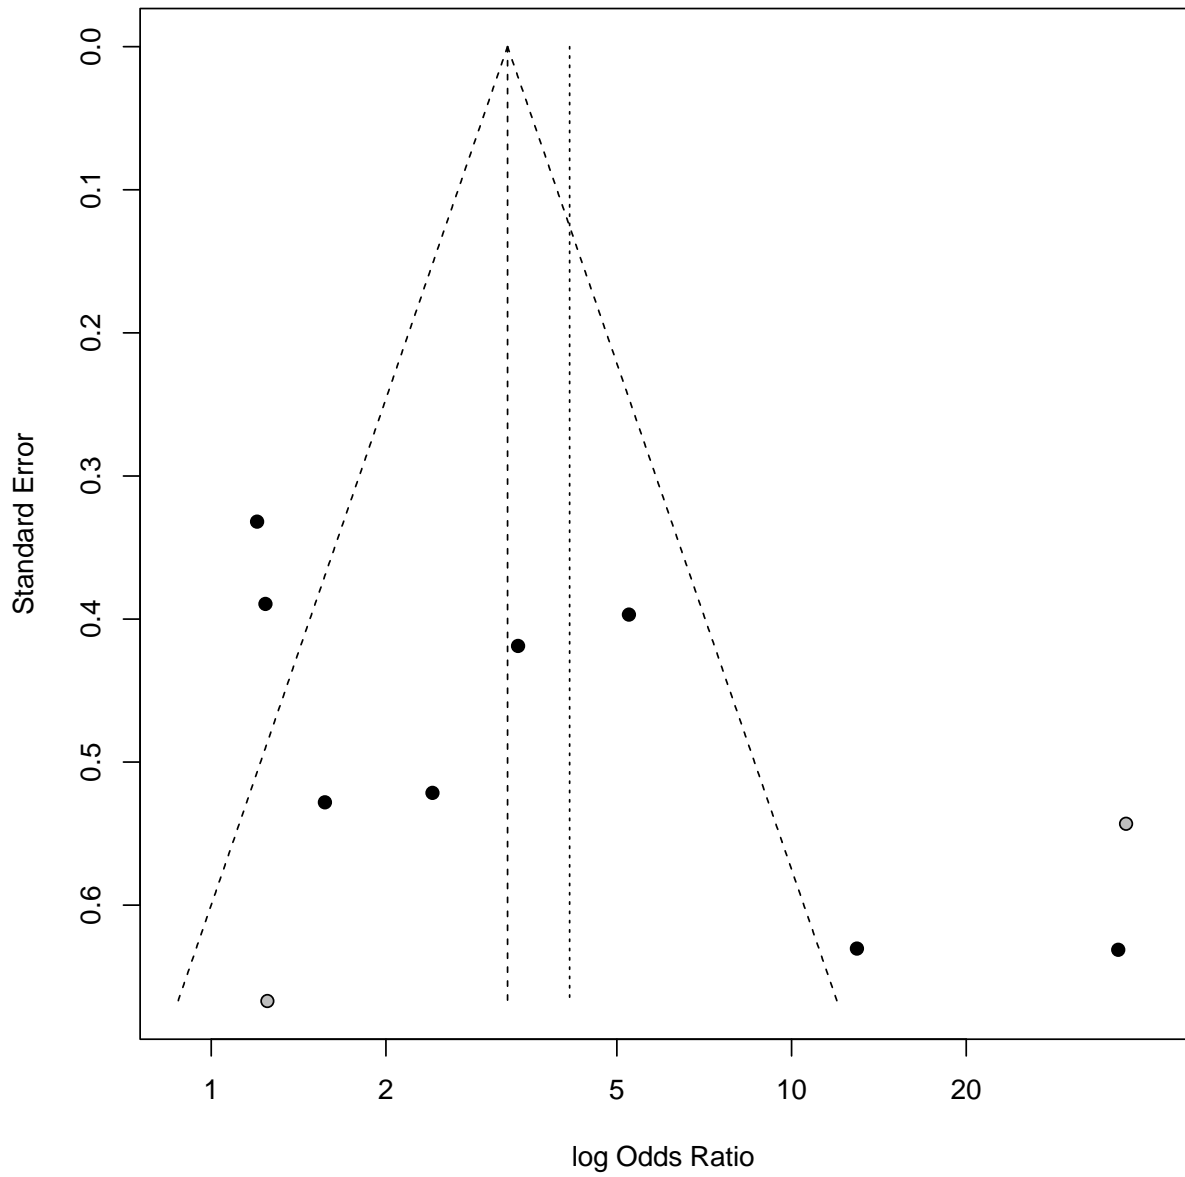

e-Figure 54

## [1] "p-value for Funnel-plot asymmetry (Eggers-test): 0.104"

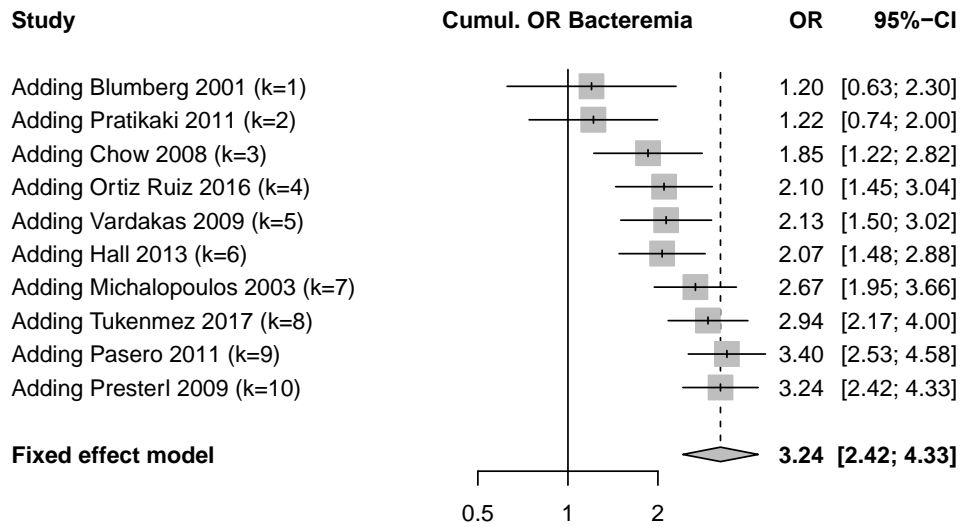

e-Figure 55



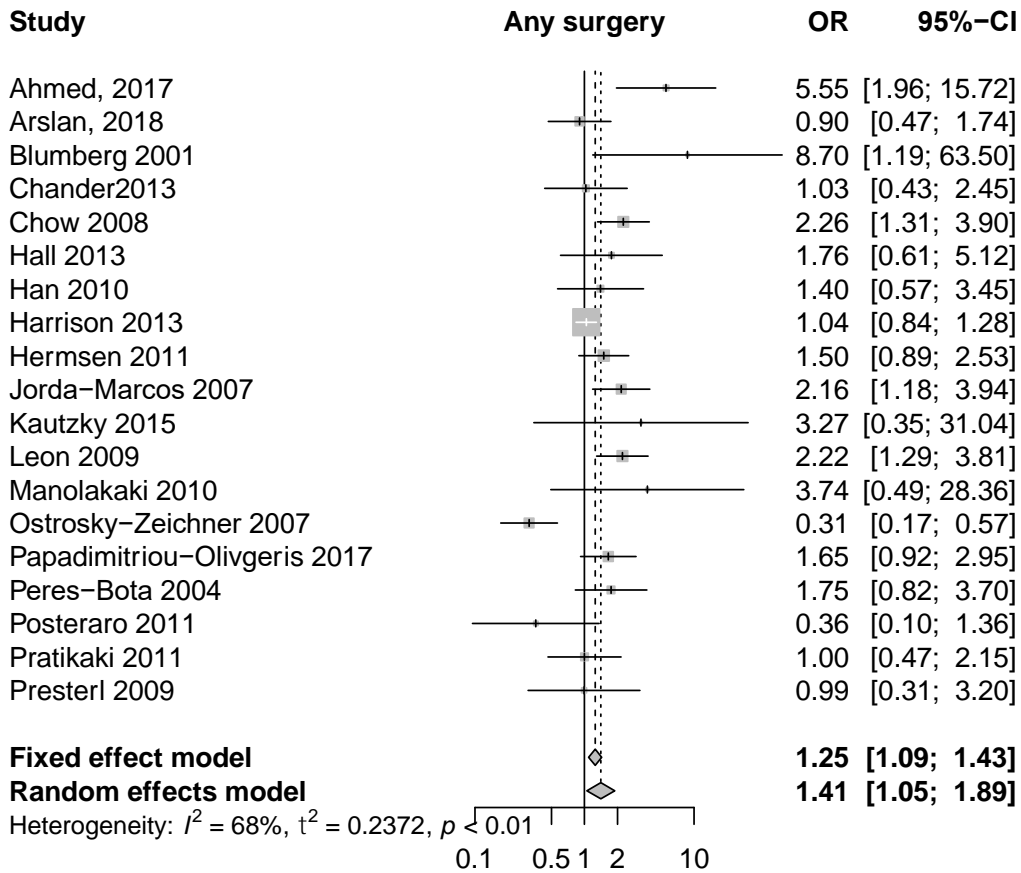

**e-Figure 56** major surgery in Chander 2013  
major pre-ICU operation in Chow 2008  
day -7-3 used from Hermesen 2011  
elective surgery in Jorda-Marcos 2007  
at least 1 surgery in Leon 2009  
d1-3 used from Ostrosky-Zeichner 2007  
previous emergency surgery in Papadimitriou-Olivgeris 2017  
trauma and surgical admission in Posteraro 2011

Ortiz-Ruiz 2016 reports an OR of 1.1 [0.7; 2.1] for other surgeries and 0.8 [0.5; 1.5] for cardiovascular surgery; as numbers with abdominal surgery add up to more than 100% no pooling was performed.

All patients had cardiac surgery in Michalopoulos 2003

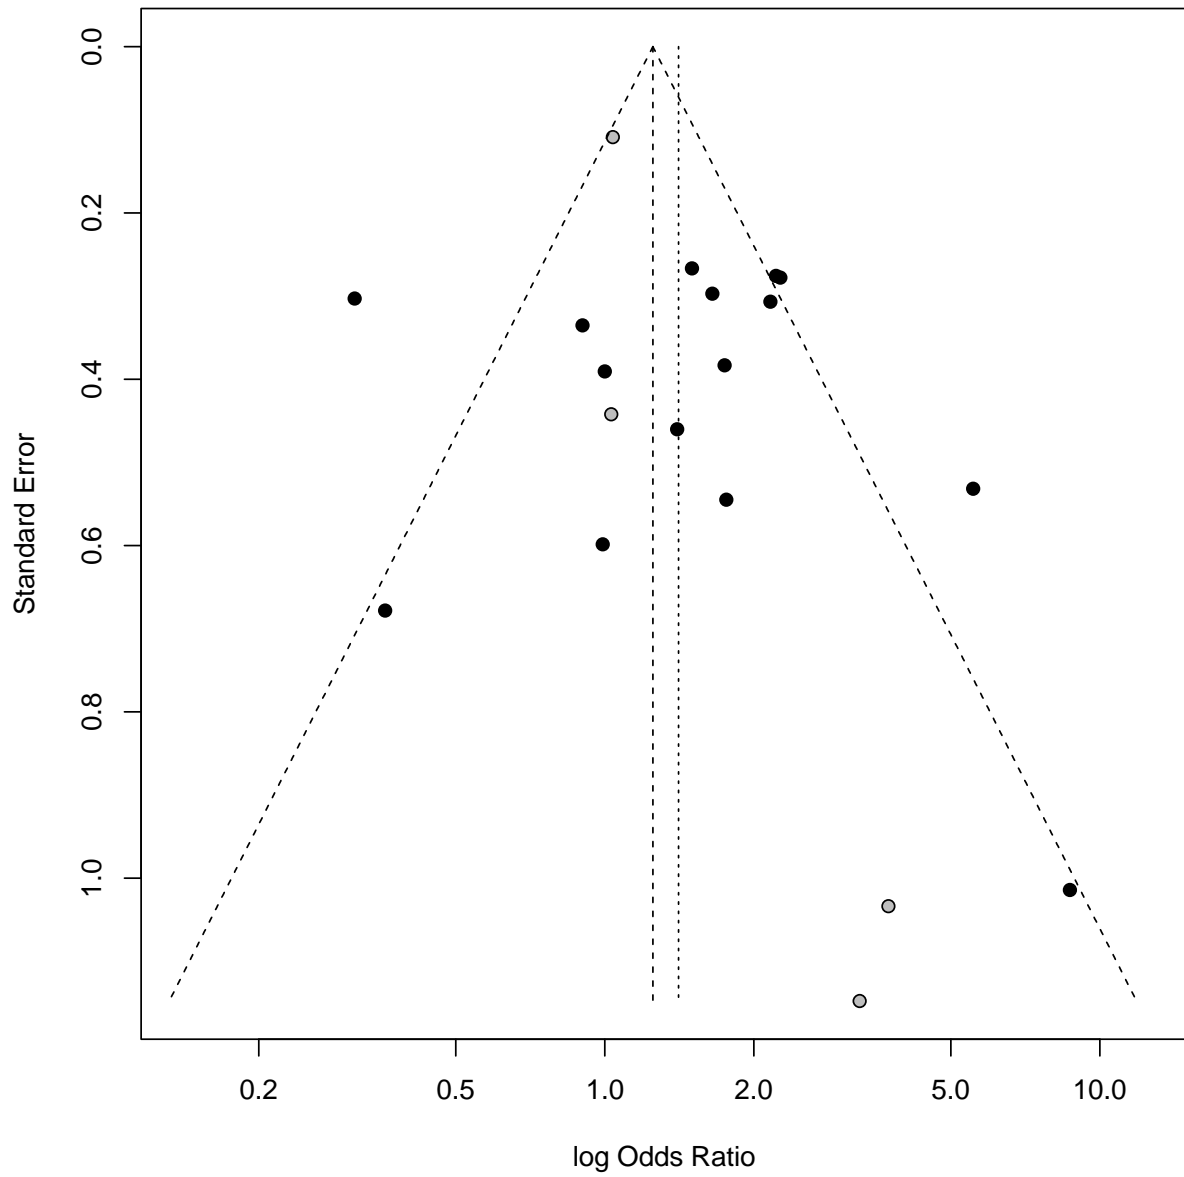

e-Figure 57

## [1] "p-value for Funnel-plot asymmetry (Eggers-test): 0.201"

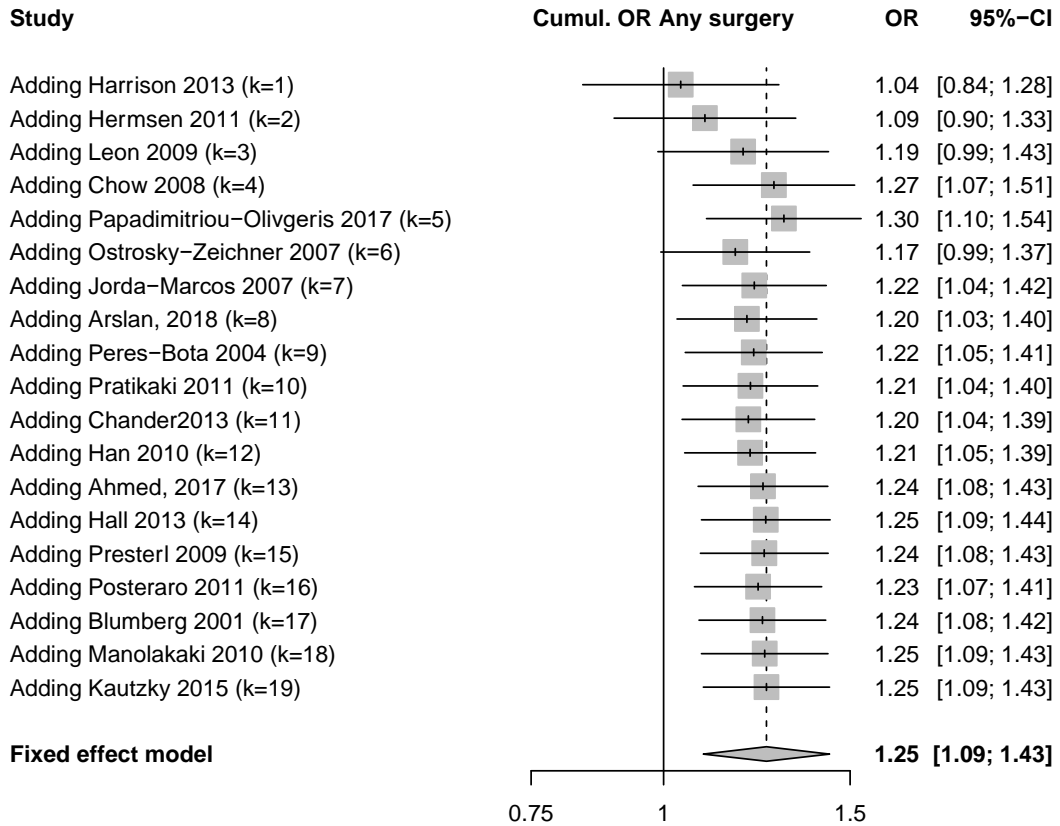

e-Figure 58

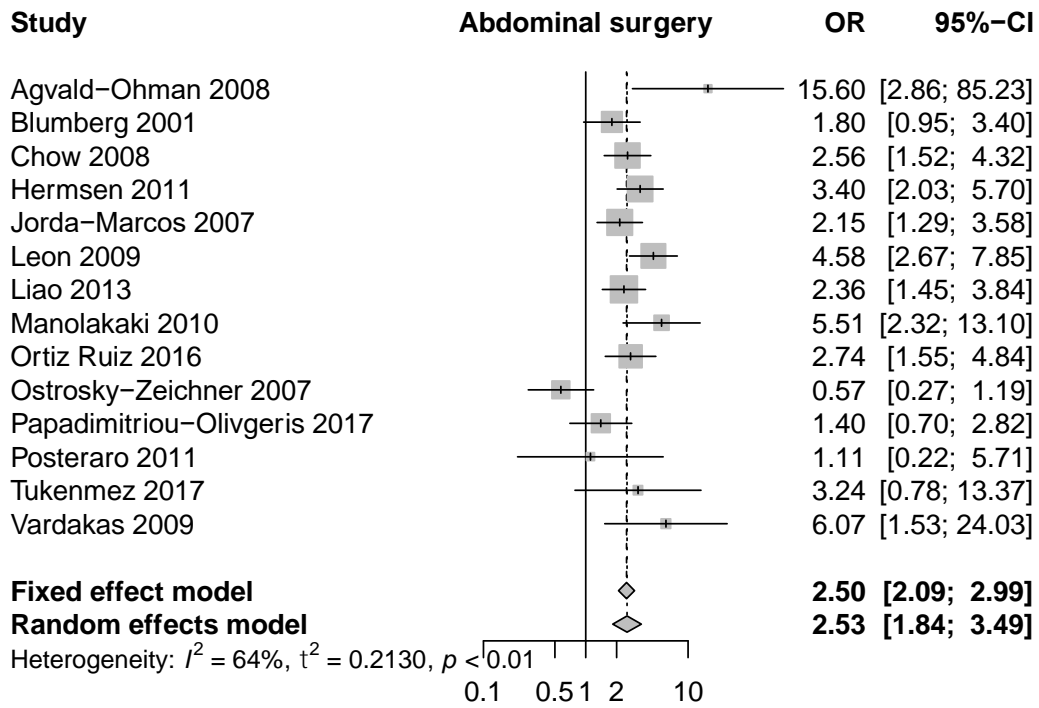

extensive gastro-abdominal surgery in Agvald-Ohman 2008  
 laparotomy in Manonalaki 2010  
 d1-3 used from Ostrosky-Zeichner 2007

e-Figure 59

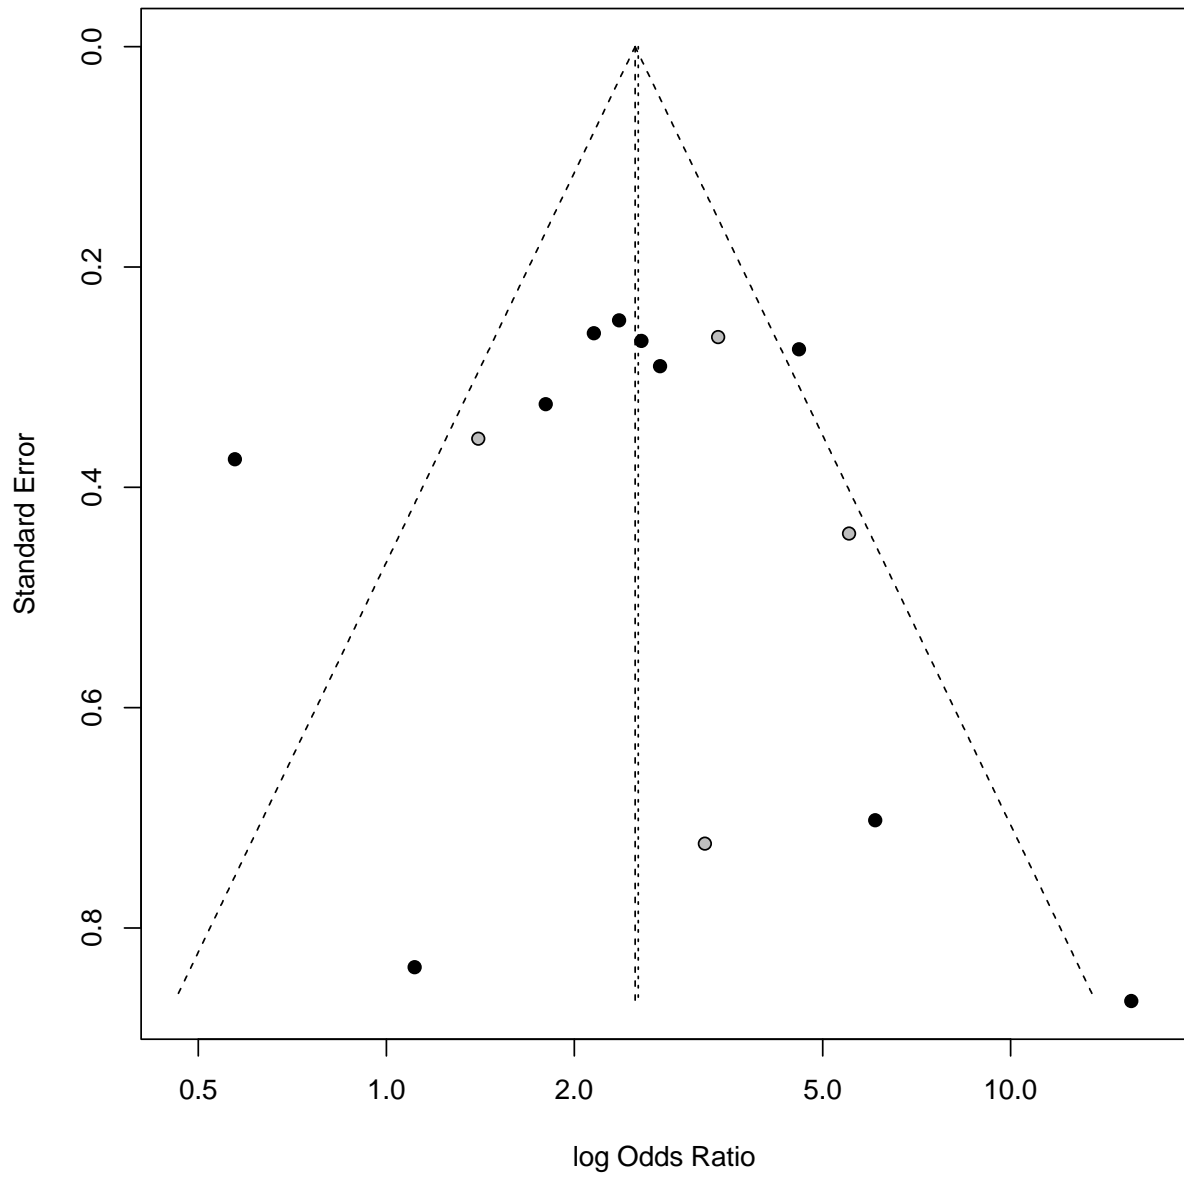

e-Figure 60

## [1] "p-value for Funnel-plot asymmetry (Eggers-test): 0.701"

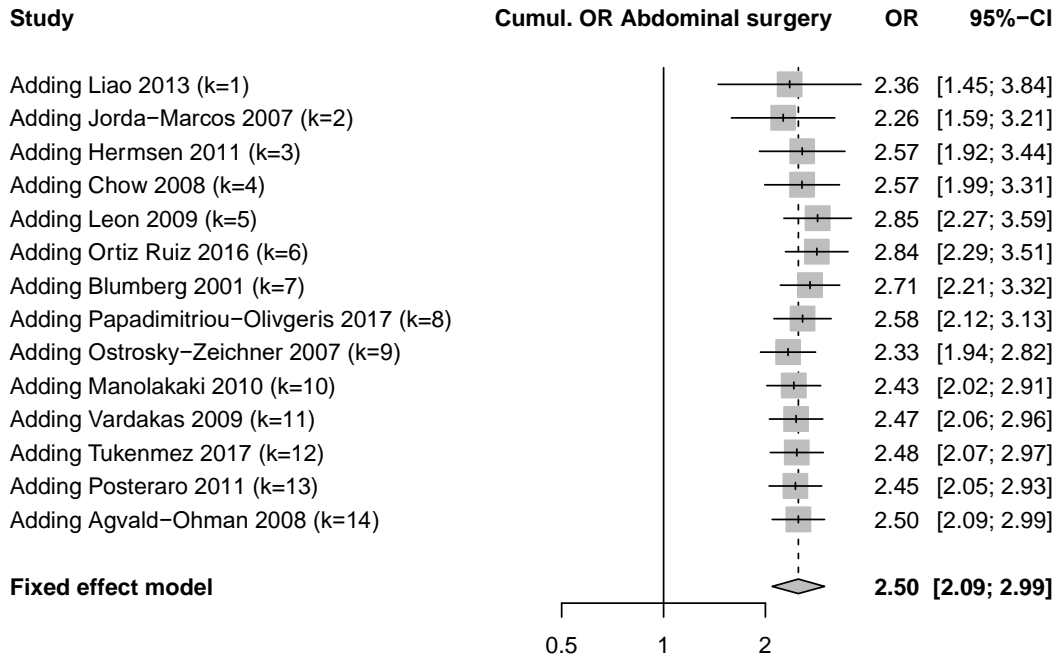

e-Figure 61

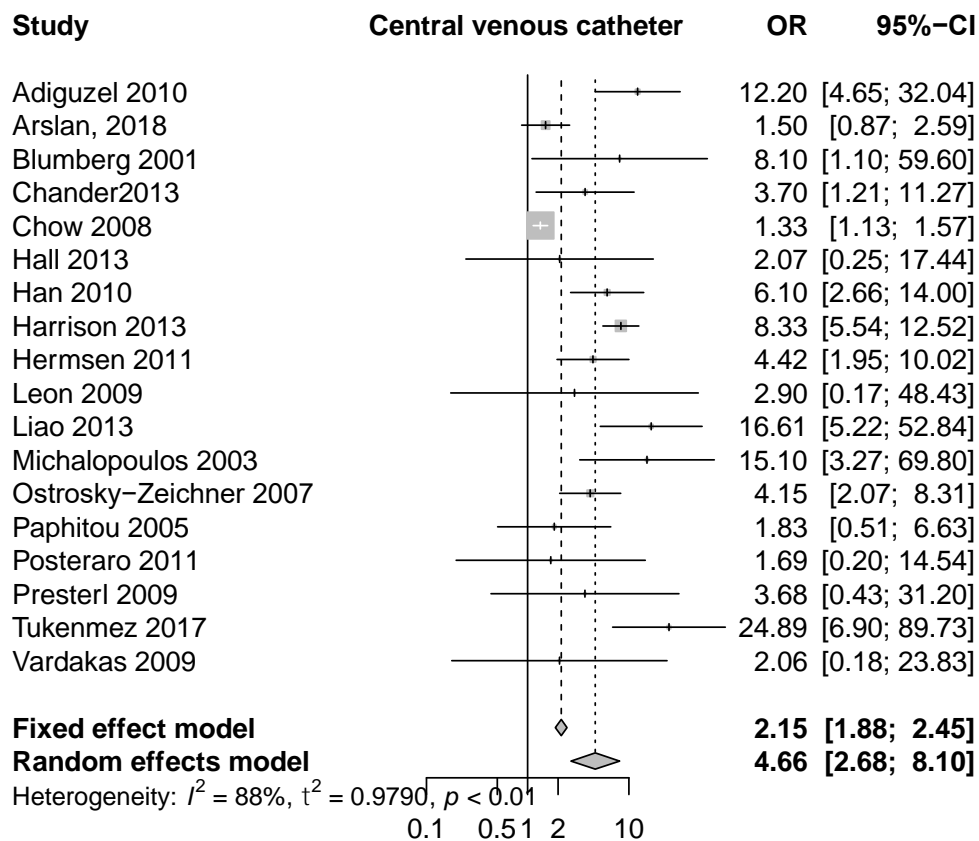

per day at risk in Chow 2008  
 $\geq 72$  hours in Michalopoulos 2003  
d1-3 used from Ostrosky-Zeichner 2007

All patients reported to have a CVC by Kautzky 2015

e-Figure 62

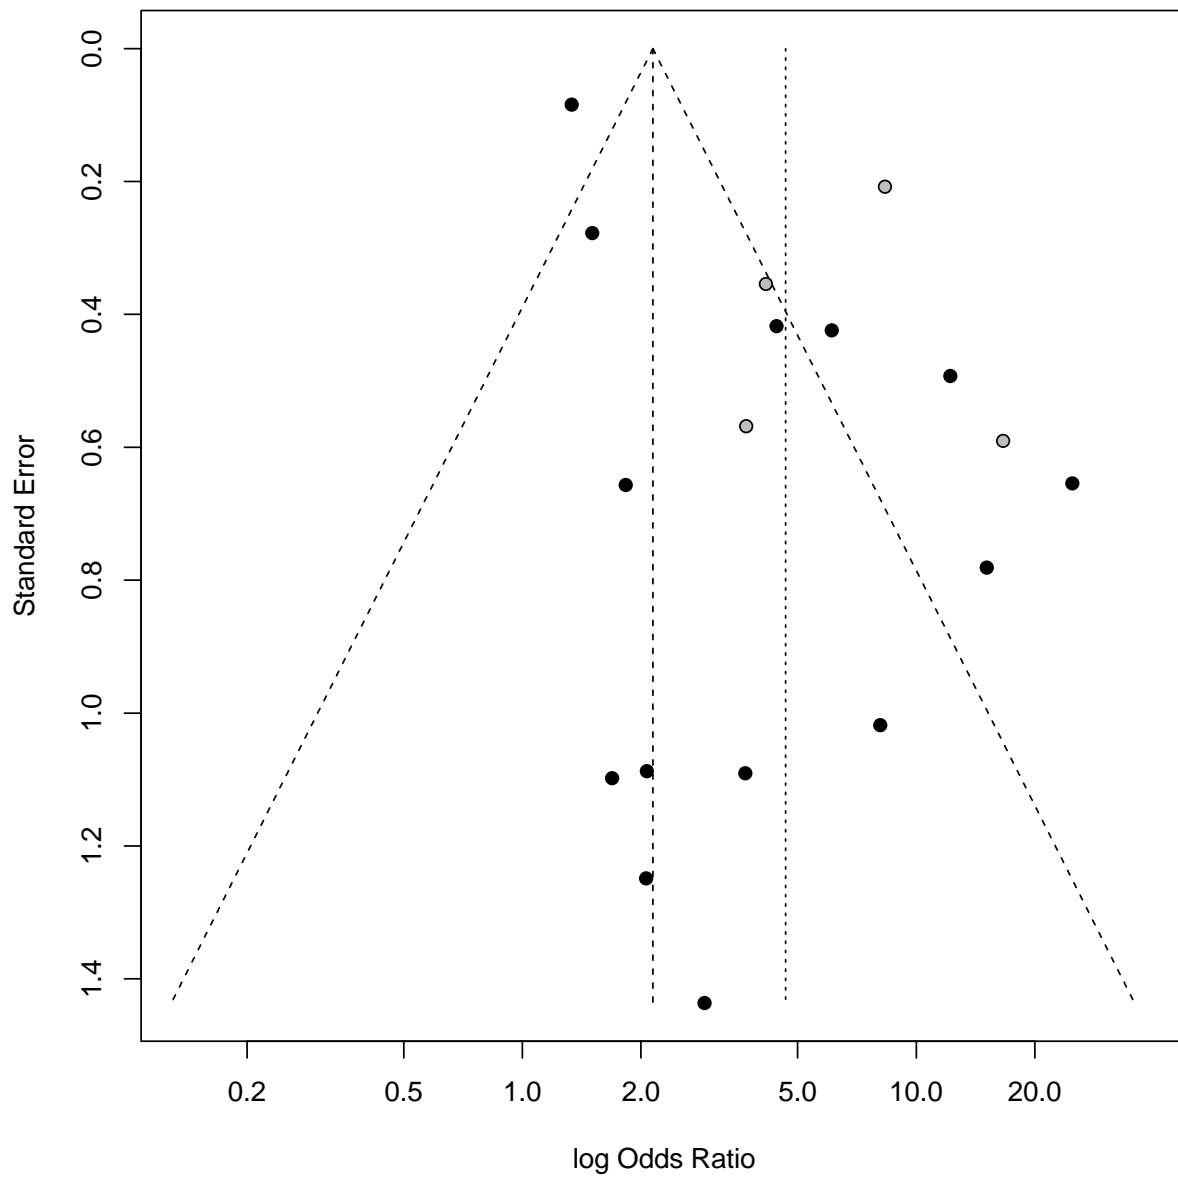

e-Figure 63

## [1] "p-value for Funnel-plot asymmetry (Eggers-test): 0.01"

Might be caused by the day at risk information with low OR from Chow



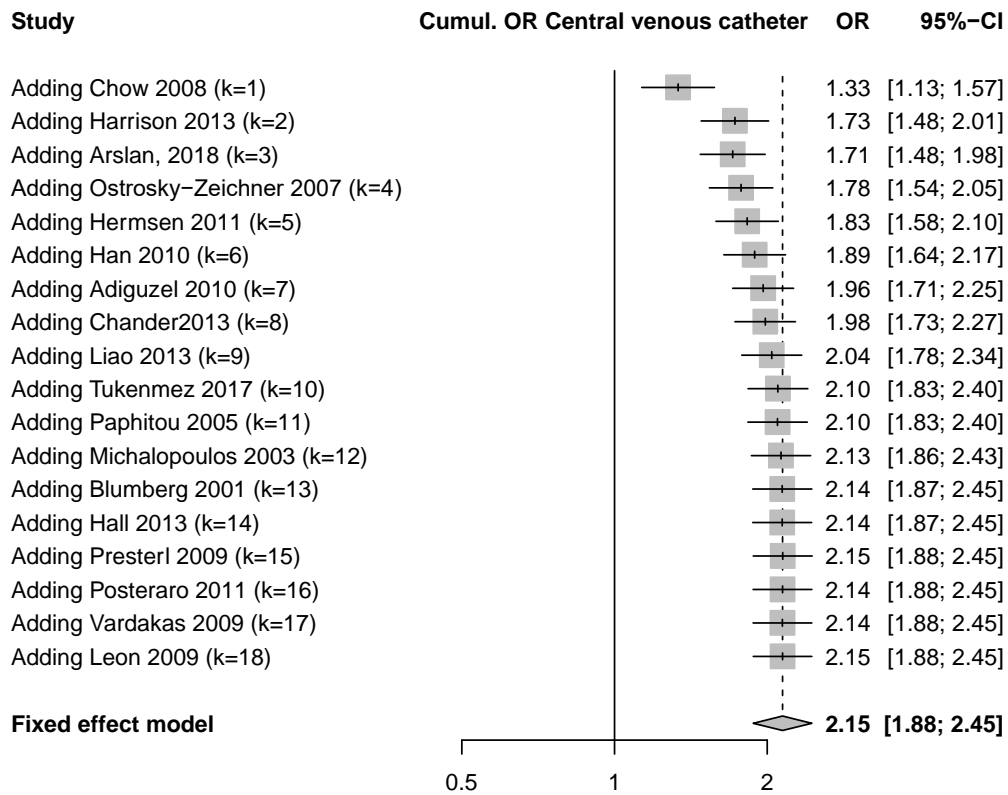

e-Figure 64

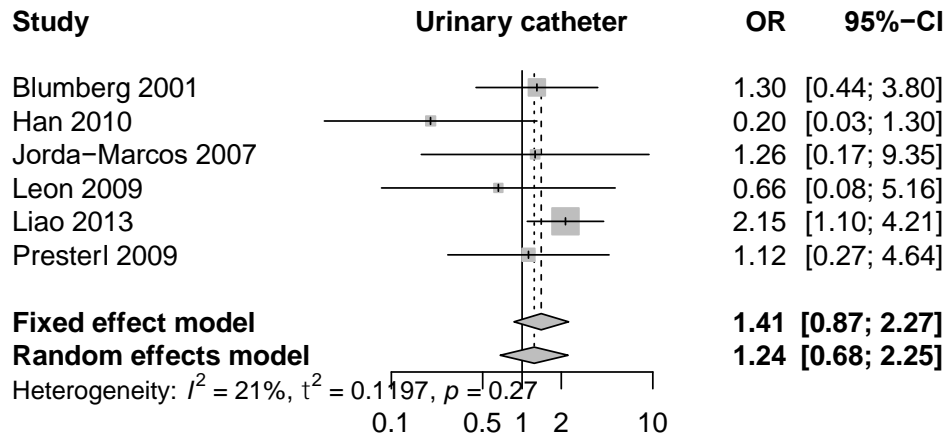

e-Figure 65

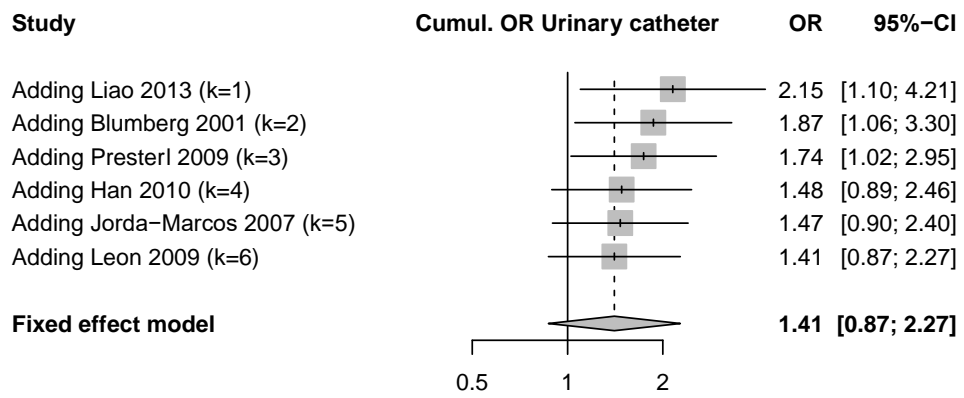

e-Figure 66

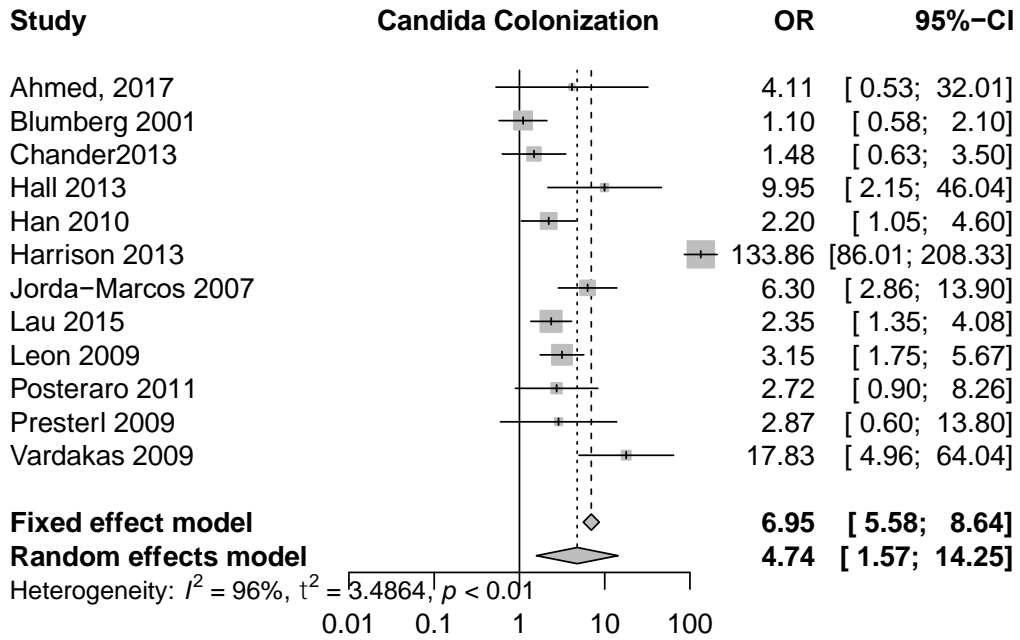

multifocal in Ahmed 2017  
 urine+rectal used from Blumberg 2001  
 urine in Chander 2013  
 colonization identified in unit from Harisson 2013  
 any site colonized, timepoint 1 used from Lau 2015

e-Figure 67

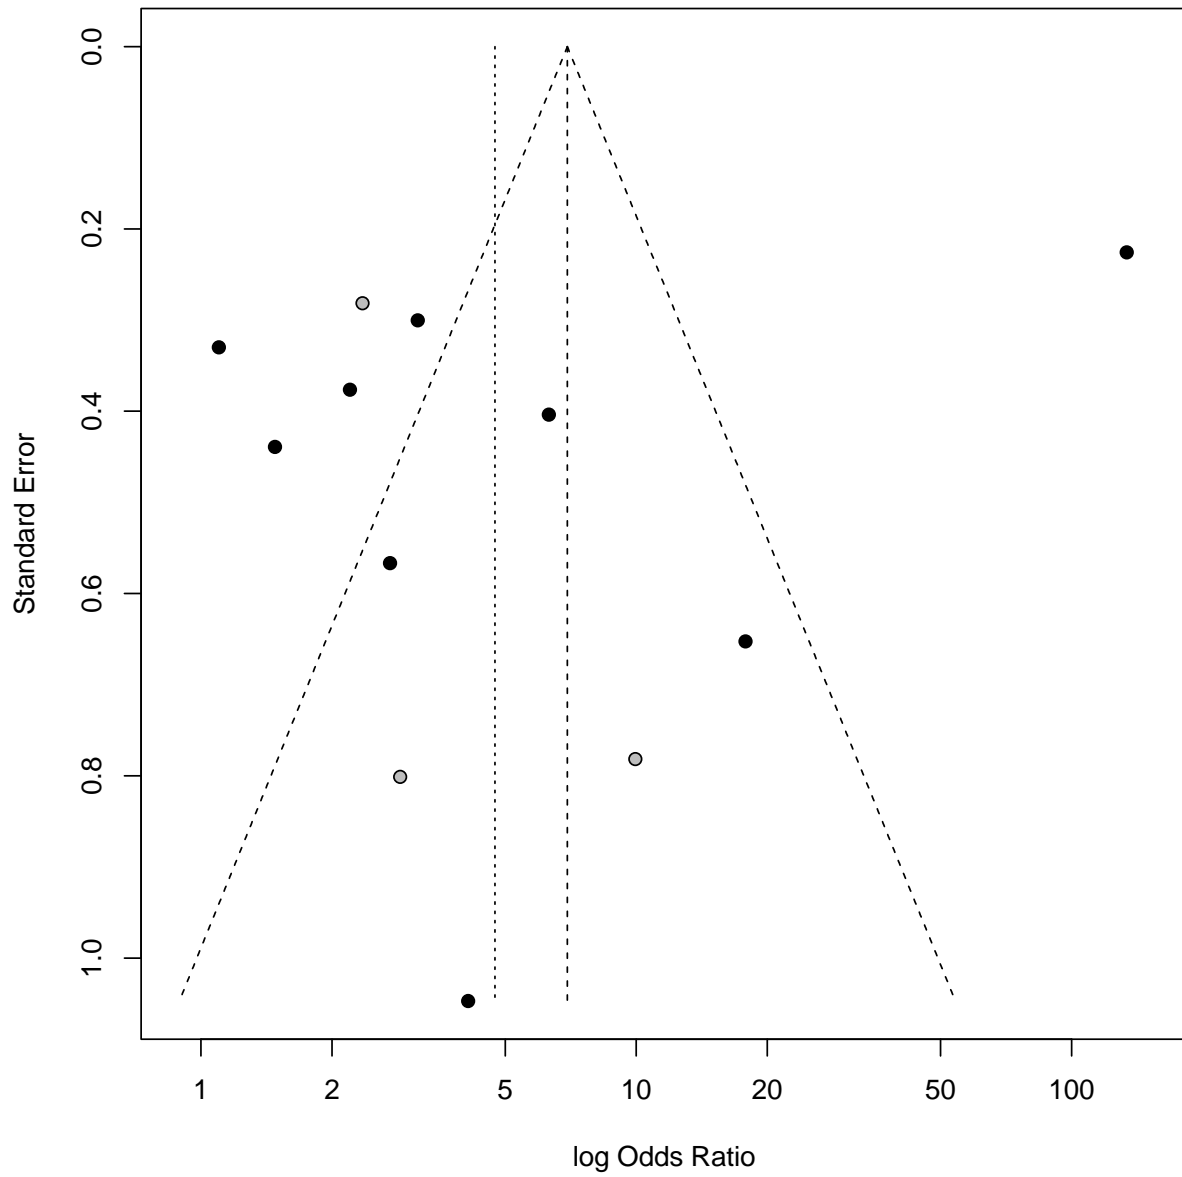

e-Figure 68

## [1] "p-value for Funnel-plot asymmetry (Eggers-test): 0.3"

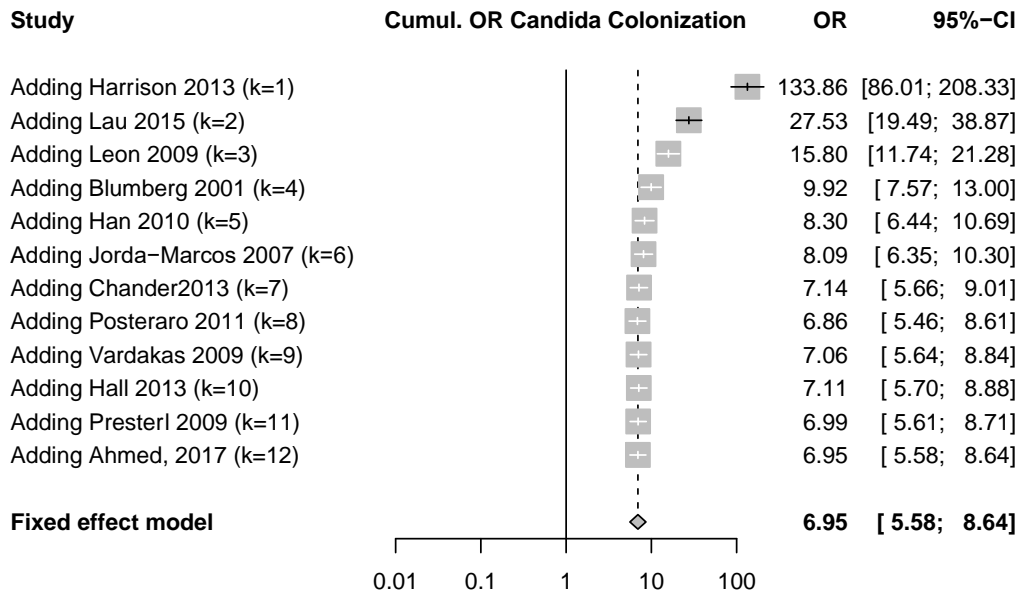

e-Figure 69

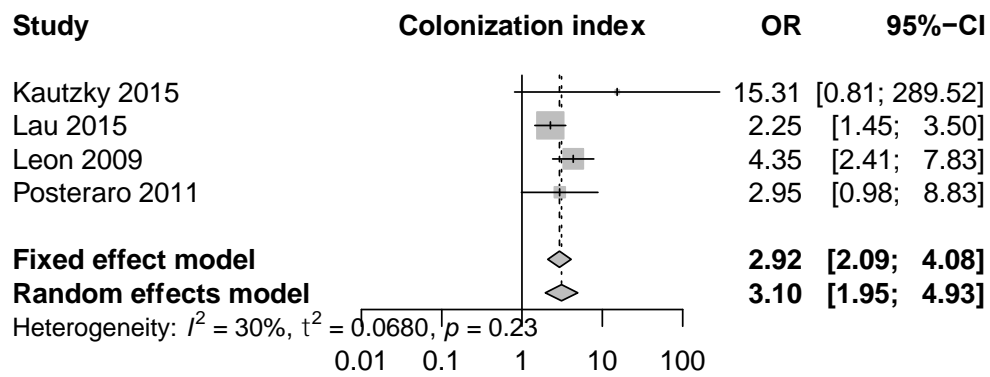

CCI  $\geq 0.5$  in Kautzky 2015, Leon 2009 & Posteraro 2011  
 CCI  $> 0.5$  at timepoint 1 taken from Lau 2015

0.6 $\pm$ 0.3 points vs. 0.4 $\pm$ 0.3 (p=0.04) in Ahmed 2017

e-Figure 70

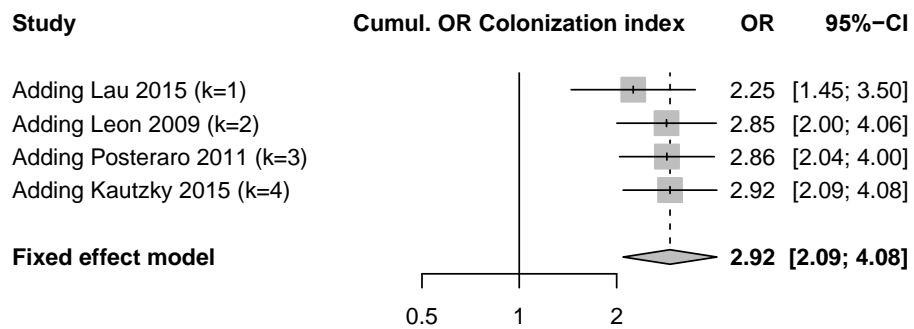

**e-Figure 71**



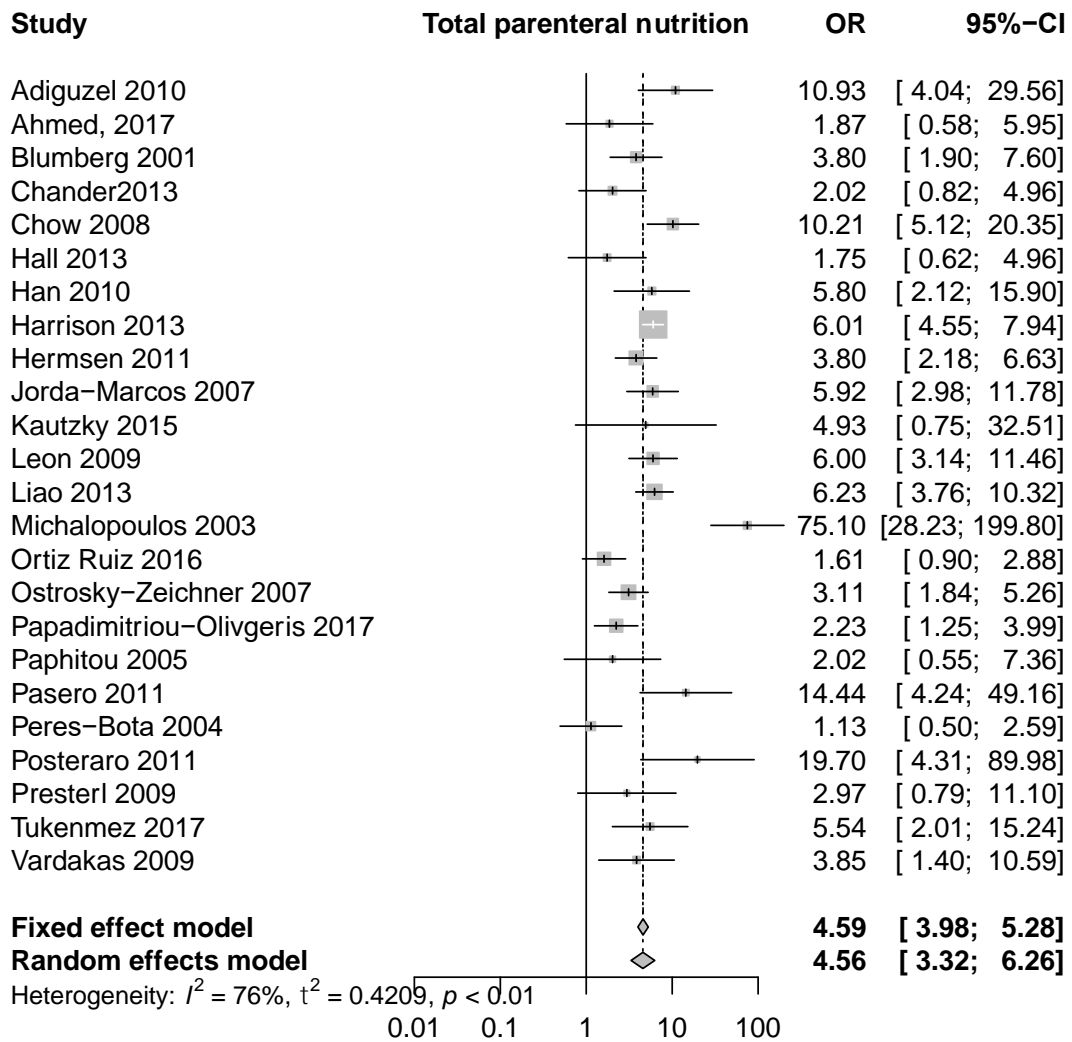

per day at risk in Chow 2008  
D 1-3 taken form Ostrosky-Zeichner 2017

**e-Figure 72**  
12±17 days vs. 1±4 (p=0.004) in Manonalaki 2010

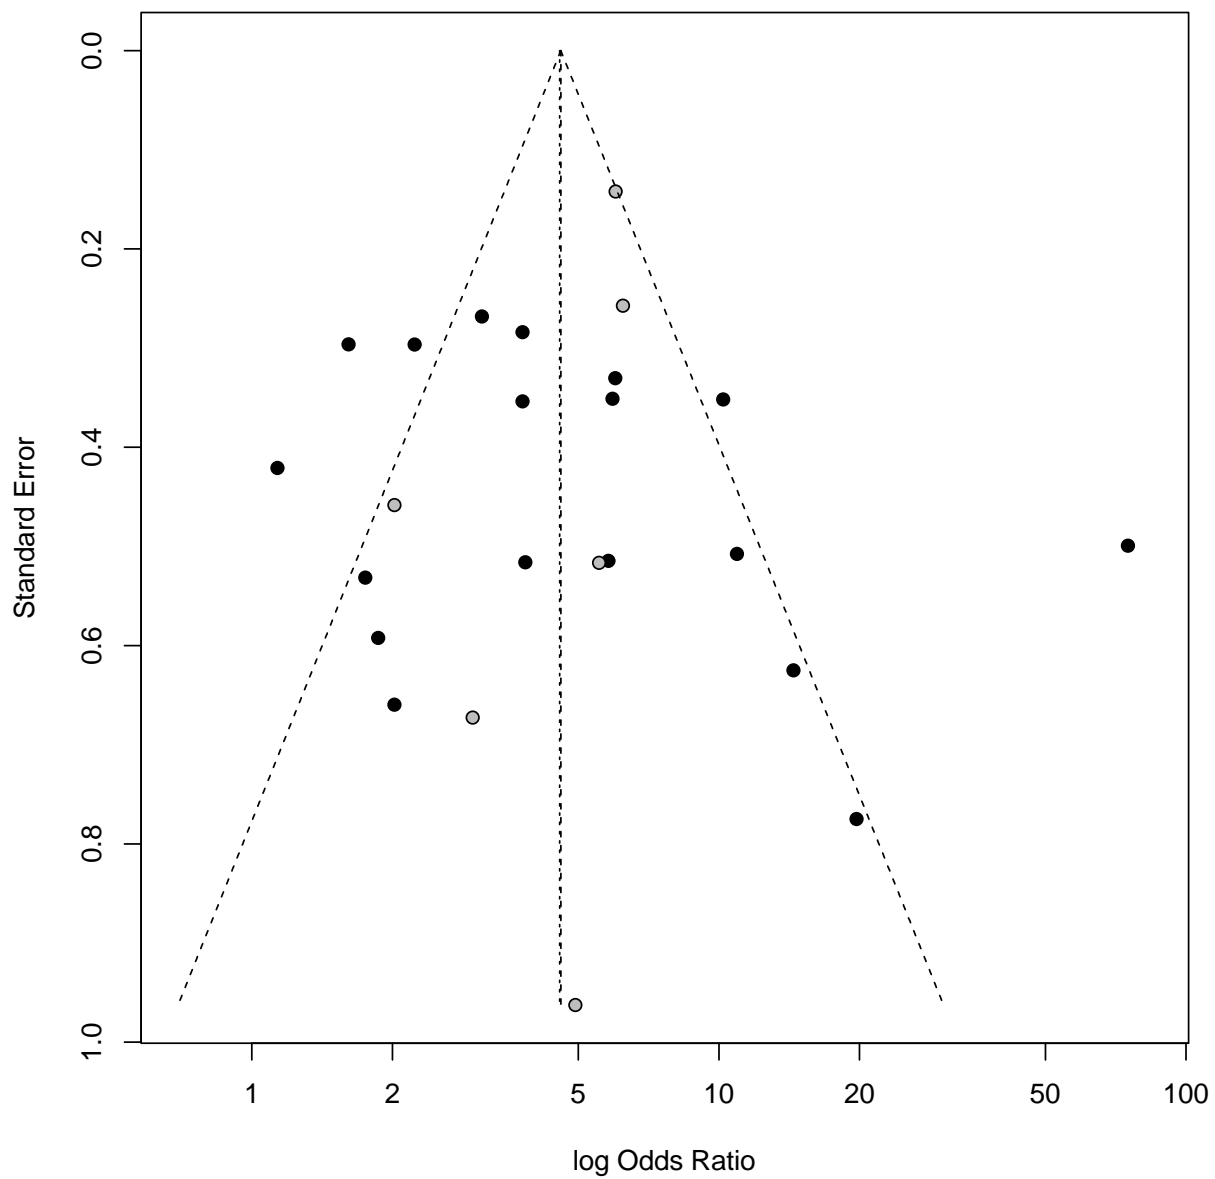

e-Figure 73

## [1] "p-value for Funnel-plot asymmetry (Eggers-test): 0.921"

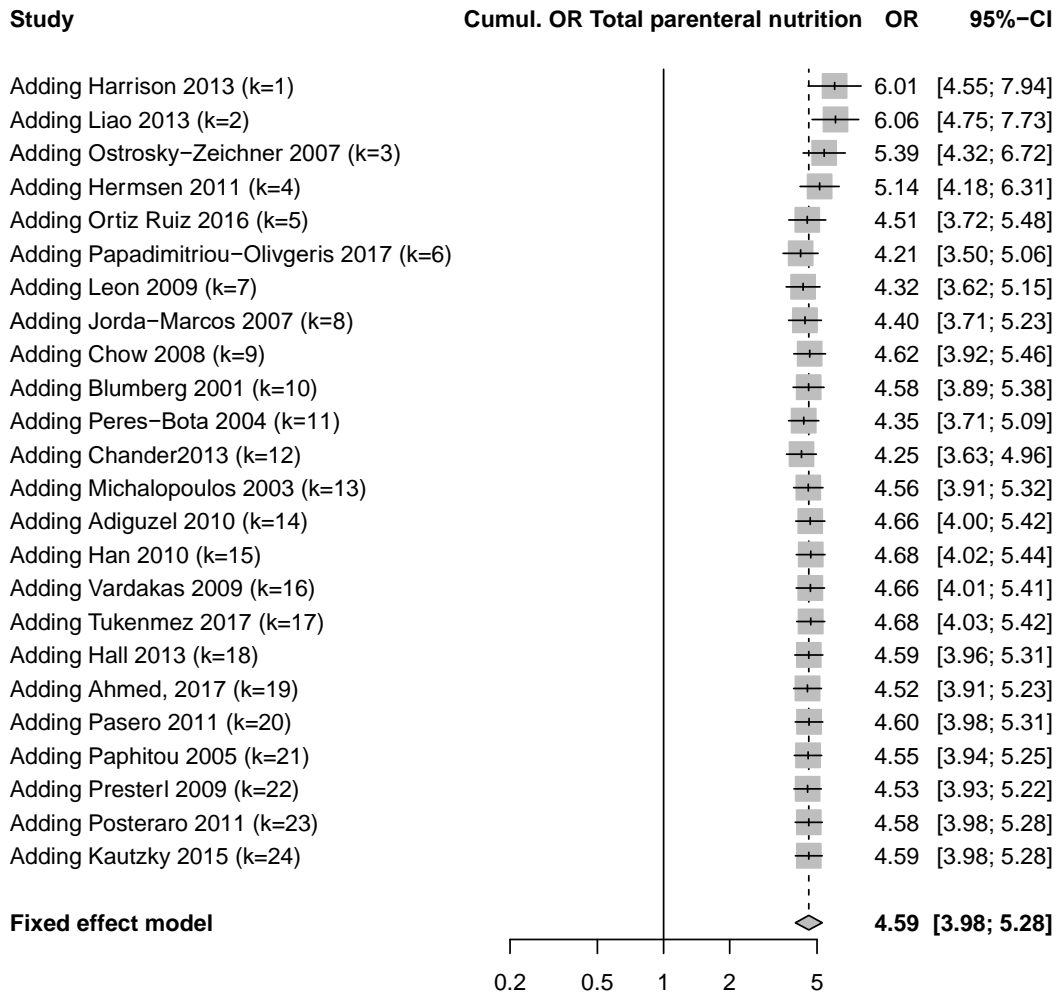

e-Figure 74

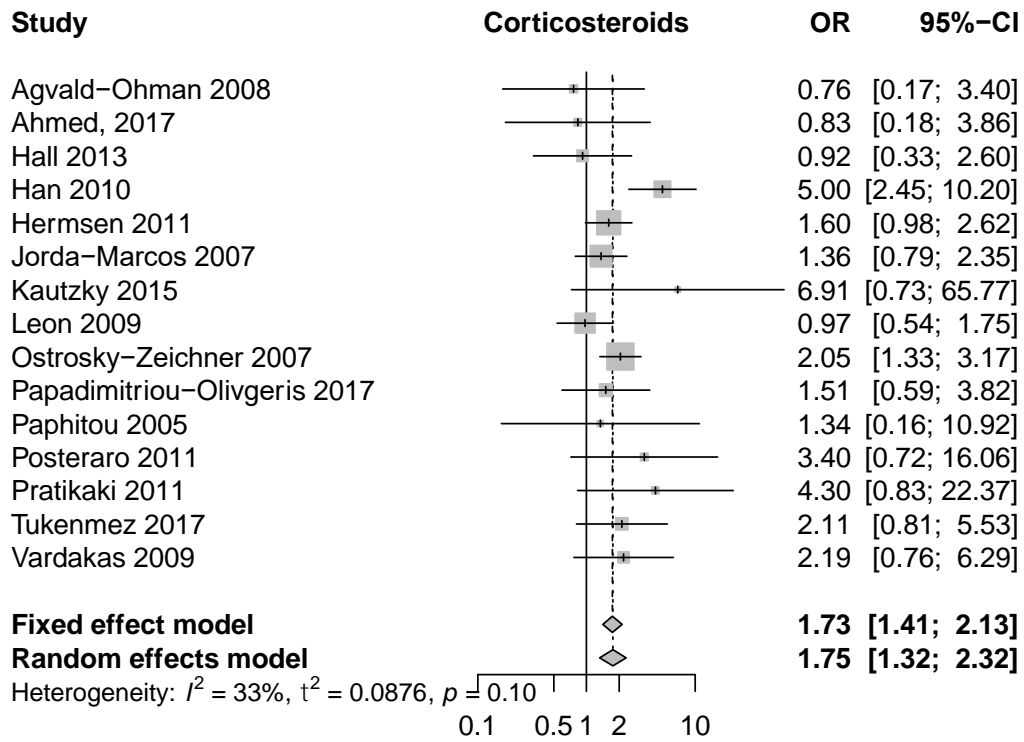

e-Figure 75

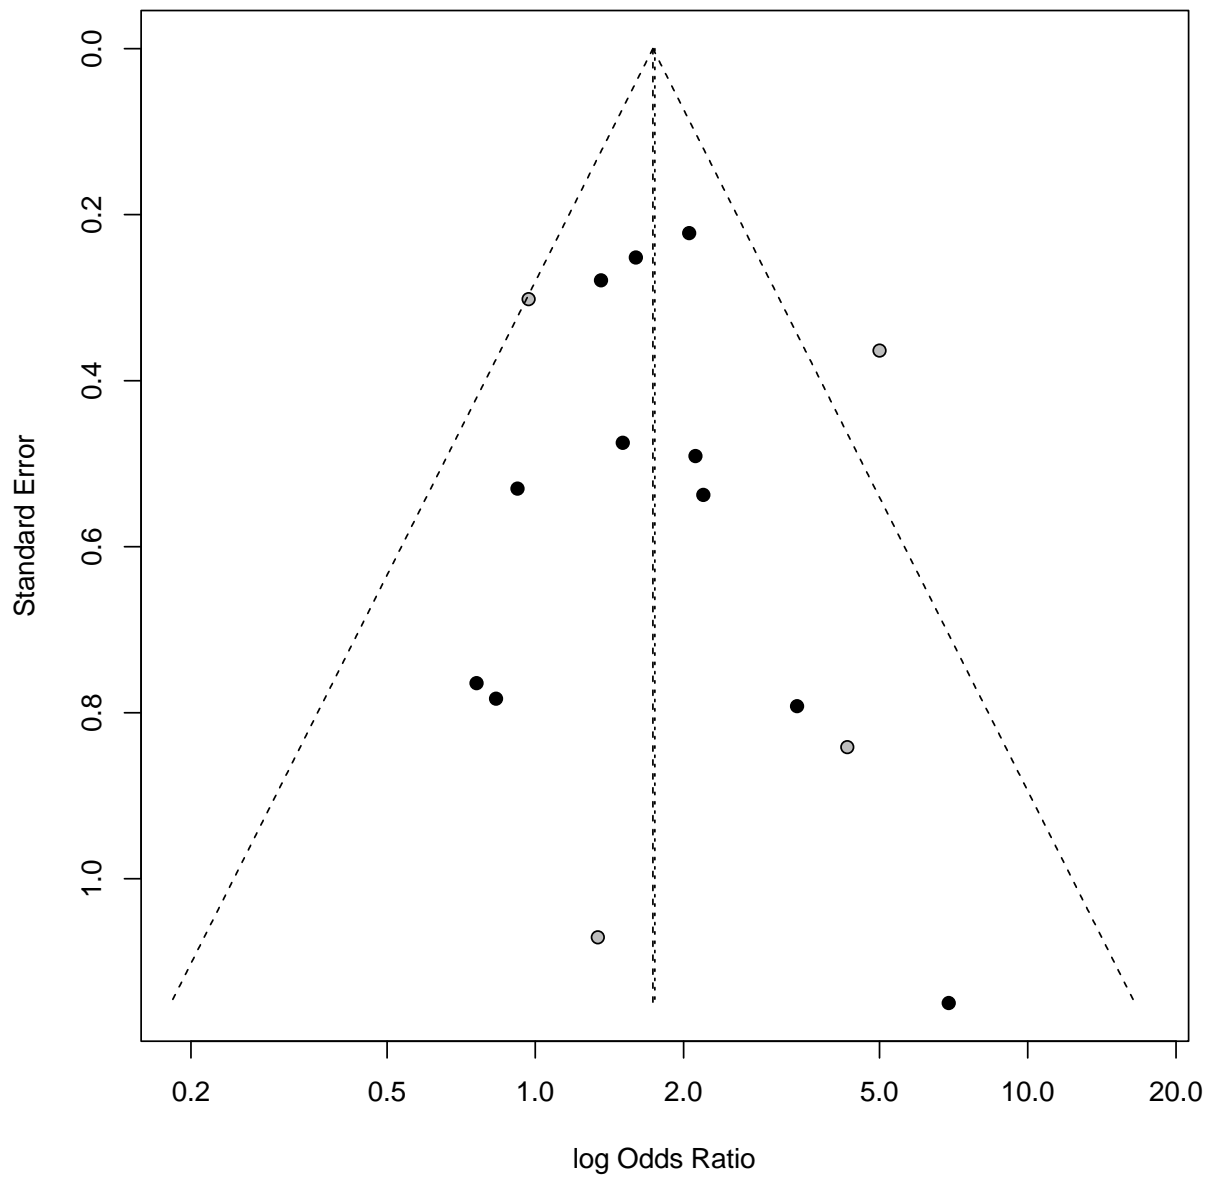

e-Figure 76

## [1] "p-value for Funnel-plot asymmetry (Eggers-test): 0.73"

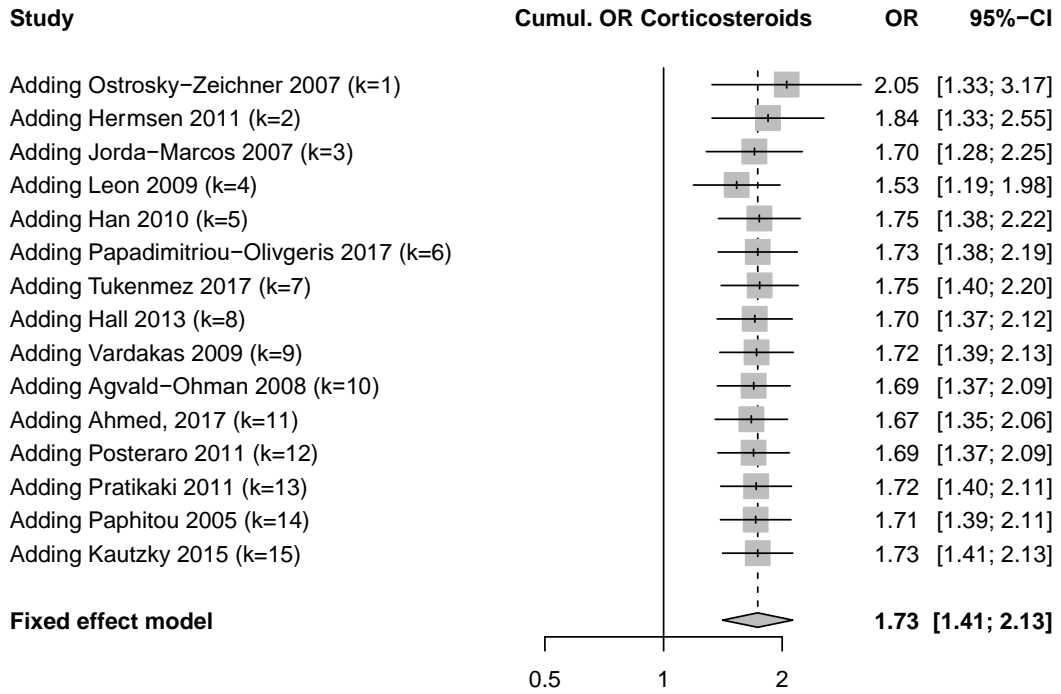

e-Figure 77

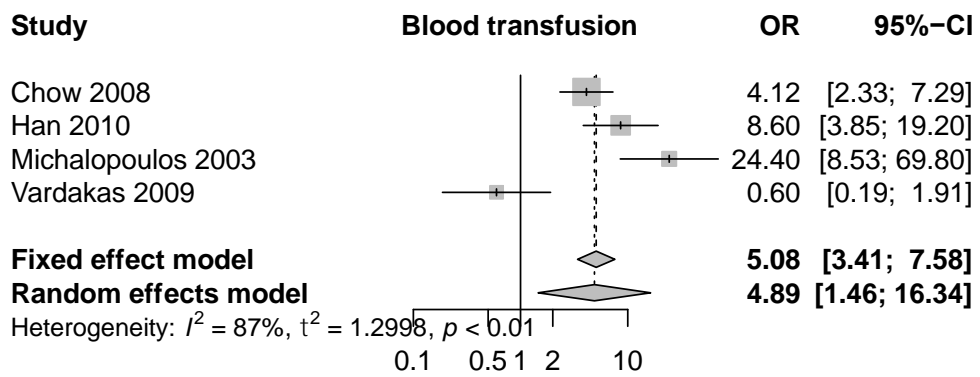

per mean RBC/day in Chow 2008

12±15 vs. 3±5 (p=0.01) RBC transfused 24-hours on admission (sic) in Manonalaki 2010

e-Figure 78

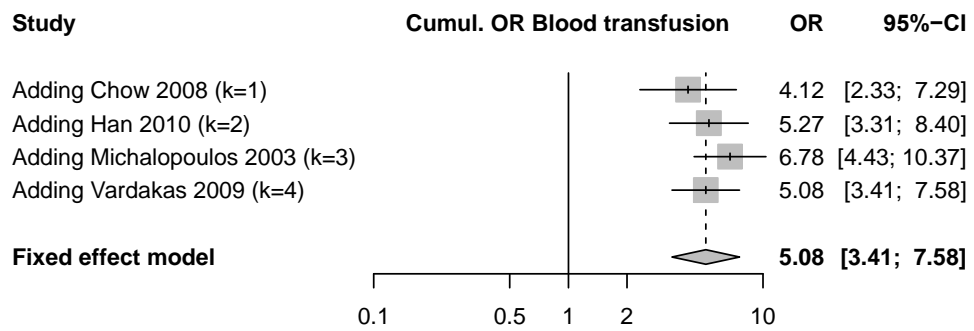

**e-Figure 79**



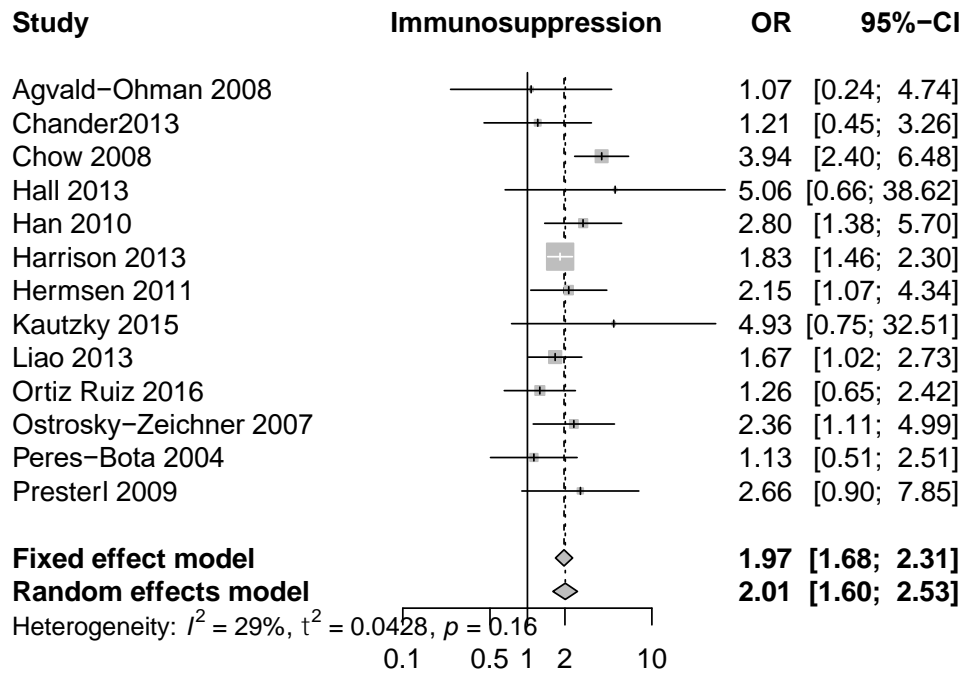

e-Figure 80

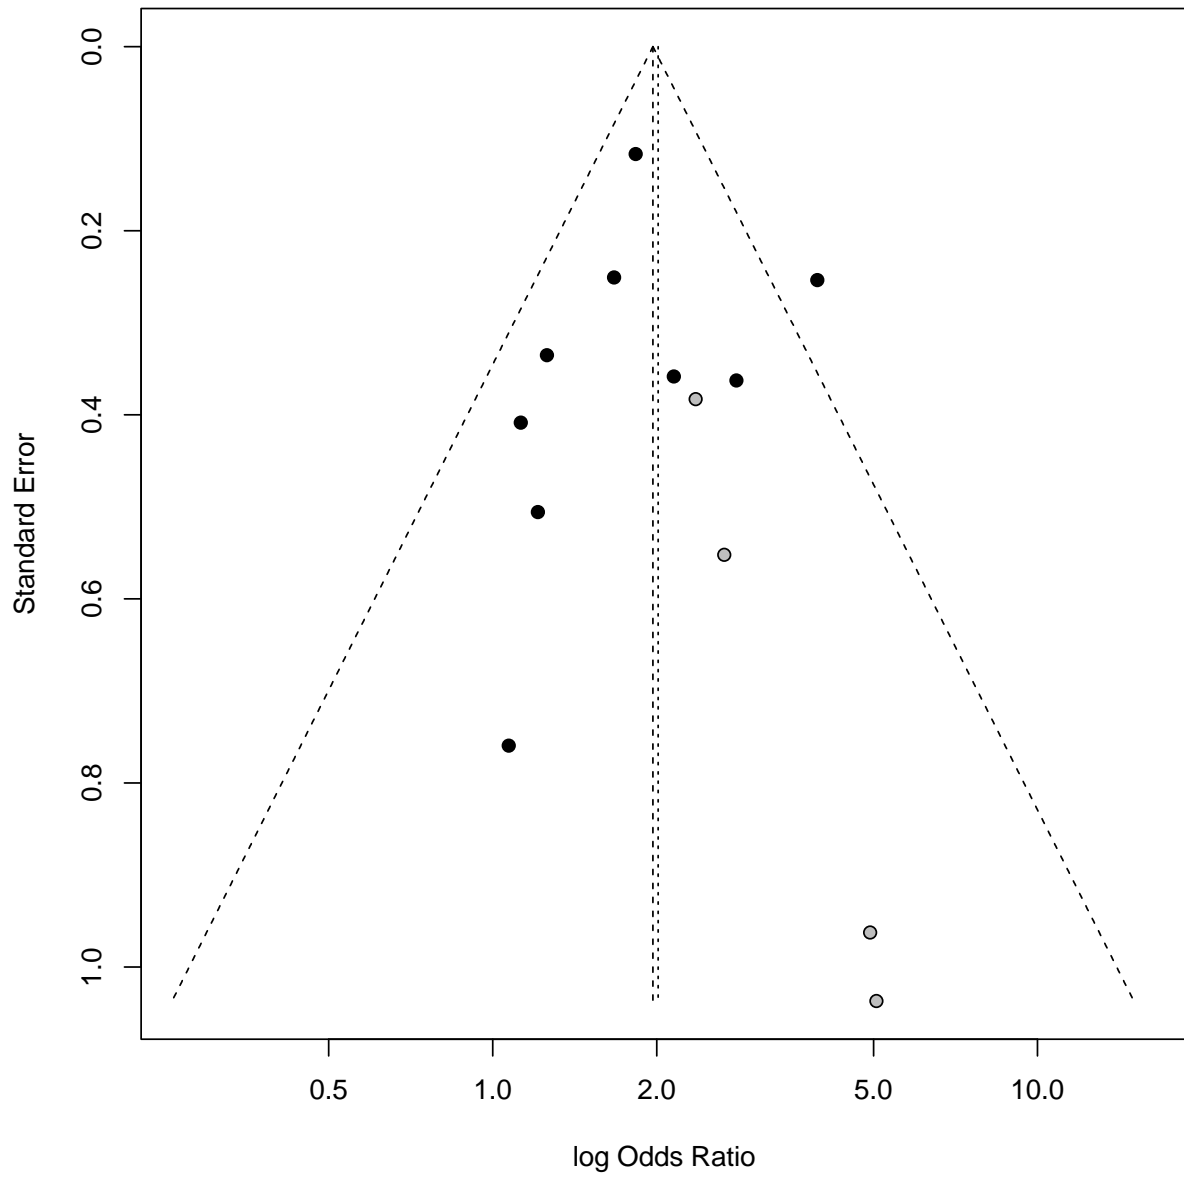

e-Figure 81

## [1] "p-value for Funnel-plot asymmetry (Eggers-test): 0.663"

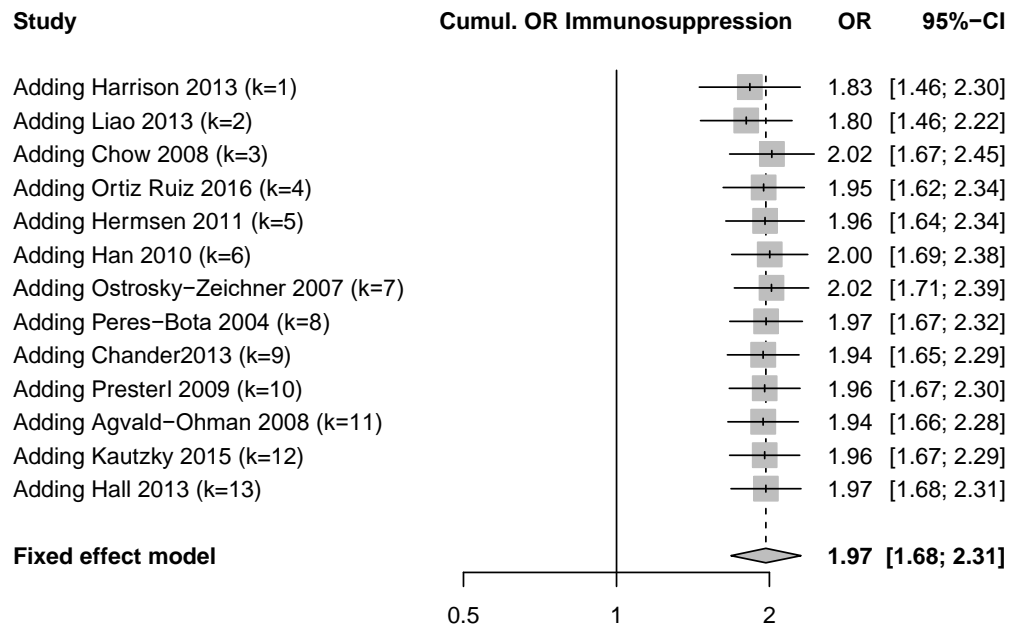

e-Figure 82

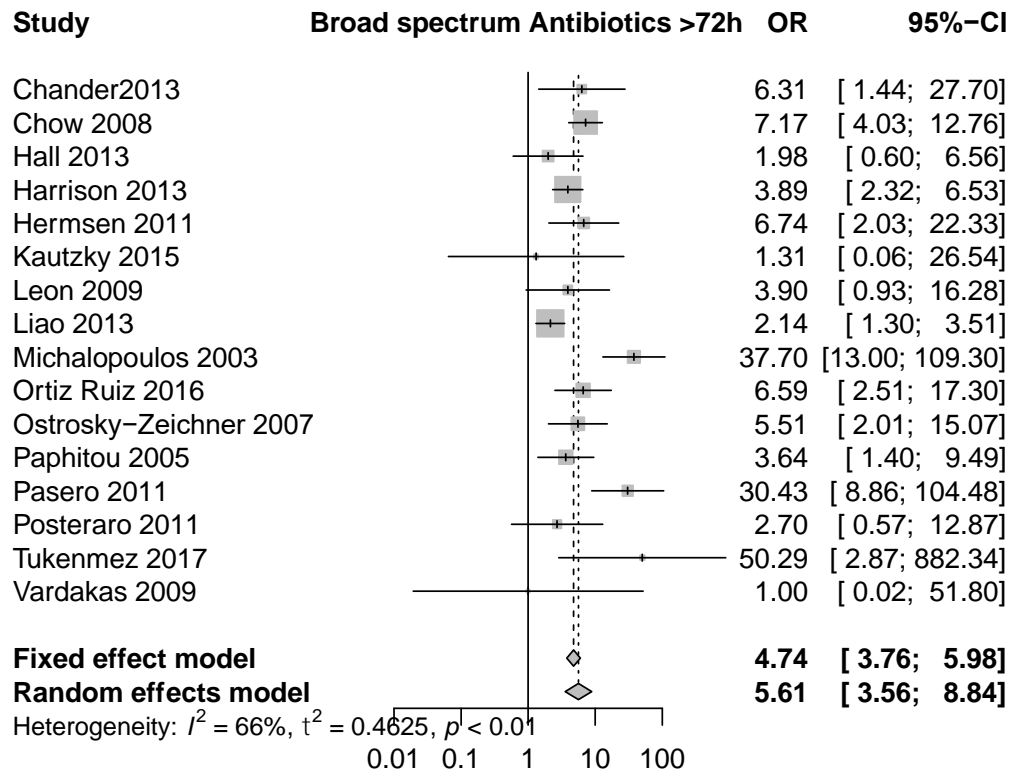

Pip/Taz & any antibiotics pooled in Chow 2008  
 unspecified antibiotics in Hall 2013, Harrison 2013 & Kautzky 2015  
 broad spectrum antibiotics in Leon 2009, Liao 2013, Ortiz Ruiz 2016, Ostrosky-Zeichner 2007,  
 Posteraro 2011 & Tukenmenez 2017  
 day 1-3 taken from Ostrosky-Zeichner 2007  
 ≥4days in Liao 2013  
 ≥2 antibiotics >72 h in Michalopoulos 2003  
 >2 antibiotics >72 h in Pasero 2011  
**e-Figure 83** all patients in Vardakas 2009

3.9±2.5 vs. 2.3±1.3 (p=0.005) antibiotics until positive culture for fungus in Manonalaki 2010

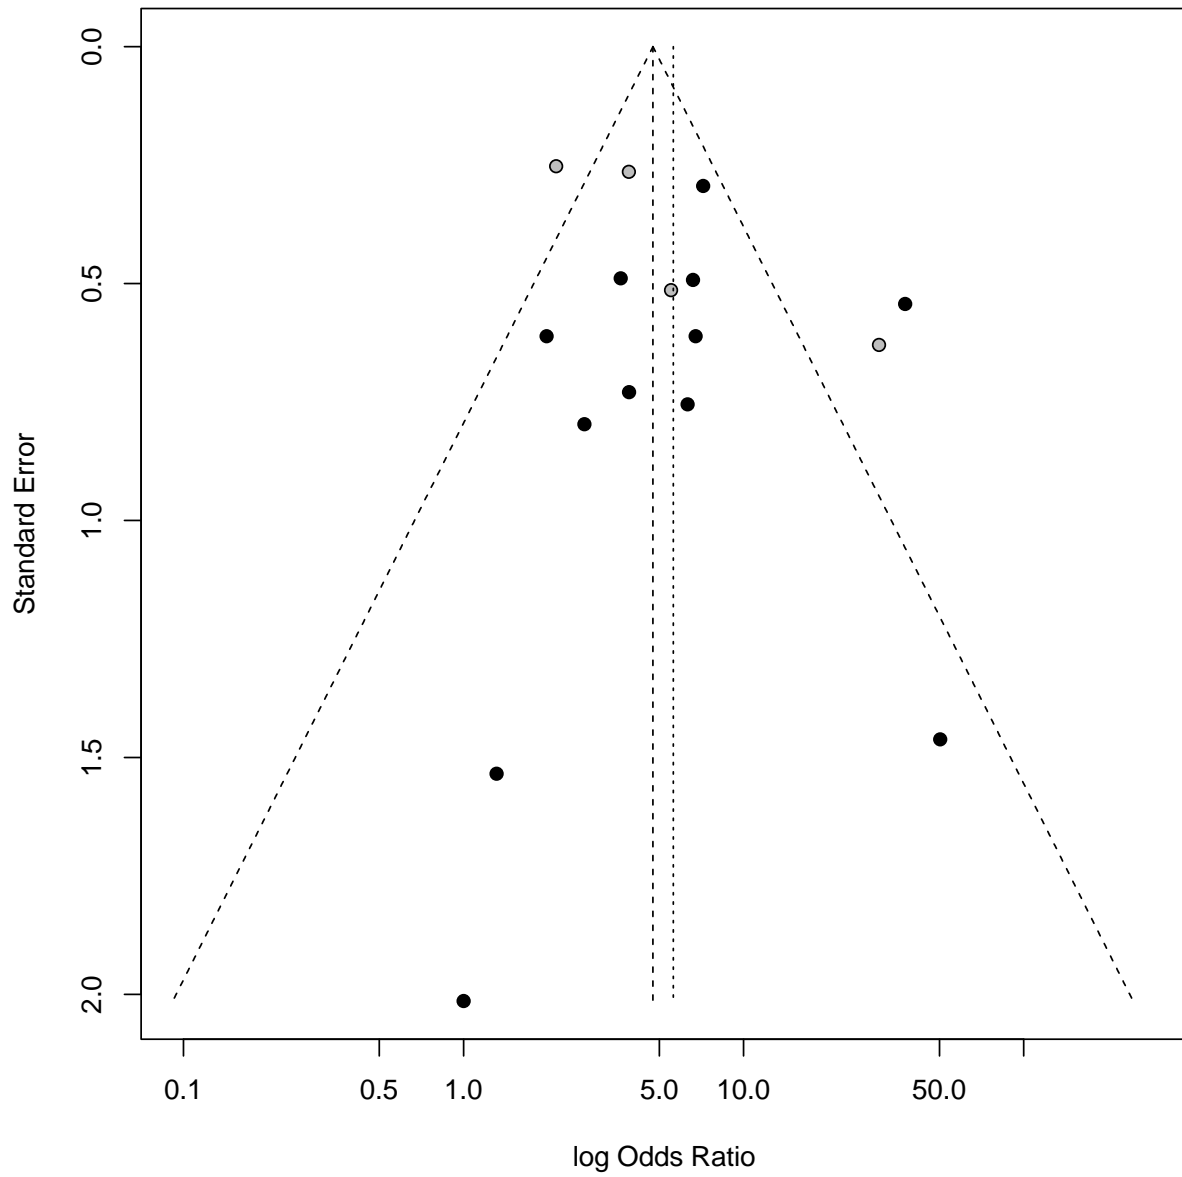

e-Figure 84

## [1] "p-value for Funnel-plot asymmetry (Eggers-test): 0.338"

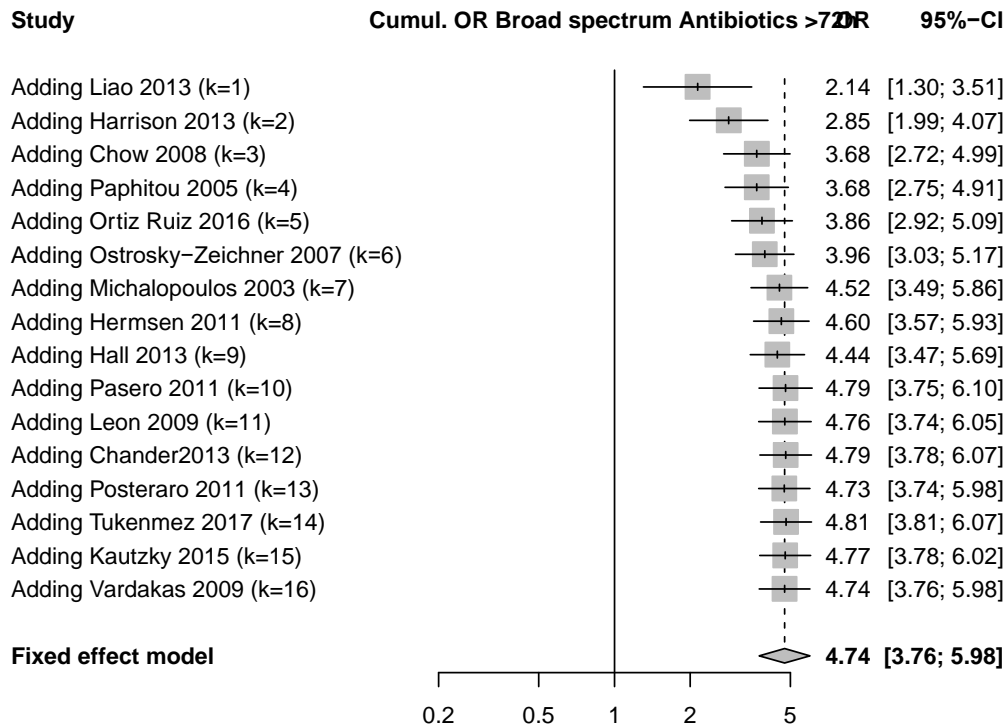

e-Figure 85

## Sensitivity Analysis

### Cohort studies only

Plot show analysis with and without ICU length of stay as risk factor for **cohort studies only** (n = 24).

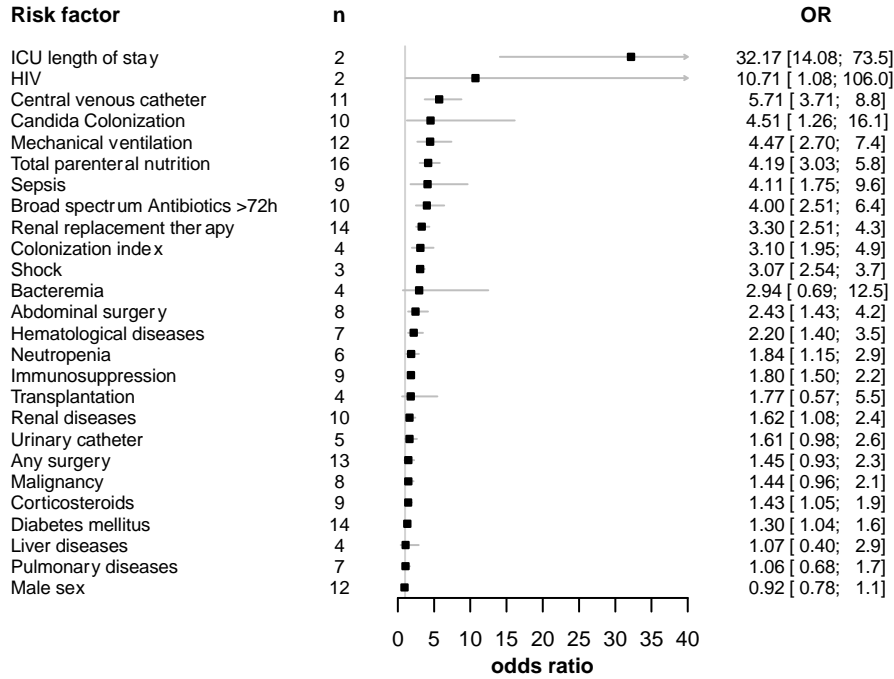

e-Figure 86: n: number of studies assessing this risk factor; or: odds ratio with 95% confidence intervals

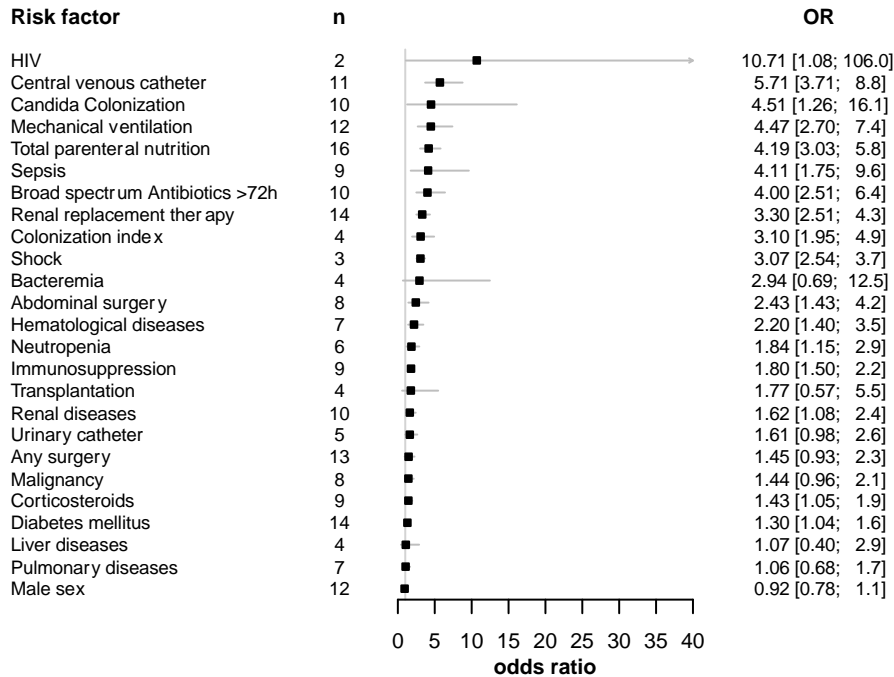

e-Figure 87: n: number of studies assessing this risk factor; or: odds ratio with 95% confidence intervals

Studies with acceptable quality only

Plot show analysis with and without ICU length of stay as risk factor with a **quality index of at least 6** (n = 23).

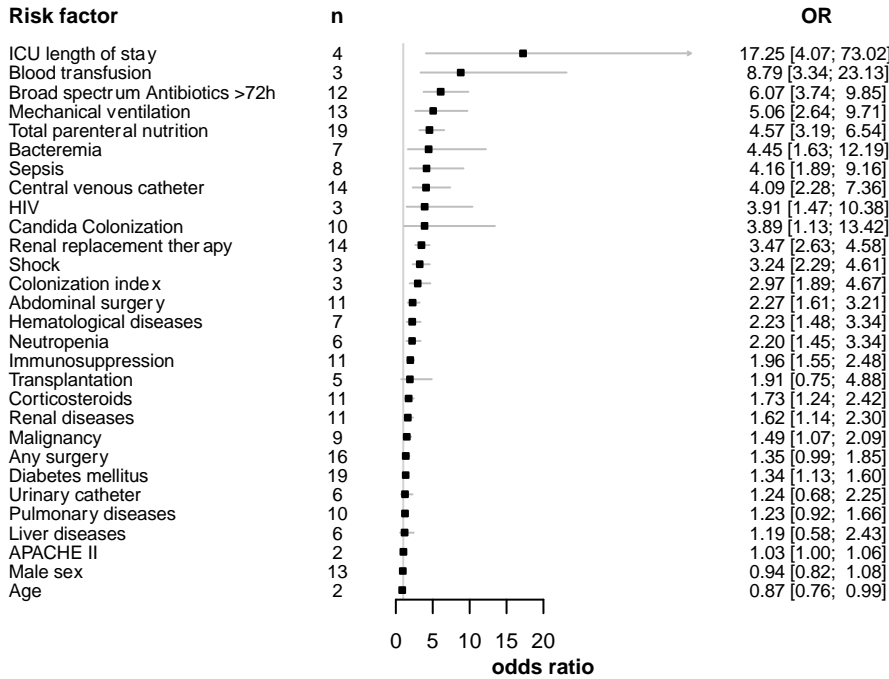

e-Figure 88: n: number of studies assessing this risk factor; or: odds ratio with 95% confidence intervals

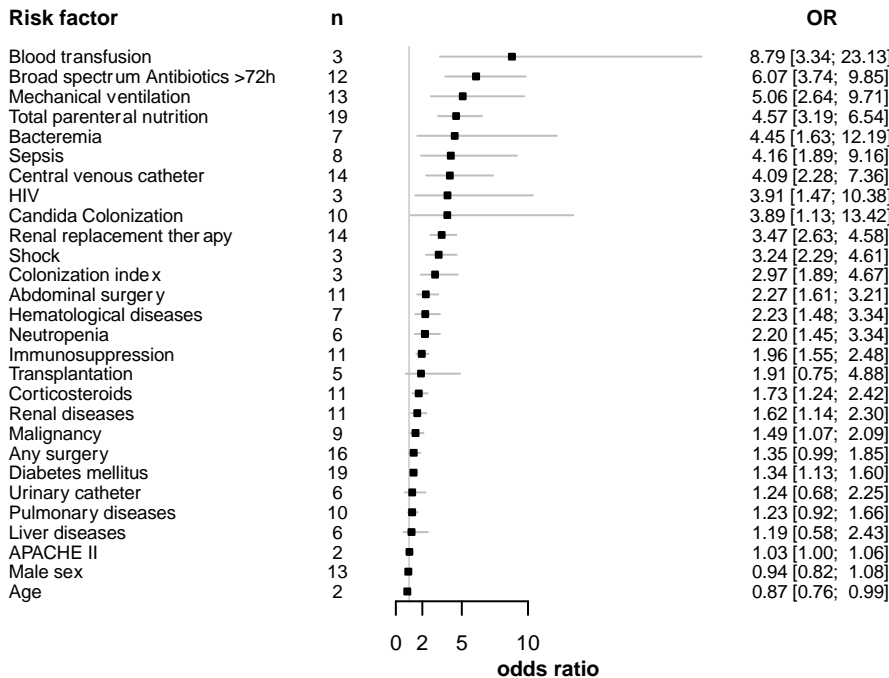

e-Figure 89: n: number of studies assessing this risk factor; or: odds ratio with 95% confidence intervals



*Studies with high quality only*

Plot show analysis with a **quality index of at least 9** (n = 5).

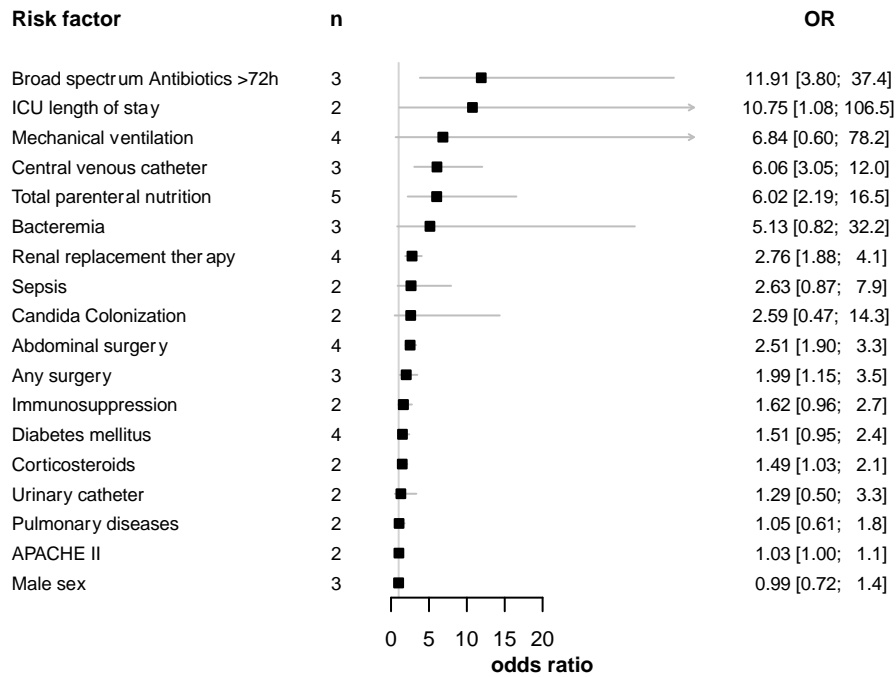

**e-Figure 90:** n: number of studies assessing this risk factor; or: odds ratio with 95% confidence intervals

## Results adjusted data

Data were obtained from the publication as described above in the unadjusted analysis. Standard error of OR was calculated and metaanalysis was performed likewise.

### Assessment of bias

This metaanalysis includes 17 studies: 11 cohort and 6 case control studies. Overall quality was moderate with a median of 8 where 4 studies were of low, 9 studies of acceptable and 4 studies of high quality.

**e-Table 5: Bias assessment for each study**

| Study                        | Design       | Quality indicator |
|------------------------------|--------------|-------------------|
| Agvald-Ohman 2008            | cohort       | 6                 |
| Blumberg 2001                | cohort       | 9                 |
| Burghi 2011*                 | cohort       | 2                 |
| Chow 2008                    | case control | 8                 |
| Hall 2013                    | cohort       | 5                 |
| Han 2010                     | case control | 7                 |
| Harrison 2013                | cohort       | 8                 |
| Jorda-Marcos 2007            | cohort       | 9                 |
| Kontopoulou 2014*            | cohort       | 1                 |
| Liao 2013                    | cohort       | 8                 |
| Manolakaki 2010              | cohort       | 5                 |
| Michalopoulos 2003           | case control | 9                 |
| Ortiz Ruiz 2016              | case control | 9                 |
| Papadimitriou-Olivgeris 2017 | case control | 8                 |
| Paphitou 2005                | cohort       | 6                 |
| Pasero 2011                  | cohort       | 8                 |
| Pratikaki 2011               | case control | 6                 |

\*: study with abstract only

## Complete analysis

The following figure shows the common odds ratios (fixed effect model) of all obtained adjusted risk factors for invasive candida infection. Risk factors represented in one study only are excluded. Forest plot for all single risk factors are shown in the appendix.

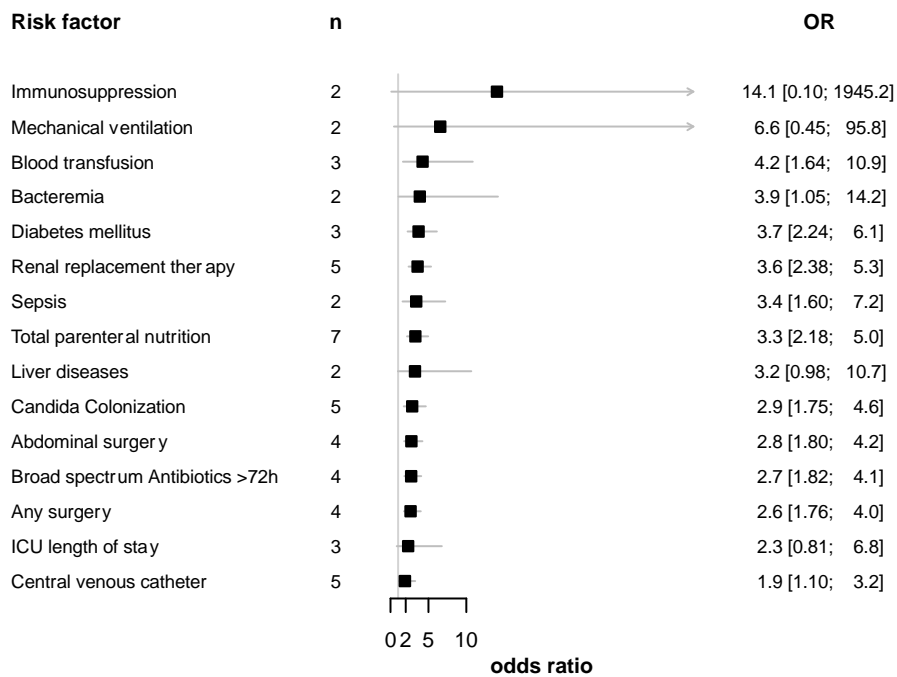

**e-Figure 91: n: number of studies assessing this risk factor; or: odds ratio with 95% confidence intervals**

### Adjusted Meta-analyses of single risk factors

Cumulative meta-analysis is only done if two studies observed the risk factor.

Funnel plot is presented if at least seven studies reported the risk factor and Egger test for Funnel plot asymmetry was not performed as no risk factor was reported by least ten studies.

Were only the final model after selection was available we report risk factors not selected into the final model in the footnotes. Were a model with all risk factors entered into modelling was available on request we used those, therefore there might be differences from the odds ratios reported in the original papers.

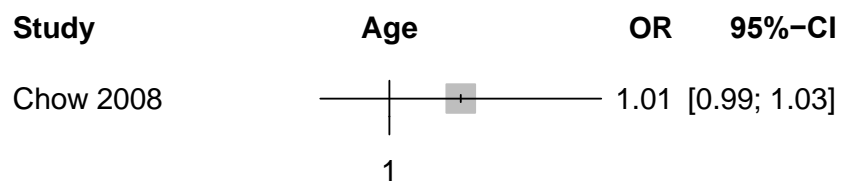

Not selected into the final model in Pratikaki 2011

**e-Figure 92**

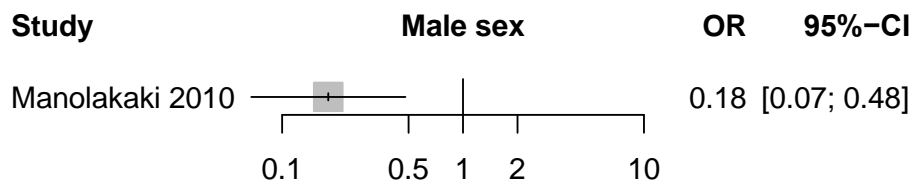

Not selected into the final model in Agvald-Ohman 2008 & Pratikaki 2011

**e-Figure 93**

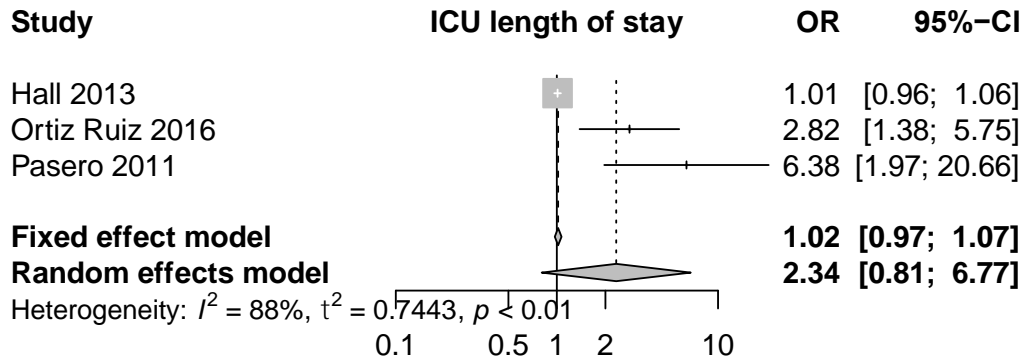

Not selected into the final model in Michalopoulos 2003

Per day of ICU LOS in Hall 2013

ICU LOS > 14 days in Ortiz Ruiz 2016

ICU LOS > 20 days in Pasero 2011

e-Figure 94

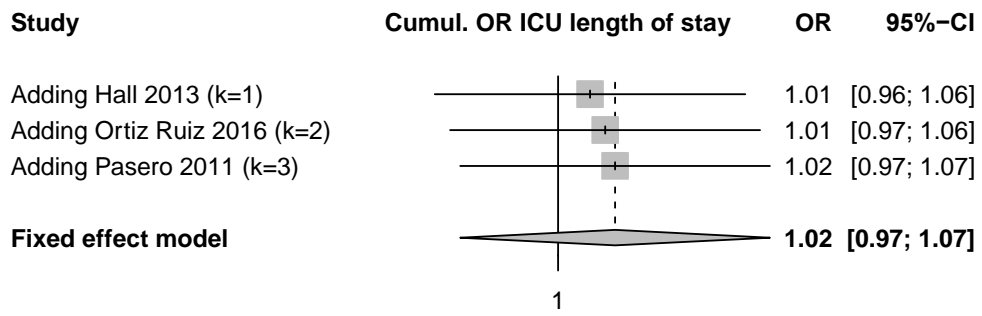

e-Figure 95



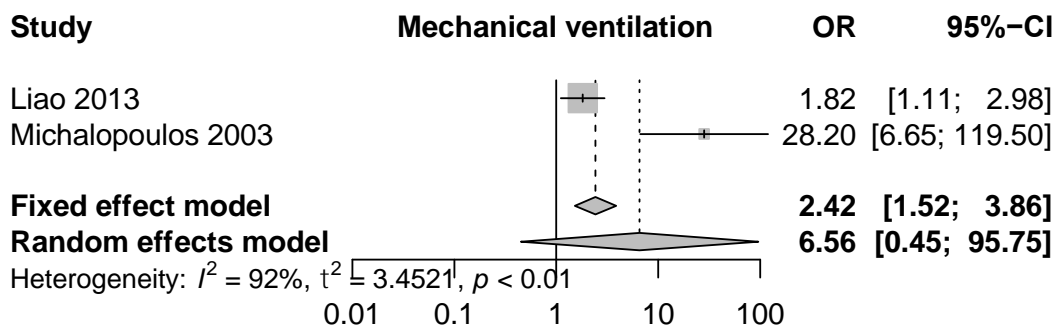

Not selected into the final model in Pasero 2011 & Pratikaki 2011

Mechanical ventilation >2 days in Liao 2013

Mechanical ventilation  $\geq 10$  days in Michalopoulos 2003

e-Figure 96

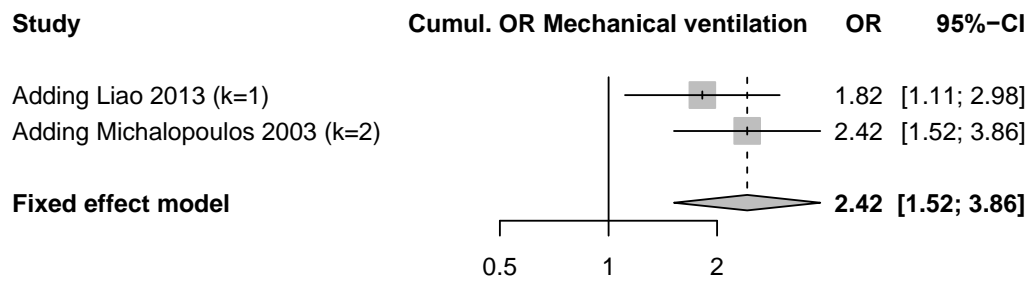

**e-Figure 97**

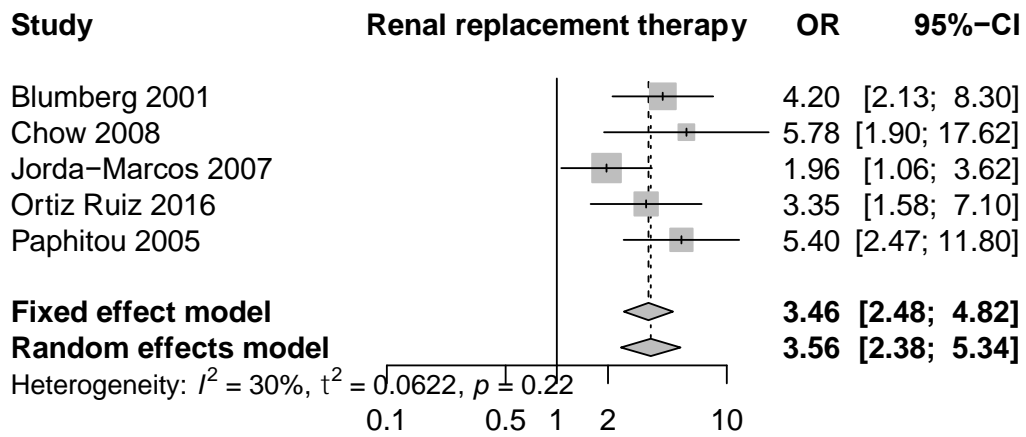

Not selected into the final model in Harrison 2013 & Pasero 2011

Hemodialysis duration / days at risk in Chow 2008  
 New onset RRT day 1-3 in Papithou 2005

e-Figure 98

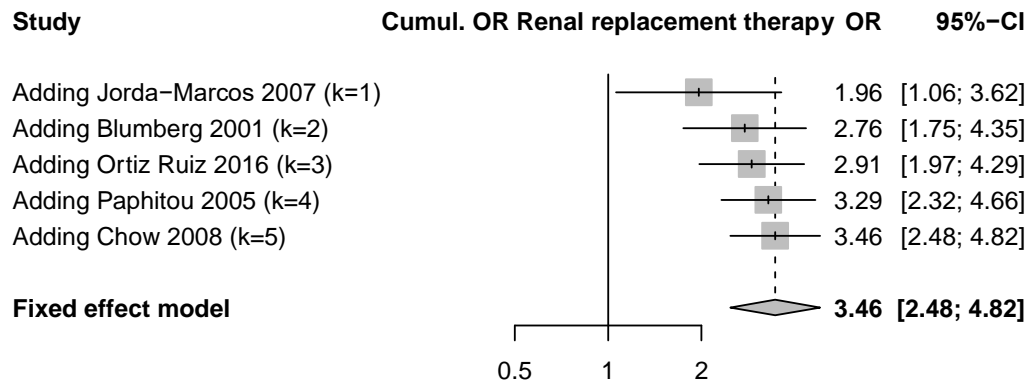

e-Figure 99

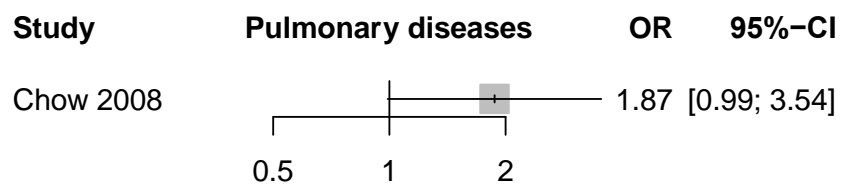

e-Figure 100

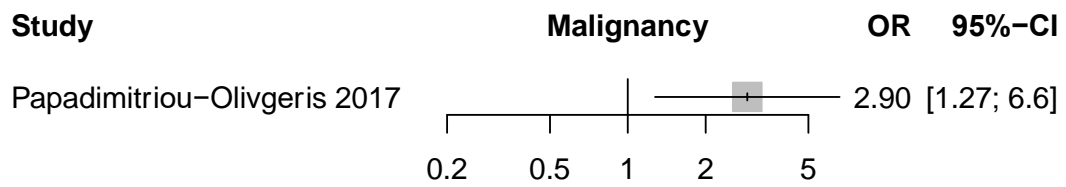

Not selected into the final model in Liao 2013 that analyzed hematological disease separately

Papadimitriou-Olivgeris 2017 assessed solid tumor or hematologic disease together

**e-Figure 101**

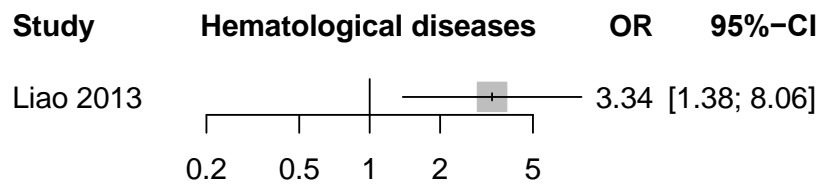

e-Figure 102

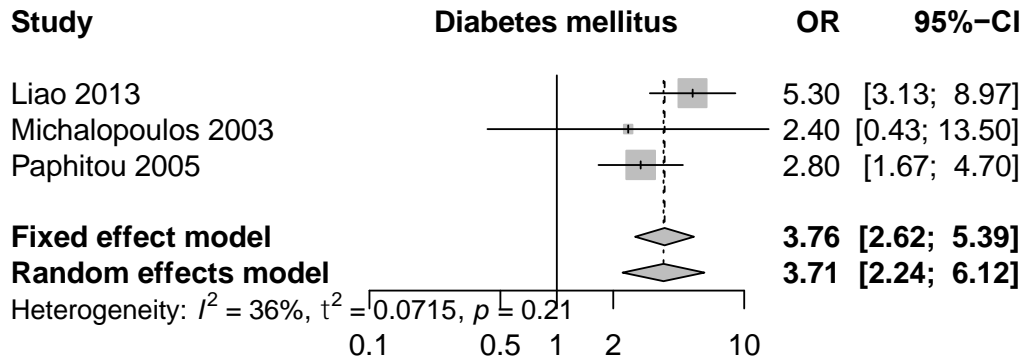

Not selected into the final model in Agvald-Ohman 2008, Pasero 2011 & Pratikaki 2011

e-Figure 103



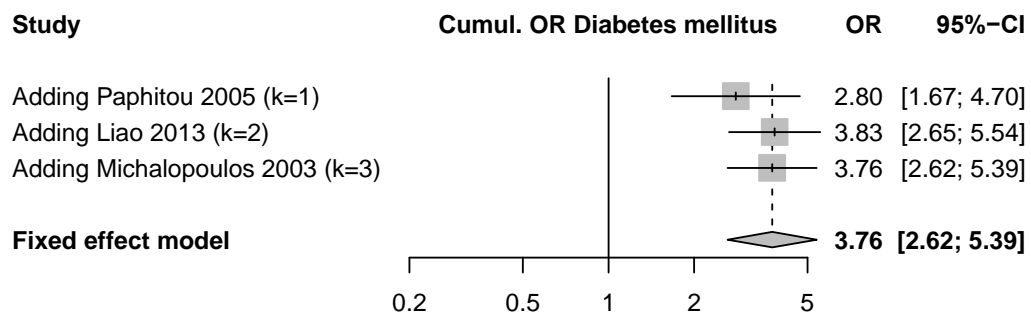

e-Figure 104

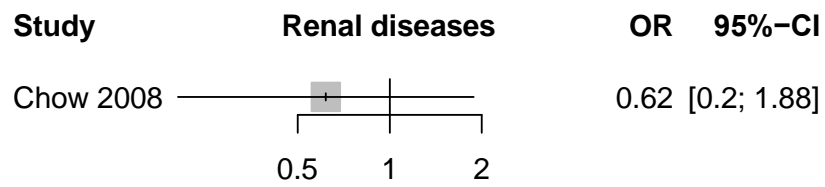

Not selected into the final model in Agvald-Ohman 2008 & Pasero 2011

Not selected into the final model in Michalopoulos 2003 & Pratikaki 2011 using the term acute renal failure

**e-Figure 105**

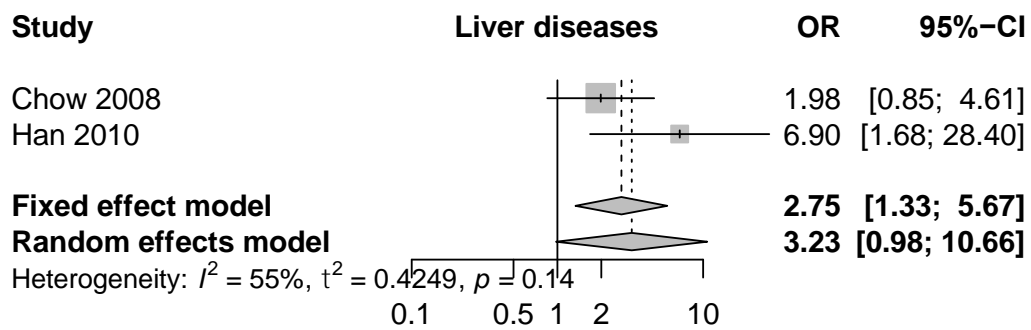

Only cirrhosis in Chowl 2009  
 Hepatic failure on admission in Han 2010

e-Figure 106

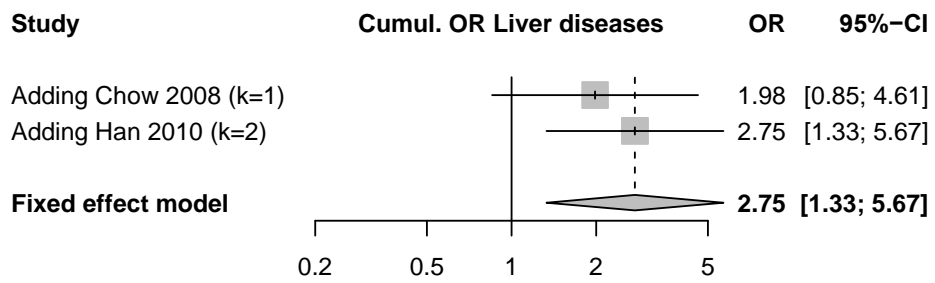

e-Figure 107

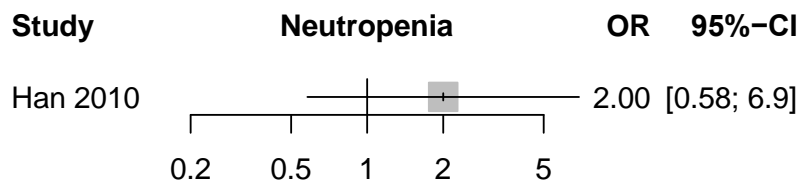

**e-Figure 108**

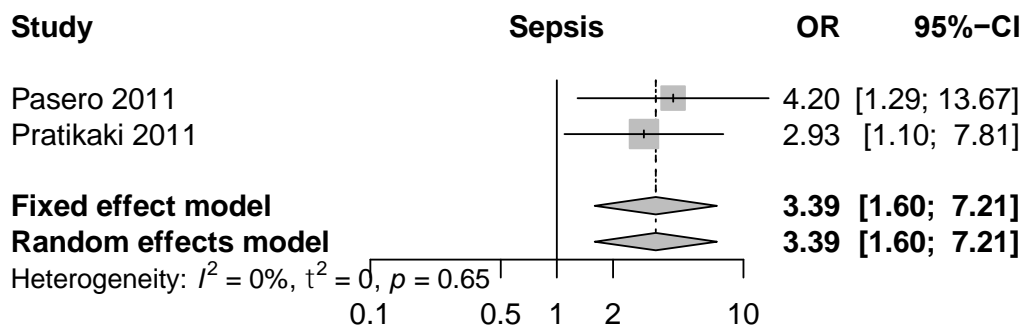

Not selected into the final model in Ortiz Ruiz 2016

e-Figure 109

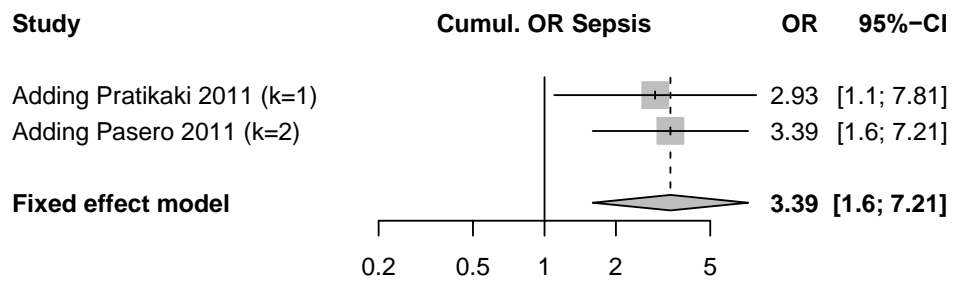

Not selected into the final model in Pasero 2011 & Pratikaki 2011

**e-Figure 110**

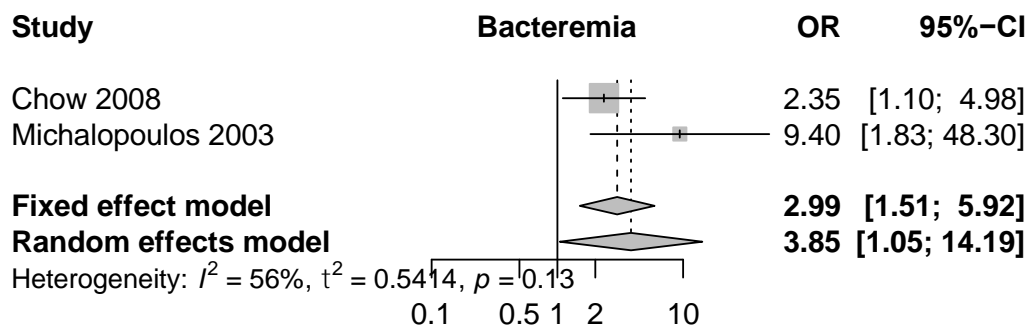

e-Figure 111



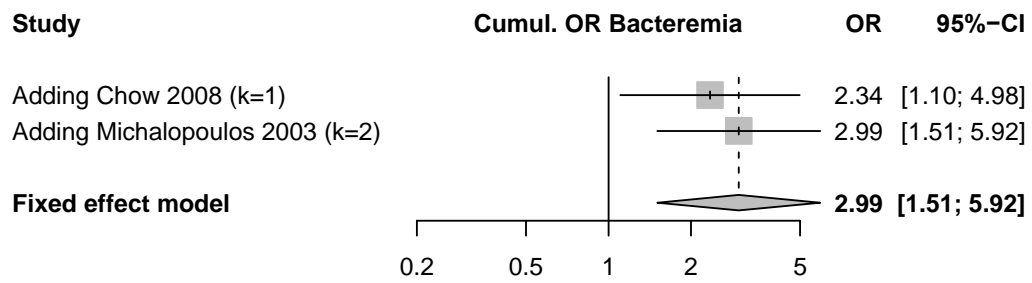

e-Figure 112

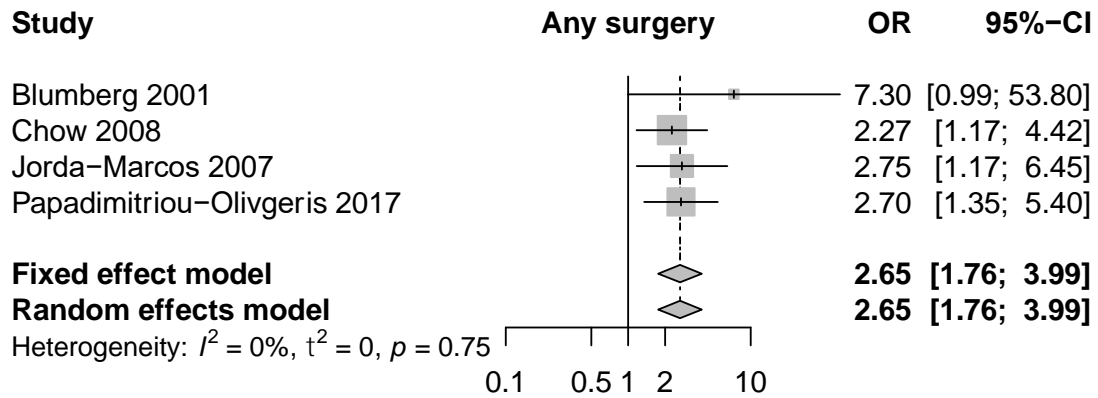

Not selected into the final model in Burghi 2011\* & Harrison 2013

Elective surgery in Jorda-Marcos 2007

Prior emergency surgery in Papadimitiou-Olivgeris 2017

e-Figure 113

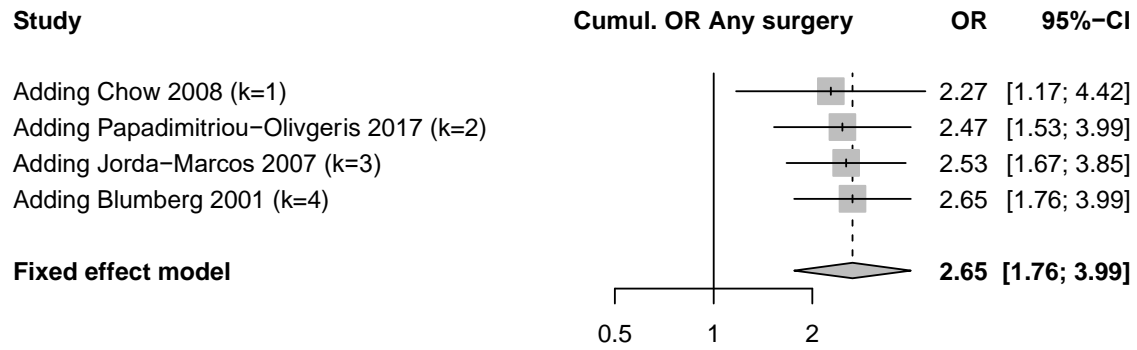

e-Figure 114

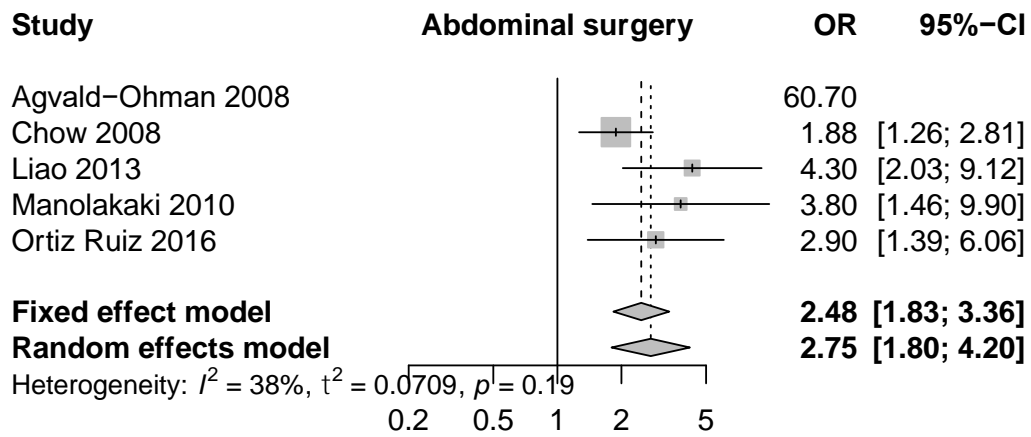

Agvald-Ohman 2008 reports an 95%-CI of 7.3 – infinity that could not be handled by the software

e-Figure 115

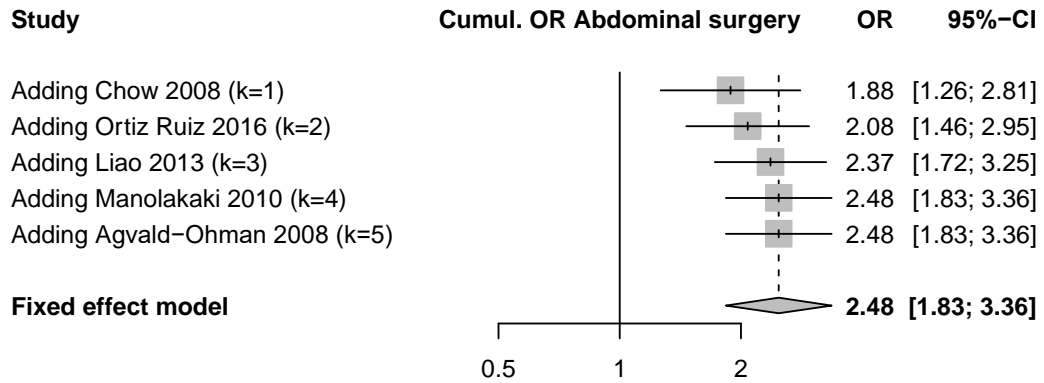

e-Figure 116

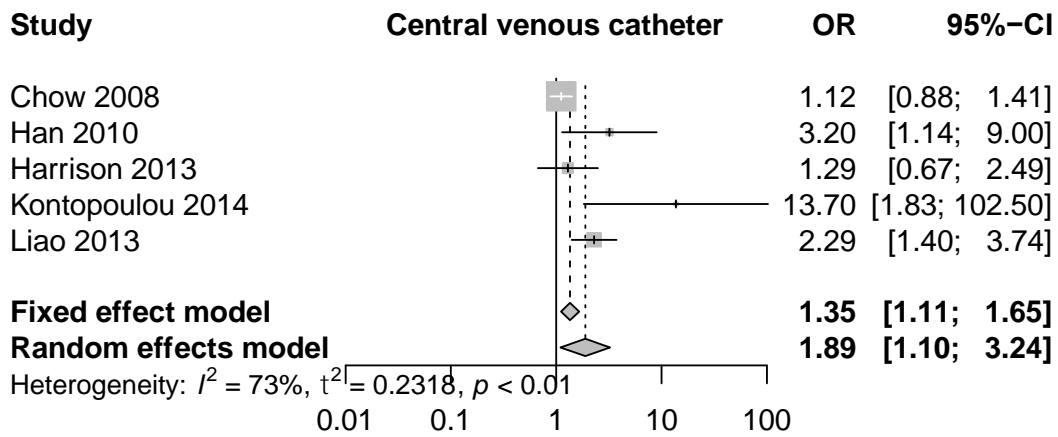

Not selected into the final model in Burghi 2011\*

Not selected into the final model in Michalopoulos 2003, assessing CVC >72h

Chow 2008 calculated the OR per CVC day in their analysis

e-Figure 117

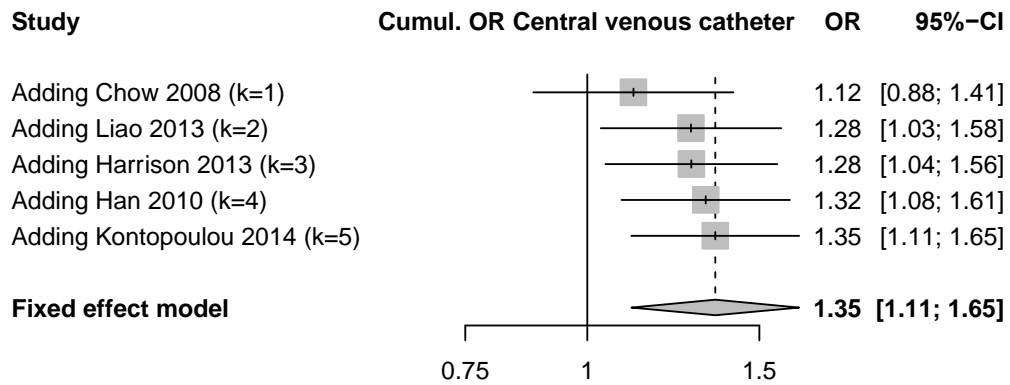

e-Figure 118

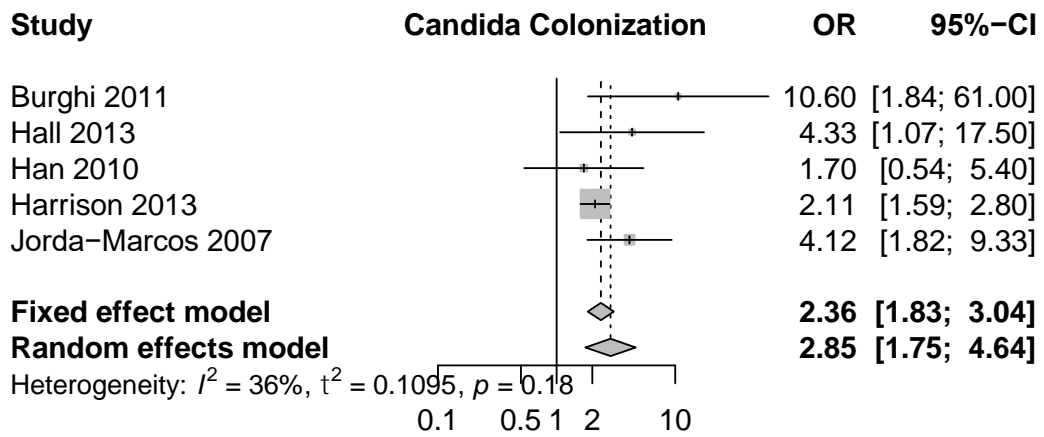

Colonization by at least two sites assessed by Burghi 2011\*

e-Figure 119



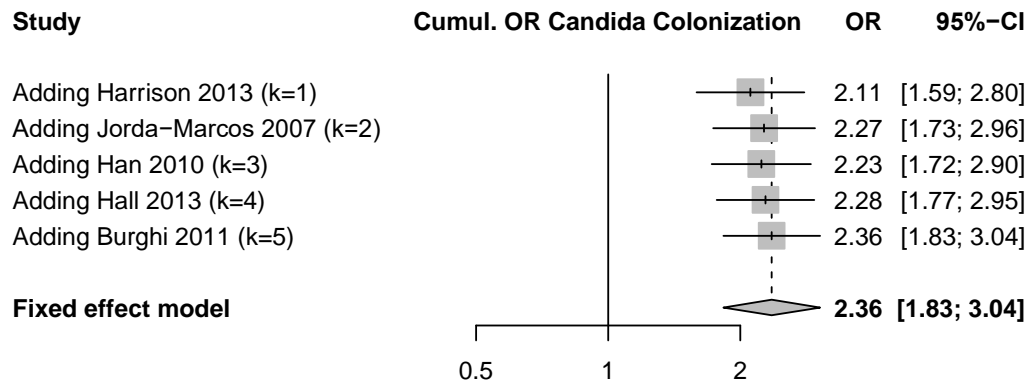

e-Figure 120

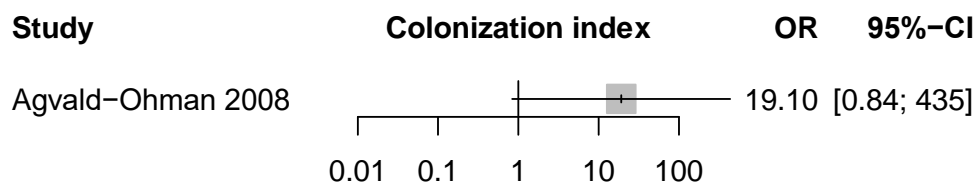

Colonization index >0.5

e-Figure 121

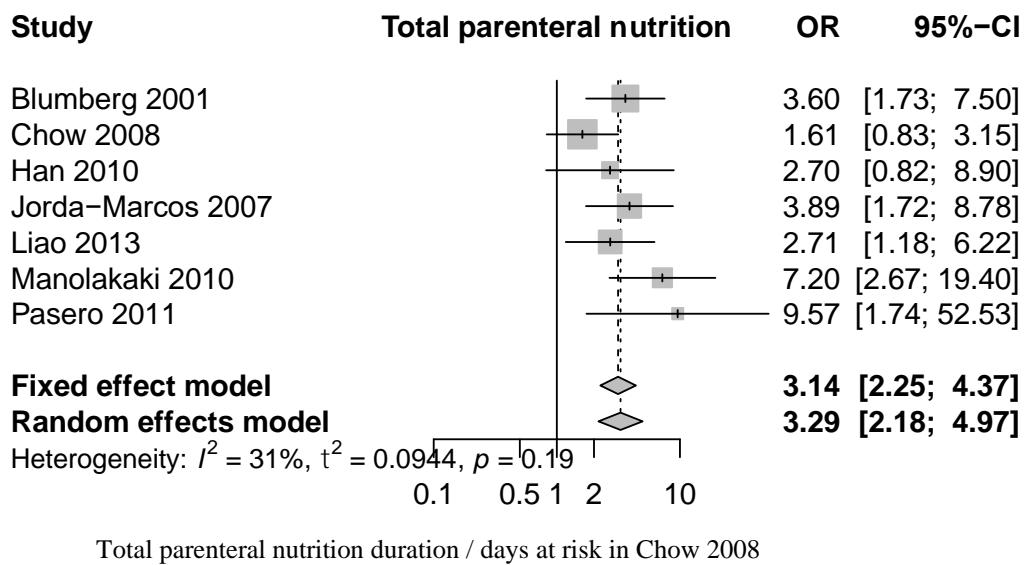

e-Figure 122

### Funnel-Plot Total parenteral nutrition

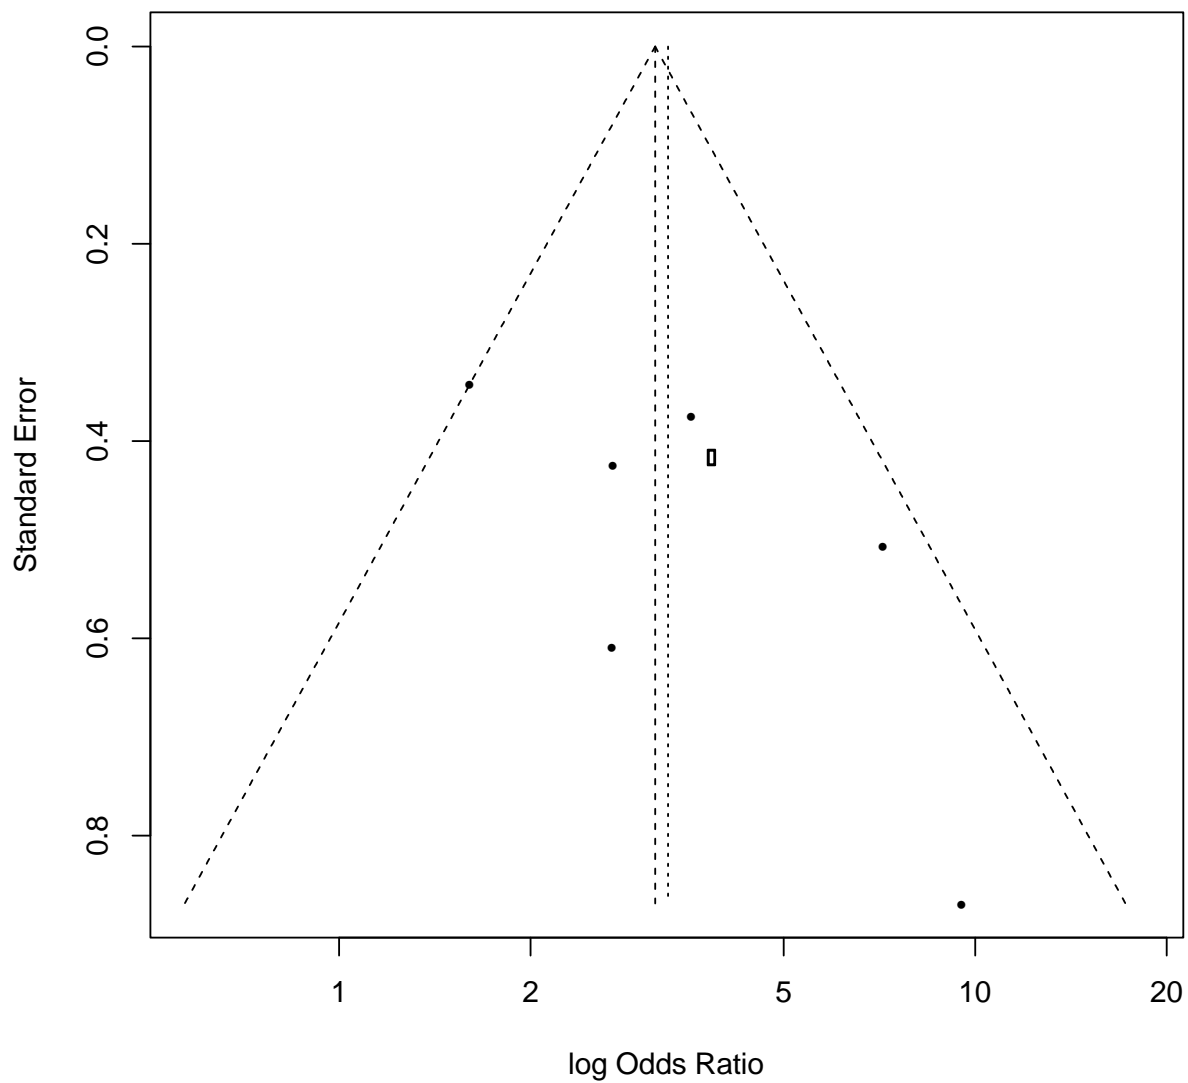

e-Figure 123

## [1] "Eggers test not available for less than 10 studies"

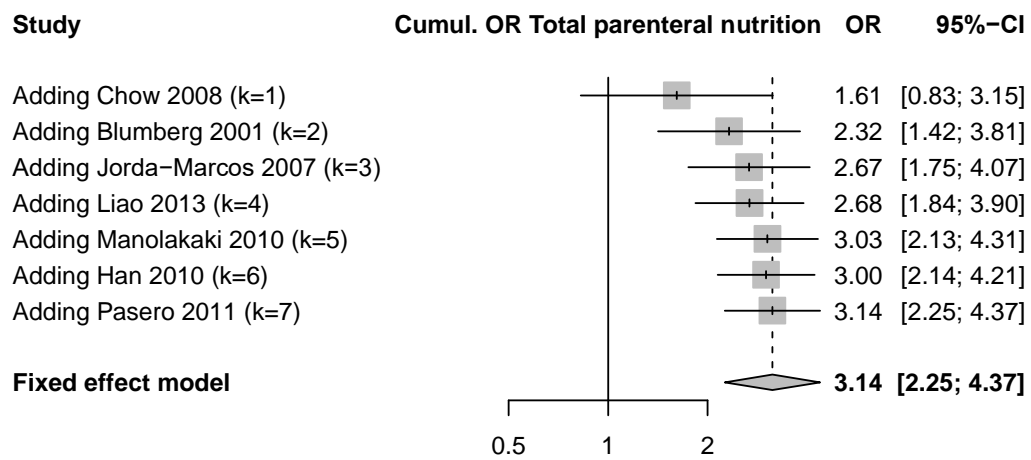

e-Figure 124

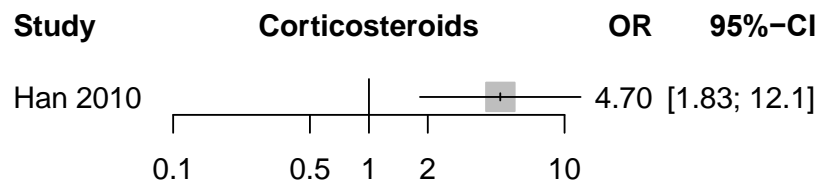

Not selected into the final model in Agvald-Ohman 2008, Burghi 2011\* & Paratikaki 20011

e-Figure 125

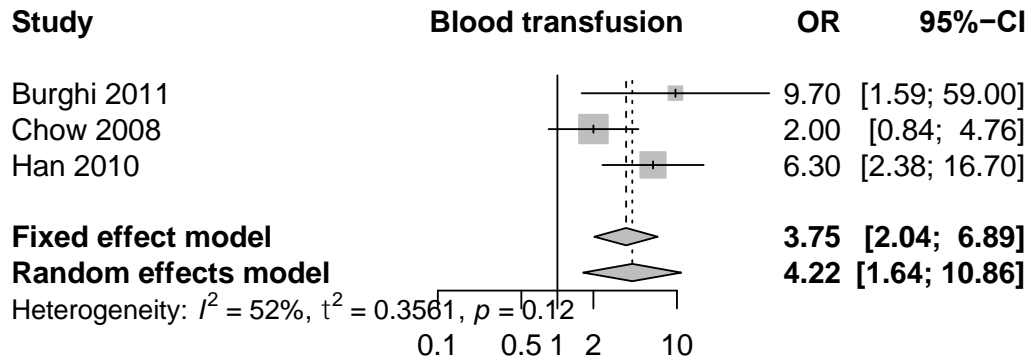

≥ 4 RBCs in Burghi 2011\*  
 Mean RBCs/day in Chow 2008

e-Figure 126

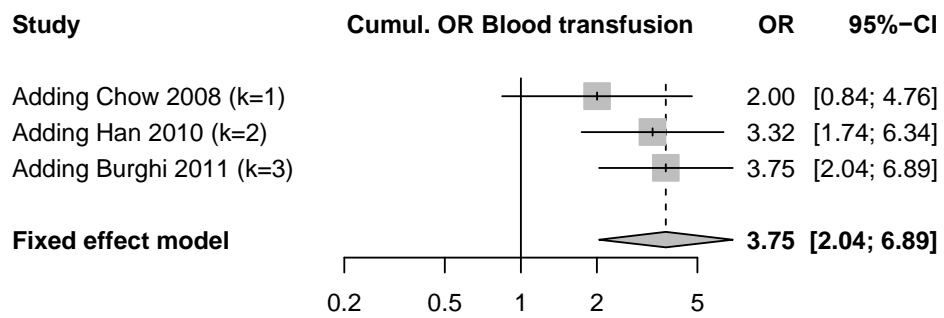

e-Figure 127



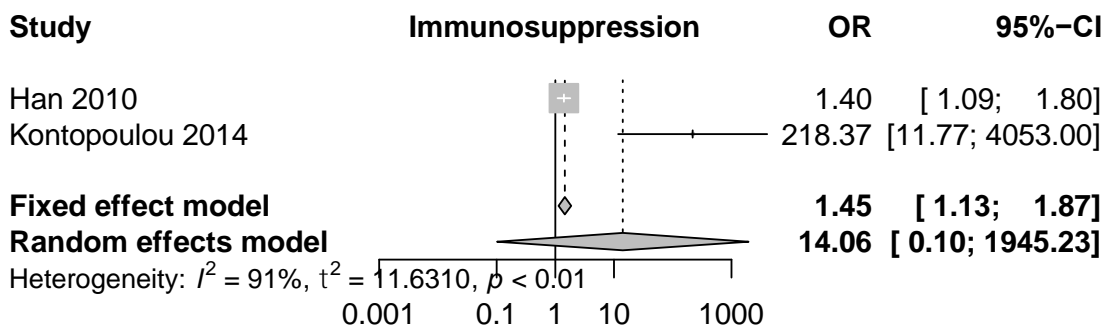

e-Figure 128

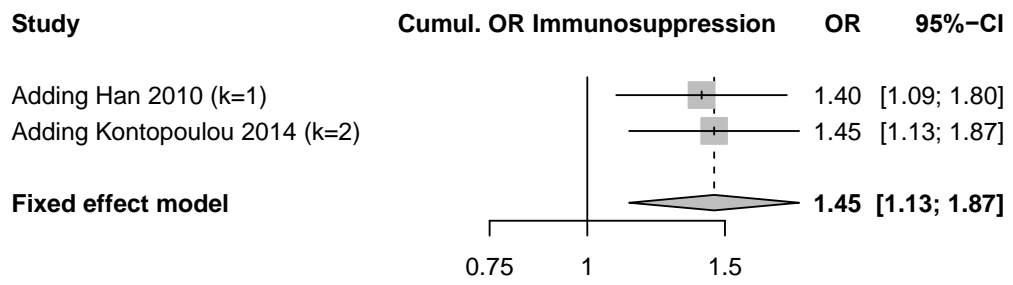

e-Figure 129

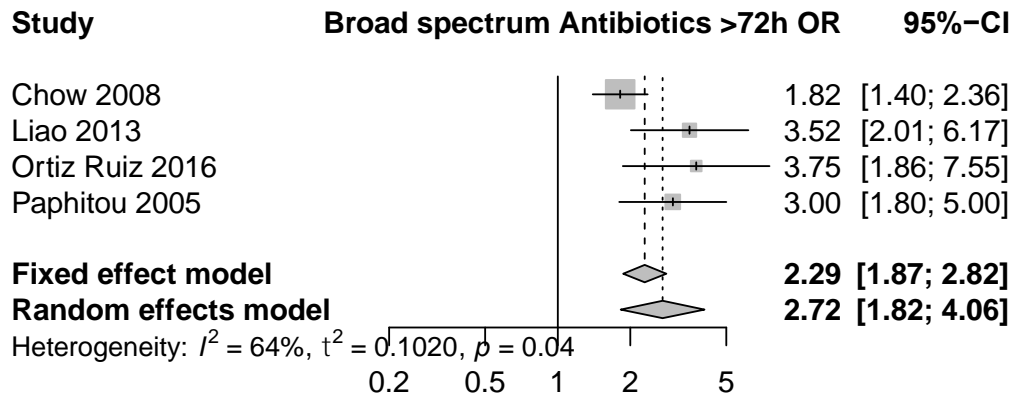

Not selected into the final model in Burghi 2011\*, Michalopoulos 2003 & Pasero 2011

Antibiotic duration / days at risk in Chow 2008

> 4 days in Liao 2013

Meropenem selected into model in Ortiz Ruiz 2016

e-Figure 130

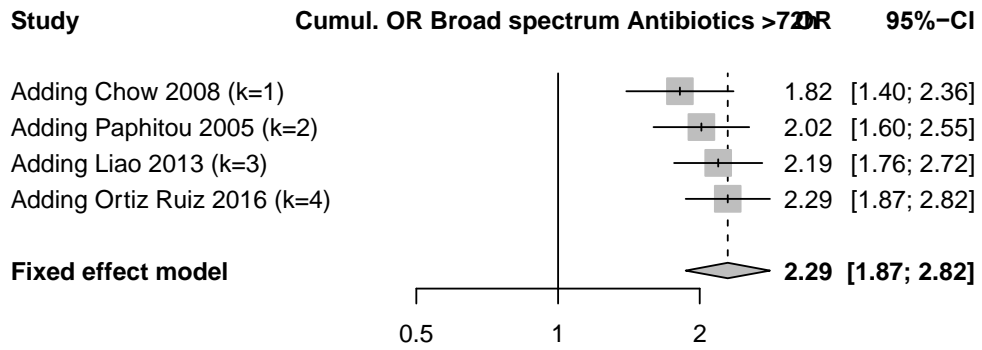

e-Figure 131
